# Supplementary material for: The Successful Diagnosis and Typing of Systemic Amyloidosis Using A Microwave-Assisted Filter-Aided Fast Sample Preparation Method and LC/MS/MS Analysis
Source: PLoS One. 2015 May 18;10(5):e0127180. doi: 10.1371/journal.pone.0127180 (PMC4436214; doi:10.1371/journal.pone.0127180)
Supplement: S2 File — (XLSX) [file pone.0127180.s002.xlsx]

## Sheet: training-1
Cluster	Protein name	Protein accession numbers	Database sources	Protein molecular weight (Da)	Protein identification probability	Exclusive unique peptide count	Exclusive unique spectrum count	Total spectrum count	Percentage of total spectra	Percentage sequence coverage
Cluster of Galectin-7 OS=Homo sapiens GN=LGALS7 PE=1 SV=2 (P47929)	Galectin-7 OS=Homo sapiens GN=LGALS7 PE=1 SV=2	P47929	Uniprot_human_V1.fasta	15074.7	1	2	2	2	0.000253	0.184
Cluster of Lysozyme C OS=Homo sapiens GN=LYZ PE=3 SV=1 (F8VV32)	Lysozyme C OS=Homo sapiens GN=LYZ PE=3 SV=1	F8VV32,P61626	Uniprot_human_V1.fasta	11488.5	0.998	2	2	2	0.000253	0.183
Cluster of Keratin, type I cytoskeletal 9 OS=Homo sapiens GN=KRT9 PE=1 SV=3 (P35527)	Keratin, type I cytoskeletal 9 OS=Homo sapiens GN=KRT9 PE=1 SV=3	P35527	Uniprot_human_V1.fasta	62065.9	1	16	18	21	0.00265	0.356
Cluster of Keratin, type II cytoskeletal 5 OS=Homo sapiens GN=KRT5 PE=1 SV=3 (P13647)	Keratin, type II cytoskeletal 5 OS=Homo sapiens GN=KRT5 PE=1 SV=3	P13647	Uniprot_human_V1.fasta	62379.6	1	9	9	17	0.00215	0.29
Cluster of Keratin, type I cytoskeletal 10 OS=Homo sapiens GN=KRT10 PE=1 SV=6 (P13645)	Keratin, type I cytoskeletal 10 OS=Homo sapiens GN=KRT10 PE=1 SV=6	P13645	Uniprot_human_V1.fasta	58828.8	1	21	23	36	0.00455	0.394
Cluster of Complement C3 OS=Homo sapiens GN=C3 PE=1 SV=2 (P01024)	Complement C3 OS=Homo sapiens GN=C3 PE=1 SV=2	P01024	Uniprot_human_V1.fasta	187149	1	10	10	12	0.00152	0.0788
Cluster of Fibrinogen beta chain OS=Homo sapiens GN=FGB PE=1 SV=2 (P02675)	Fibrinogen beta chain OS=Homo sapiens GN=FGB PE=1 SV=2	P02675	Uniprot_human_V1.fasta	55928.6	1	5	5	6	0.000758	0.149
Cluster of Collagen alpha-1(I) chain OS=Homo sapiens GN=COL1A1 PE=1 SV=5 (P02452)	Collagen alpha-1(I) chain OS=Homo sapiens GN=COL1A1 PE=1 SV=5	P02452	Uniprot_human_V1.fasta	138941	1	9	9	14	0.00177	0.0861
Cluster of Dermatopontin OS=Homo sapiens GN=DPT PE=2 SV=2 (Q07507)	Dermatopontin OS=Homo sapiens GN=DPT PE=2 SV=2	Q07507	Uniprot_human_V1.fasta	24004.7	1	2	2	2	0.000253	0.139
Cluster of Vimentin OS=Homo sapiens GN=VIM PE=3 SV=1 (B0YJC4)	Vimentin OS=Homo sapiens GN=VIM PE=3 SV=1	B0YJC4,P08670	Uniprot_human_V1.fasta	49654.4	1	3	3	3	0.000379	0.0789
Cluster of Fibrinogen gamma chain OS=Homo sapiens GN=FGG PE=4 SV=1 (C9JC84)	Fibrinogen gamma chain OS=Homo sapiens GN=FGG PE=4 SV=1	C9JC84,C9JEU5,P02679,P02679-2	Uniprot_human_V1.fasta	52339.2	1	8	9	10	0.00126	0.234
Cluster of Histone H4 OS=Homo sapiens GN=HIST1H4A PE=1 SV=2 (P62805)	Histone H4 OS=Homo sapiens GN=HIST1H4A PE=1 SV=2	P62805	Uniprot_human_V1.fasta	11367.7	0.997	2	2	2	0.000253	0.214
Cluster of Actin, cytoplasmic 2 OS=Homo sapiens GN=ACTG1 PE=3 SV=1 (I3L3I4)	Actin, cytoplasmic 2 OS=Homo sapiens GN=ACTG1 PE=3 SV=1	I3L3I4,P60709,P63261	Uniprot_human_V1.fasta	42106.8	1	5	5	5	0.000632	0.172
Cluster of Fibrillin-1 OS=Homo sapiens GN=FBN1 PE=1 SV=3 (P35555)	Fibrillin-1 OS=Homo sapiens GN=FBN1 PE=1 SV=3	P35555	Uniprot_human_V1.fasta	312226	1	13	13	13	0.00164	0.047
Cluster of Collagen alpha-2(I) chain OS=Homo sapiens GN=COL1A2 PE=1 SV=7 (P08123)	Collagen alpha-2(I) chain OS=Homo sapiens GN=COL1A2 PE=1 SV=7	P08123	Uniprot_human_V1.fasta	129315	1	6	7	9	0.00114	0.0483
Cluster of Ig lambda-2 chain C regions OS=Homo sapiens GN=IGLC2 PE=1 SV=1 (P0CG05)	Immunoglobulin lambda-like polypeptide 5 OS=Homo sapiens GN=IGLL5 PE=2 SV=2	B9A064	Uniprot_human_V1.fasta	23062.9	0.997	1	1	4	0.000505	0.192
Cluster of Keratin, type I cytoskeletal 16 OS=Homo sapiens GN=KRT16 PE=1 SV=4 (P08779)	Keratin, type I cytoskeletal 17 OS=Homo sapiens GN=KRT17 PE=1 SV=2	Q04695	Uniprot_human_V1.fasta	48106.7	0.998	1	1	8	0.00101	0.153
Cluster of Alpha-2-macroglobulin OS=Homo sapiens GN=A2M PE=1 SV=3 (P01023)	Alpha-2-macroglobulin OS=Homo sapiens GN=A2M PE=1 SV=3	P01023	Uniprot_human_V1.fasta	163290	1	2	2	2	0.000253	0.017
Cluster of Keratin, type I cytoskeletal 16 OS=Homo sapiens GN=KRT16 PE=1 SV=4 (P08779)	Keratin, type I cytoskeletal 16 OS=Homo sapiens GN=KRT16 PE=1 SV=4	P08779	Uniprot_human_V1.fasta	51269	1	6	6	16	0.00202	0.347
Cluster of Keratin, type II cytoskeletal 2 epidermal OS=Homo sapiens GN=KRT2 PE=1 SV=2 (P35908)	Keratin, type II cytoskeletal 1b OS=Homo sapiens GN=KRT77 PE=1 SV=3	Q7Z794	Uniprot_human_V1.fasta	61901.9	0.988	1	1	3	0.000379	0.0502
Cluster of Ig gamma-1 chain C region OS=Homo sapiens GN=IGHG1 PE=1 SV=1 (P01857)	Ig gamma-1 chain C region OS=Homo sapiens GN=IGHG1 PE=1 SV=1	P01857	Uniprot_human_V1.fasta	36105	1	6	6	26	0.00328	0.461
Cluster of Fibronectin OS=Homo sapiens GN=FN1 PE=4 SV=1 (E9PE77)	Fibronectin OS=Homo sapiens GN=FN1 PE=4 SV=1	E9PE77,F8W7G7,P02751,P02751-10,P02751-13,P02751-14,P02751-15,P02751-3,P02751-5,P02751-7,P02751-8,P02751-9	Uniprot_human_V1.fasta	256494	1	4	4	4	0.000505	0.0296
Cluster of Collagen alpha-3(VI) chain OS=Homo sapiens GN=COL6A3 PE=4 SV=1 (E7ENL6)	Collagen alpha-3(VI) chain OS=Homo sapiens GN=COL6A3 PE=4 SV=1	E7ENL6,E9PCV6,E9PFQ6,P12111,P12111-2	Uniprot_human_V1.fasta	322186	1	8	8	8	0.00101	0.0302
Cluster of Keratin, type II cytoskeletal 2 epidermal OS=Homo sapiens GN=KRT2 PE=1 SV=2 (P35908)	Keratin, type II cytoskeletal 2 epidermal OS=Homo sapiens GN=KRT2 PE=1 SV=2	P35908	Uniprot_human_V1.fasta	65433.9	1	26	27	38	0.0048	0.706
Cluster of Ig gamma-1 chain C region OS=Homo sapiens GN=IGHG1 PE=1 SV=1 (P01857)	Ig gamma-3 chain C region OS=Homo sapiens GN=IGHG3 PE=1 SV=2	P01860	Uniprot_human_V1.fasta	41285.9	0.999	1	1	14	0.00177	0.172
Cluster of Hemoglobin subunit beta OS=Homo sapiens GN=HBB PE=1 SV=2 (P68871)	Hemoglobin subunit beta OS=Homo sapiens GN=HBB PE=1 SV=2	P68871	Uniprot_human_V1.fasta	15998	1	2	3	9	0.00114	0.408
Cluster of Serotransferrin OS=Homo sapiens GN=TF PE=1 SV=3 (P02787)	Serotransferrin OS=Homo sapiens GN=TF PE=1 SV=3	P02787	Uniprot_human_V1.fasta	77064.3	1	4	4	4	0.000505	0.0745
Cluster of Hemoglobin subunit alpha OS=Homo sapiens GN=HBA1 PE=1 SV=2 (P69905)	Hemoglobin subunit alpha OS=Homo sapiens GN=HBA1 PE=1 SV=2	P69905	Uniprot_human_V1.fasta	15257.6	1	6	7	8	0.00101	0.43
Cluster of Fibrinogen alpha chain OS=Homo sapiens GN=FGA PE=1 SV=2 (P02671)	Fibrinogen alpha chain OS=Homo sapiens GN=FGA PE=1 SV=2	P02671,P02671-2	Uniprot_human_V1.fasta	94973.4	1	10	10	10	0.00126	0.135
Cluster of Neutrophil defensin 1 OS=Homo sapiens GN=DEFA1 PE=1 SV=1 (P59665)	Neutrophil defensin 1 OS=Homo sapiens GN=DEFA1 PE=1 SV=1	P59665,P59666	Uniprot_human_V1.fasta	10201	0.986	2	2	2	0.000253	0.191
Cluster of Serum albumin OS=Homo sapiens GN=ALB PE=1 SV=2 (P02768)	Serum albumin OS=Homo sapiens GN=ALB PE=1 SV=2	P02768	Uniprot_human_V1.fasta	69366.9	1	13	13	14	0.00177	0.22
Cluster of Protein AMBP OS=Homo sapiens GN=AMBP PE=1 SV=1 (P02760)	Protein AMBP OS=Homo sapiens GN=AMBP PE=1 SV=1	P02760	Uniprot_human_V1.fasta	38999.6	1	2	3	4	0.000505	0.0881
Cluster of Keratin, type II cytoskeletal 1 OS=Homo sapiens GN=KRT1 PE=1 SV=6 (P04264)	Keratin, type II cytoskeletal 1 OS=Homo sapiens GN=KRT1 PE=1 SV=6	P04264	Uniprot_human_V1.fasta	66040.3	1	25	29	39	0.00493	0.514
Cluster of Hemoglobin subunit beta OS=Homo sapiens GN=HBB PE=1 SV=2 (P68871)	Hemoglobin subunit delta OS=Homo sapiens GN=HBD PE=1 SV=2	P02042	Uniprot_human_V1.fasta	16055.2	0.999	1	1	5	0.000632	0.347
Cluster of Ig lambda-2 chain C regions OS=Homo sapiens GN=IGLC2 PE=1 SV=1 (P0CG05)	Ig lambda-2 chain C regions OS=Homo sapiens GN=IGLC2 PE=1 SV=1	P0CG05	Uniprot_human_V1.fasta	11293.2	1	2	3	6	0.000758	0.585
Cluster of Keratin, type II cytoskeletal 6C OS=Homo sapiens GN=KRT6C PE=1 SV=3 (P48668)	Keratin, type II cytoskeletal 6A OS=Homo sapiens GN=KRT6A PE=1 SV=3	P02538	Uniprot_human_V1.fasta	60046.4	1	1	1	16	0.00202	0.284
Cluster of Keratin, type I cytoskeletal 16 OS=Homo sapiens GN=KRT16 PE=1 SV=4 (P08779)	Keratin, type I cytoskeletal 14 OS=Homo sapiens GN=KRT14 PE=1 SV=4	P02533	Uniprot_human_V1.fasta	51562.5	1	5	5	17	0.00215	0.379
Cluster of Collagen alpha-2(VI) chain OS=Homo sapiens GN=COL6A2 PE=1 SV=4 (P12110)	Collagen alpha-2(VI) chain OS=Homo sapiens GN=COL6A2 PE=1 SV=4	P12110,P12110-2,P12110-3	Uniprot_human_V1.fasta	108581	0.995	2	2	2	0.000253	0.0186
Cluster of Keratin, type II cytoskeletal 6C OS=Homo sapiens GN=KRT6C PE=1 SV=3 (P48668)	Keratin, type II cytoskeletal 6C OS=Homo sapiens GN=KRT6C PE=1 SV=3	P48668	Uniprot_human_V1.fasta	60026.7	1	2	2	17	0.00215	0.301

## Sheet: training-2
Cluster	Protein name	Protein accession numbers	Database sources	Protein molecular weight (Da)	Protein identification probability	Exclusive unique peptide count	Exclusive unique spectrum count	Total spectrum count	Percentage of total spectra	Percentage sequence coverage
Cluster of Sushi repeat-containing protein SRPX OS=Homo sapiens GN=SRPX PE=4 SV=1 (F5H4D7)	Sushi repeat-containing protein SRPX OS=Homo sapiens GN=SRPX PE=4 SV=1	F5H4D7,G3V1L0,P78539,P78539-2	Uniprot_human_V1.fasta	41750.7	1	3	3	3	0.000391	0.0818
Cluster of Elongation factor 1-alpha 1 OS=Homo sapiens GN=EEF1A1 PE=1 SV=1 (P68104)	Elongation factor 1-alpha 1 OS=Homo sapiens GN=EEF1A1 PE=1 SV=1	P68104,Q5VTE0	Uniprot_human_V1.fasta	50141.2	1	3	3	3	0.000391	0.0887
Cluster of Cartilage oligomeric matrix protein OS=Homo sapiens GN=COMP PE=4 SV=1 (G3XAP6)	Cartilage oligomeric matrix protein OS=Homo sapiens GN=COMP PE=4 SV=1	G3XAP6,P49747	Uniprot_human_V1.fasta	79694.2	1	8	8	8	0.00104	0.169
Cluster of Myosin-7 OS=Homo sapiens GN=MYH7 PE=1 SV=5 (P12883)	Myosin-9 OS=Homo sapiens GN=MYH9 PE=1 SV=4	P35579,P35579-2	Uniprot_human_V1.fasta	226538	1	6	6	7	0.000913	0.0378
Cluster of Desmoplakin OS=Homo sapiens GN=DSP PE=1 SV=3 (P15924)	Desmoplakin OS=Homo sapiens GN=DSP PE=1 SV=3	P15924,P15924-2	Uniprot_human_V1.fasta	331781	0.934	2	2	2	0.000261	0.00801
Cluster of Myosin-7 OS=Homo sapiens GN=MYH7 PE=1 SV=5 (P12883)	Myosin-7 OS=Homo sapiens GN=MYH7 PE=1 SV=5	P12883	Uniprot_human_V1.fasta	223104	1	10	10	11	0.00143	0.0625
Cluster of Hornerin OS=Homo sapiens GN=HRNR PE=1 SV=2 (Q86YZ3)	Hornerin OS=Homo sapiens GN=HRNR PE=1 SV=2	Q86YZ3	Uniprot_human_V1.fasta	282373	1	3	3	3	0.000391	0.0246
Cluster of Complement C3 OS=Homo sapiens GN=C3 PE=1 SV=2 (P01024)	Complement C3 OS=Homo sapiens GN=C3 PE=1 SV=2	P01024	Uniprot_human_V1.fasta	187149	1	22	23	23	0.003	0.163
Cluster of Alpha-2-macroglobulin OS=Homo sapiens GN=A2M PE=1 SV=3 (P01023)	Alpha-2-macroglobulin OS=Homo sapiens GN=A2M PE=1 SV=3	P01023	Uniprot_human_V1.fasta	163290	1	3	3	4	0.000522	0.0224
Cluster of Peptidyl-prolyl cis-trans isomerase B OS=Homo sapiens GN=PPIB PE=1 SV=2 (P23284)	Peptidyl-prolyl cis-trans isomerase B OS=Homo sapiens GN=PPIB PE=1 SV=2	P23284	Uniprot_human_V1.fasta	23743.2	1	3	3	3	0.000391	0.167
Cluster of Serum albumin OS=Homo sapiens GN=ALB PE=1 SV=2 (P02768)	Serum albumin OS=Homo sapiens GN=ALB PE=1 SV=2	P02768	Uniprot_human_V1.fasta	69366.9	1	39	46	56	0.0073	0.562
Cluster of Transthyretin OS=Homo sapiens GN=TTR PE=1 SV=1 (P02766)	Transthyretin OS=Homo sapiens GN=TTR PE=1 SV=1	P02766	Uniprot_human_V1.fasta	15886.9	1	3	4	5	0.000652	0.184
Cluster of Alpha-enolase OS=Homo sapiens GN=ENO1 PE=1 SV=2 (P06733)	Alpha-enolase OS=Homo sapiens GN=ENO1 PE=1 SV=2	P06733	Uniprot_human_V1.fasta	47170.2	1	5	5	5	0.000652	0.159
Cluster of Serpin H1 OS=Homo sapiens GN=SERPINH1 PE=1 SV=2 (P50454)	Serpin H1 OS=Homo sapiens GN=SERPINH1 PE=1 SV=2	P50454	Uniprot_human_V1.fasta	46442	1	2	2	2	0.000261	0.0646
Cluster of Trypstatin OS=Homo sapiens GN=AMBP PE=2 SV=1 (B7Z8R6)	Trypstatin OS=Homo sapiens GN=AMBP PE=2 SV=1	B7Z8R6,P02760	Uniprot_human_V1.fasta	29778.2	1	4	4	8	0.00104	0.248
Cluster of Hemoglobin subunit beta OS=Homo sapiens GN=HBB PE=1 SV=2 (P68871)	Hemoglobin subunit beta OS=Homo sapiens GN=HBB PE=1 SV=2	P68871	Uniprot_human_V1.fasta	15998	1	3	3	8	0.00104	0.537
Cluster of Alpha-1-antichymotrypsin His-Pro-less OS=Homo sapiens GN=SERPINA3 PE=3 SV=1 (G3V5I3)	Alpha-1-antichymotrypsin His-Pro-less OS=Homo sapiens GN=SERPINA3 PE=3 SV=1	G3V5I3,P01011	Uniprot_human_V1.fasta	50600.5	1	5	5	5	0.000652	0.147
Cluster of Tubulin beta-4A chain OS=Homo sapiens GN=TUBB4A PE=1 SV=2 (P04350)	Tubulin beta-4A chain OS=Homo sapiens GN=TUBB4A PE=1 SV=2	P04350,P68371	Uniprot_human_V1.fasta	49585.5	0.999	1	1	7	0.000913	0.158
Cluster of ITIH4 protein OS=Homo sapiens GN=ITIH4 PE=2 SV=1 (B7ZKJ8)	ITIH4 protein OS=Homo sapiens GN=ITIH4 PE=2 SV=1	B7ZKJ8,E9PGN5,F5GXQ1,H7C0L5,Q14624,Q14624-2	Uniprot_human_V1.fasta	103882	0.974	2	2	2	0.000261	0.0171
Cluster of Ig lambda-2 chain C regions OS=Homo sapiens GN=IGLC2 PE=1 SV=1 (P0CG05)	Immunoglobulin lambda-like polypeptide 5 OS=Homo sapiens GN=IGLL5 PE=2 SV=2	B9A064,P0CG04	Uniprot_human_V1.fasta	23062.9	0.894	1	1	8	0.00104	0.28
Cluster of Dihydropyrimidinase-related protein 3 OS=Homo sapiens GN=DPYSL3 PE=1 SV=1 (Q14195)	Dihydropyrimidinase-related protein 2 OS=Homo sapiens GN=DPYSL2 PE=2 SV=1	B4DR31,Q16555	Uniprot_human_V1.fasta	58162.9	0.908	1	1	2	0.000261	0.0429
Cluster of Complement component C6 OS=Homo sapiens GN=C6 PE=1 SV=3 (P13671)	Complement component C6 OS=Homo sapiens GN=C6 PE=1 SV=3	P13671	Uniprot_human_V1.fasta	104786	0.997	2	2	2	0.000261	0.0203
Cluster of Alpha-1-antitrypsin OS=Homo sapiens GN=SERPINA1 PE=1 SV=3 (P01009)	Alpha-1-antitrypsin OS=Homo sapiens GN=SERPINA1 PE=1 SV=3	P01009	Uniprot_human_V1.fasta	46737.9	1	8	8	8	0.00104	0.242
Cluster of Antithrombin-III OS=Homo sapiens GN=SERPINC1 PE=1 SV=1 (P01008)	Antithrombin-III OS=Homo sapiens GN=SERPINC1 PE=1 SV=1	P01008	Uniprot_human_V1.fasta	52604.1	1	3	3	3	0.000391	0.0582
Cluster of Fibulin-2 OS=Homo sapiens GN=FBLN2 PE=4 SV=1 (F5H1F3)	Fibulin-2 OS=Homo sapiens GN=FBLN2 PE=4 SV=1	F5H1F3,P98095,P98095-2	Uniprot_human_V1.fasta	129452	1	9	9	9	0.00117	0.0669
Cluster of Actinin alpha 1 isoform 3 OS=Homo sapiens GN=ACTN1 PE=2 SV=1 (B7TY16)	Actinin, alpha 2, isoform CRA_b OS=Homo sapiens GN=ACTN2 PE=2 SV=1	B2RCS5,P35609	Uniprot_human_V1.fasta	103924	0.903	1	1	2	0.000261	0.0313
Cluster of EMILIN-1 OS=Homo sapiens GN=EMILIN1 PE=1 SV=2 (Q9Y6C2)	EMILIN-1 OS=Homo sapiens GN=EMILIN1 PE=1 SV=2	Q9Y6C2	Uniprot_human_V1.fasta	106667	1	6	6	6	0.000782	0.0797
Cluster of Periostin OS=Homo sapiens GN=POSTN PE=4 SV=1 (B1ALD8)	Periostin OS=Homo sapiens GN=POSTN PE=4 SV=1	B1ALD8,Q15063-3	Uniprot_human_V1.fasta	90428.4	1	1	1	17	0.00222	0.248
Cluster of Tubulin alpha-1B chain OS=Homo sapiens GN=TUBA1B PE=1 SV=1 (P68363)	Tubulin alpha-1B chain OS=Homo sapiens GN=TUBA1B PE=1 SV=1	P68363	Uniprot_human_V1.fasta	50151.7	1	9	9	9	0.00117	0.288
Cluster of Fibrillin-1 OS=Homo sapiens GN=FBN1 PE=1 SV=3 (P35555)	Fibrillin-1 OS=Homo sapiens GN=FBN1 PE=1 SV=3	P35555	Uniprot_human_V1.fasta	312226	1	72	75	96	0.0125	0.324
Cluster of Annexin OS=Homo sapiens GN=ANXA6 PE=3 SV=3 (A6NN80)	Annexin OS=Homo sapiens GN=ANXA6 PE=3 SV=3	A6NN80,E9PGK1,P08133	Uniprot_human_V1.fasta	75280.8	1	3	3	3	0.000391	0.039
Cluster of Actin-related protein 2/3 complex subunit 4 OS=Homo sapiens GN=ARPC4 PE=4 SV=1 (C9JWM7)	Actin-related protein 2/3 complex subunit 4 OS=Homo sapiens GN=ARPC4 PE=4 SV=1	C9JWM7,E7ETI0,F8WCF6,F8WDD7,P59998	Uniprot_human_V1.fasta	21588.4	1	3	3	3	0.000391	0.16
Cluster of Glyceraldehyde-3-phosphate dehydrogenase OS=Homo sapiens GN=GAPDH PE=1 SV=3 (P04406)	Glyceraldehyde-3-phosphate dehydrogenase OS=Homo sapiens GN=GAPDH PE=1 SV=3	P04406	Uniprot_human_V1.fasta	36053.4	1	6	6	7	0.000913	0.176
Cluster of Galectin-1 OS=Homo sapiens GN=LGALS1 PE=1 SV=2 (P09382)	Galectin-1 OS=Homo sapiens GN=LGALS1 PE=1 SV=2	P09382	Uniprot_human_V1.fasta	14715.8	1	2	2	2	0.000261	0.2
Cluster of Collagen alpha-2(IV) chain OS=Homo sapiens GN=COL4A2 PE=1 SV=4 (P08572)	Collagen alpha-2(IV) chain OS=Homo sapiens GN=COL4A2 PE=1 SV=4	P08572	Uniprot_human_V1.fasta	167558	0.996	2	2	2	0.000261	0.0158
Cluster of Histone H4 OS=Homo sapiens GN=HIST1H4A PE=1 SV=2 (P62805)	Histone H4 OS=Homo sapiens GN=HIST1H4A PE=1 SV=2	P62805	Uniprot_human_V1.fasta	11367.7	1	3	3	3	0.000391	0.33
Cluster of Collagen alpha-2(I) chain OS=Homo sapiens GN=COL1A2 PE=1 SV=7 (P08123)	Collagen alpha-2(I) chain OS=Homo sapiens GN=COL1A2 PE=1 SV=7	P08123	Uniprot_human_V1.fasta	129315	1	7	8	11	0.00143	0.0505
Cluster of Peptidyl-prolyl cis-trans isomerase A OS=Homo sapiens GN=PPIA PE=1 SV=2 (P62937)	Peptidyl-prolyl cis-trans isomerase A OS=Homo sapiens GN=PPIA PE=1 SV=2	P62937	Uniprot_human_V1.fasta	18012.9	1	3	3	3	0.000391	0.206
Cluster of Elastin OS=Homo sapiens GN=ELN PE=4 SV=1 (E7EN65)	Elastin OS=Homo sapiens GN=ELN PE=4 SV=1	E7EN65,E7ENM0,E9PBM4,P15502-1,P15502-2,P15502-4,P15502-5	Uniprot_human_V1.fasta	61921.5	1	3	3	6	0.000782	0.139
Cluster of Heat shock protein beta-1 OS=Homo sapiens GN=HSPB1 PE=1 SV=2 (P04792)	Heat shock protein beta-1 OS=Homo sapiens GN=HSPB1 PE=1 SV=2	P04792	Uniprot_human_V1.fasta	22782.6	1	3	3	3	0.000391	0.18
Cluster of Ig alpha-1 chain C region OS=Homo sapiens GN=IGHA1 PE=1 SV=2 (P01876)	Ig alpha-1 chain C region OS=Homo sapiens GN=IGHA1 PE=1 SV=2	P01876	Uniprot_human_V1.fasta	37653.8	1	4	4	4	0.000522	0.144
Cluster of Heat shock 70 kDa protein 1A/1B OS=Homo sapiens GN=HSPA1A PE=1 SV=5 (P08107)	Heat shock 70 kDa protein 1A/1B OS=Homo sapiens GN=HSPA1A PE=1 SV=5	P08107	Uniprot_human_V1.fasta	70054	1	4	4	5	0.000652	0.109
Cluster of Fibrinogen gamma chain OS=Homo sapiens GN=FGG PE=4 SV=1 (C9JC84)	Fibrinogen gamma chain OS=Homo sapiens GN=FGG PE=4 SV=1	C9JC84,C9JEU5,P02679,P02679-2	Uniprot_human_V1.fasta	52339.2	1	10	11	13	0.00169	0.278
Cluster of Keratin, type II cytoskeletal 2 epidermal OS=Homo sapiens GN=KRT2 PE=1 SV=2 (P35908)	Keratin, type II cytoskeletal 5 OS=Homo sapiens GN=KRT5 PE=1 SV=3	P13647	Uniprot_human_V1.fasta	62379.6	1	9	9	18	0.00235	0.229
Cluster of Keratin, type I cytoskeletal 10 OS=Homo sapiens GN=KRT10 PE=1 SV=6 (P13645)	Keratin, type I cytoskeletal 10 OS=Homo sapiens GN=KRT10 PE=1 SV=6	P13645	Uniprot_human_V1.fasta	58828.8	1	21	23	32	0.00417	0.361
Cluster of Fibrinogen beta chain OS=Homo sapiens GN=FGB PE=1 SV=2 (P02675)	Fibrinogen beta chain OS=Homo sapiens GN=FGB PE=1 SV=2	P02675	Uniprot_human_V1.fasta	55928.6	1	5	5	5	0.000652	0.151
Cluster of Complement factor H OS=Homo sapiens GN=CFH PE=1 SV=4 (P08603)	Complement factor H OS=Homo sapiens GN=CFH PE=1 SV=4	P08603	Uniprot_human_V1.fasta	139096	1	7	7	7	0.000913	0.0682
Cluster of Serum amyloid P-component OS=Homo sapiens GN=APCS PE=1 SV=2 (P02743)	Serum amyloid P-component OS=Homo sapiens GN=APCS PE=1 SV=2	P02743	Uniprot_human_V1.fasta	25387.7	1	9	9	12	0.00156	0.318
Cluster of Actin, aortic smooth muscle OS=Homo sapiens GN=ACTA2 PE=1 SV=1 (P62736)	Actin, cytoplasmic 1 OS=Homo sapiens GN=ACTB PE=1 SV=1	P60709,P63261	Uniprot_human_V1.fasta	41737.8	1	5	5	16	0.00209	0.307
Cluster of Keratin, type I cytoskeletal 14 OS=Homo sapiens GN=KRT14 PE=1 SV=4 (P02533)	Keratin, type I cytoskeletal 17 OS=Homo sapiens GN=KRT17 PE=1 SV=2	Q04695	Uniprot_human_V1.fasta	48106.7	1	1	1	13	0.00169	0.282
Cluster of Ig gamma-1 chain C region OS=Homo sapiens GN=IGHG1 PE=1 SV=1 (P01857)	Ig gamma-3 chain C region OS=Homo sapiens GN=IGHG3 PE=1 SV=2	P01860	Uniprot_human_V1.fasta	41285.9	0.999	2	2	18	0.00235	0.273
Cluster of Myosin regulatory light chain 12A OS=Homo sapiens GN=MYL12A PE=4 SV=1 (J3QRS3)	Myosin regulatory light chain 12A OS=Homo sapiens GN=MYL12A PE=4 SV=1	J3QRS3,O14950,P19105	Uniprot_human_V1.fasta	20458.1	1	2	2	2	0.000261	0.107
Cluster of Keratin, type I cytoskeletal 9 OS=Homo sapiens GN=KRT9 PE=1 SV=3 (P35527)	Keratin, type I cytoskeletal 9 OS=Homo sapiens GN=KRT9 PE=1 SV=3	P35527	Uniprot_human_V1.fasta	62065.9	1	21	23	28	0.00365	0.583
Cluster of Elongation factor 2 OS=Homo sapiens GN=EEF2 PE=1 SV=4 (P13639)	Elongation factor 2 OS=Homo sapiens GN=EEF2 PE=1 SV=4	P13639	Uniprot_human_V1.fasta	95340.1	0.998	2	2	2	0.000261	0.0175
Cluster of Inter-alpha-trypsin inhibitor heavy chain H1 OS=Homo sapiens GN=ITIH1 PE=4 SV=1 (F5H7E1)	Inter-alpha-trypsin inhibitor heavy chain H1 OS=Homo sapiens GN=ITIH1 PE=4 SV=1	F5H7E1,P19827	Uniprot_human_V1.fasta	72121.8	1	4	4	4	0.000522	0.076
Cluster of Phosphoglycerate kinase 1 OS=Homo sapiens GN=PGK1 PE=2 SV=1 (B7Z7A9)	Phosphoglycerate kinase 1 OS=Homo sapiens GN=PGK1 PE=2 SV=1	B7Z7A9,P00558	Uniprot_human_V1.fasta	41429.5	1	4	4	4	0.000522	0.18
Cluster of Ig gamma-1 chain C region OS=Homo sapiens GN=IGHG1 PE=1 SV=1 (P01857)	Ig gamma-2 chain C region OS=Homo sapiens GN=IGHG2 PE=1 SV=2	P01859	Uniprot_human_V1.fasta	35899.2	1	4	4	18	0.00235	0.319
Cluster of Histone H2B OS=Homo sapiens GN=HIST2H2BF PE=2 SV=1 (B4DR52)	Histone H2B OS=Homo sapiens GN=HIST2H2BF PE=2 SV=1	B4DR52,O60814,P57053,P58876,P62807,Q5QNW6,Q5QNW6-2,Q93079,Q99877,Q99879,Q99880	Uniprot_human_V1.fasta	18041.3	1	2	2	3	0.000391	0.108
Cluster of Ig gamma-1 chain C region OS=Homo sapiens GN=IGHG1 PE=1 SV=1 (P01857)	Ig gamma-1 chain C region OS=Homo sapiens GN=IGHG1 PE=1 SV=1	P01857	Uniprot_human_V1.fasta	36105	1	7	10	34	0.00443	0.5
Cluster of Serine protease HTRA1 OS=Homo sapiens GN=HTRA1 PE=1 SV=1 (Q92743)	Serine protease HTRA1 OS=Homo sapiens GN=HTRA1 PE=1 SV=1	Q92743	Uniprot_human_V1.fasta	51287.3	1	4	4	4	0.000522	0.0812
Cluster of Profilin-1 OS=Homo sapiens GN=PFN1 PE=1 SV=2 (P07737)	Profilin-1 OS=Homo sapiens GN=PFN1 PE=1 SV=2	P07737	Uniprot_human_V1.fasta	15054.3	1	5	5	5	0.000652	0.471
Cluster of L-lactate dehydrogenase OS=Homo sapiens GN=LDHA PE=3 SV=1 (F5H308)	L-lactate dehydrogenase B chain OS=Homo sapiens GN=LDHB PE=1 SV=2	P07195	Uniprot_human_V1.fasta	36638.6	0.948	1	1	2	0.000261	0.0629
Cluster of Mimecan OS=Homo sapiens GN=OGN PE=1 SV=1 (P20774)	Mimecan OS=Homo sapiens GN=OGN PE=1 SV=1	P20774	Uniprot_human_V1.fasta	33925	1	6	6	7	0.000913	0.164
Cluster of 78 kDa glucose-regulated protein OS=Homo sapiens GN=HSPA5 PE=1 SV=2 (P11021)	78 kDa glucose-regulated protein OS=Homo sapiens GN=HSPA5 PE=1 SV=2	P11021	Uniprot_human_V1.fasta	72334.7	1	2	2	2	0.000261	0.0474
Cluster of Basement membrane-specific heparan sulfate proteoglycan core protein OS=Homo sapiens GN=HSPG2 PE=1 SV=4 (P98160)	Basement membrane-specific heparan sulfate proteoglycan core protein OS=Homo sapiens GN=HSPG2 PE=1 SV=4	P98160	Uniprot_human_V1.fasta	468811	1	23	23	24	0.00313	0.0781
Cluster of Annexin (Fragment) OS=Homo sapiens GN=ANXA2 PE=3 SV=1 (H0YMD0)	Annexin (Fragment) OS=Homo sapiens GN=ANXA2 PE=3 SV=1	H0YMD0,H0YMU9,H0YN42,P07355,P07355-2	Uniprot_human_V1.fasta	25342.9	1	6	6	6	0.000782	0.269
Cluster of Coiled-coil domain-containing protein 80 OS=Homo sapiens GN=CCDC80 PE=1 SV=1 (Q76M96)	Coiled-coil domain-containing protein 80 OS=Homo sapiens GN=CCDC80 PE=1 SV=1	Q76M96,Q76M96-2	Uniprot_human_V1.fasta	108176	1	6	6	6	0.000782	0.0695
Cluster of Lysozyme C OS=Homo sapiens GN=LYZ PE=1 SV=1 (P61626)	Lysozyme C OS=Homo sapiens GN=LYZ PE=1 SV=1	P61626	Uniprot_human_V1.fasta	16536.9	1	5	5	5	0.000652	0.412
Cluster of Tenascin-X OS=Homo sapiens GN=TNXB PE=4 SV=1 (E7EPQ1)	Tenascin-X OS=Homo sapiens GN=TNXB PE=4 SV=1	E7EPQ1,E7EPZ9,E7EU03,E7EWZ8,P22105,P22105-3	Uniprot_human_V1.fasta	458244	1	15	15	15	0.00196	0.0422
Cluster of Keratin, type II cytoskeletal 1 OS=Homo sapiens GN=KRT1 PE=1 SV=6 (P04264)	Keratin, type II cytoskeletal 1 OS=Homo sapiens GN=KRT1 PE=1 SV=6	P04264	Uniprot_human_V1.fasta	66040.3	1	24	27	42	0.00548	0.514
Cluster of Ubiquitin OS=Homo sapiens GN=UBB PE=2 SV=1 (B4DV12)	Ubiquitin OS=Homo sapiens GN=UBB PE=2 SV=1	B4DV12,F5GXK7,F5GYU3,F5H041,F5H265,F5H2Z3,F5H388,F5H4D8,F5H6Q2,F5H747,F5H7K6,F5H7Y5,J3QKN0,J3QS39,J3QTR3,P0CG47,P0CG48,P62979,P62987,Q96C32	Uniprot_human_V1.fasta	17215.6	1	4	4	4	0.000522	0.288
Cluster of Apolipoprotein E OS=Homo sapiens GN=APOE PE=1 SV=1 (P02649)	Apolipoprotein E OS=Homo sapiens GN=APOE PE=1 SV=1	P02649	Uniprot_human_V1.fasta	36153.5	1	13	14	14	0.00183	0.404
Cluster of Apolipoprotein A-I OS=Homo sapiens GN=APOA1 PE=1 SV=1 (P02647)	Apolipoprotein A-I OS=Homo sapiens GN=APOA1 PE=1 SV=1	P02647	Uniprot_human_V1.fasta	30778.5	1	7	7	7	0.000913	0.247
Cluster of Ig kappa chain C region OS=Homo sapiens GN=IGKC PE=1 SV=1 (P01834)	Ig kappa chain C region OS=Homo sapiens GN=IGKC PE=1 SV=1	P01834	Uniprot_human_V1.fasta	11608.6	1	3	3	6	0.000782	0.491
Cluster of Keratin, type II cytoskeletal 2 epidermal OS=Homo sapiens GN=KRT2 PE=1 SV=2 (P35908)	Keratin, type II cytoskeletal 6B OS=Homo sapiens GN=KRT6B PE=1 SV=5	P04259	Uniprot_human_V1.fasta	60068.6	1	2	2	19	0.00248	0.271
Cluster of Transforming growth factor-beta-induced protein ig-h3 OS=Homo sapiens GN=TGFBI PE=4 SV=1 (G8JLA8)	Transforming growth factor-beta-induced protein ig-h3 OS=Homo sapiens GN=TGFBI PE=4 SV=1	G8JLA8,Q15582	Uniprot_human_V1.fasta	74695.8	1	7	7	7	0.000913	0.126
Cluster of Ras-related C3 botulinum toxin substrate 2 OS=Homo sapiens GN=RAC2 PE=3 SV=1 (B1AH77)	Ras-related C3 botulinum toxin substrate 2 OS=Homo sapiens GN=RAC2 PE=3 SV=1	B1AH77,B1AH80,J3KSC4,J3QLK0,P15153,P60763,P63000,P63000-2	Uniprot_human_V1.fasta	16776	1	2	2	2	0.000261	0.122
Cluster of Latent-transforming growth factor beta-binding protein 2 OS=Homo sapiens GN=LTBP2 PE=4 SV=1 (G3V3X5)	Latent-transforming growth factor beta-binding protein 2 OS=Homo sapiens GN=LTBP2 PE=4 SV=1	G3V3X5,G3V511,Q14767	Uniprot_human_V1.fasta	190278	1	5	5	5	0.000652	0.0349
Cluster of Procollagen C-endopeptidase enhancer 2 OS=Homo sapiens GN=PCOLCE2 PE=1 SV=1 (Q9UKZ9)	Procollagen C-endopeptidase enhancer 2 OS=Homo sapiens GN=PCOLCE2 PE=1 SV=1	Q9UKZ9	Uniprot_human_V1.fasta	45717.3	1	4	4	5	0.000652	0.0964
Cluster of Prolargin OS=Homo sapiens GN=PRELP PE=1 SV=1 (P51888)	Prolargin OS=Homo sapiens GN=PRELP PE=1 SV=1	P51888	Uniprot_human_V1.fasta	43812.4	1	9	9	12	0.00156	0.259
Cluster of Keratin, type I cytoskeletal 14 OS=Homo sapiens GN=KRT14 PE=1 SV=4 (P02533)	Junction plakoglobin OS=Homo sapiens GN=JUP PE=3 SV=1	F5GWP8	Uniprot_human_V1.fasta	66351.2	0.629	1	1	11	0.00143	0.195
Cluster of Latent-transforming growth factor beta-binding protein 1 OS=Homo sapiens GN=LTBP1 PE=4 SV=1 (C9JD84)	Latent-transforming growth factor beta-binding protein 1 OS=Homo sapiens GN=LTBP1 PE=4 SV=1	C9JD84,E7EV71,Q14766,Q14766-2,Q14766-3,Q14766-4,Q14766-5	Uniprot_human_V1.fasta	186787	0.999	2	2	2	0.000261	0.0187
Cluster of Lumican OS=Homo sapiens GN=LUM PE=1 SV=2 (P51884)	Lumican OS=Homo sapiens GN=LUM PE=1 SV=2	P51884	Uniprot_human_V1.fasta	38431.5	1	6	7	7	0.000913	0.18
Cluster of Protein-glutamine gamma-glutamyltransferase 2 OS=Homo sapiens GN=TGM2 PE=2 SV=1 (B4DIT7)	Protein-glutamine gamma-glutamyltransferase 2 OS=Homo sapiens GN=TGM2 PE=2 SV=1	B4DIT7,F5H6P0,P21980	Uniprot_human_V1.fasta	68649.2	1	5	5	5	0.000652	0.0924
Cluster of Collagen alpha-3(VI) chain OS=Homo sapiens GN=COL6A3 PE=4 SV=1 (E7ENL6)	Collagen alpha-3(VI) chain OS=Homo sapiens GN=COL6A3 PE=4 SV=1	E7ENL6,E9PCV6,E9PFQ6,P12111,P12111-2	Uniprot_human_V1.fasta	322186	1	53	60	68	0.00887	0.197
Cluster of Glutathione peroxidase 3 OS=Homo sapiens GN=GPX3 PE=1 SV=2 (P22352)	Glutathione peroxidase 3 OS=Homo sapiens GN=GPX3 PE=1 SV=2	P22352	Uniprot_human_V1.fasta	25553.2	1	2	2	2	0.000261	0.119
Cluster of EGF-containing fibulin-like extracellular matrix protein 1 OS=Homo sapiens GN=EFEMP1 PE=1 SV=2 (Q12805)	EGF-containing fibulin-like extracellular matrix protein 1 OS=Homo sapiens GN=EFEMP1 PE=1 SV=2	Q12805,Q12805-2,Q12805-3,Q12805-4	Uniprot_human_V1.fasta	54639.1	1	2	2	2	0.000261	0.0487
Cluster of Glia-derived nexin OS=Homo sapiens GN=SERPINE2 PE=1 SV=1 (P07093)	Glia-derived nexin OS=Homo sapiens GN=SERPINE2 PE=1 SV=1	P07093,P07093-2,P07093-3	Uniprot_human_V1.fasta	44003.2	1	5	6	6	0.000782	0.106
Cluster of L-lactate dehydrogenase OS=Homo sapiens GN=LDHA PE=3 SV=1 (F5H308)	L-lactate dehydrogenase OS=Homo sapiens GN=LDHA PE=3 SV=1	F5H308,P00338,P00338-3	Uniprot_human_V1.fasta	33656.7	1	4	4	5	0.000652	0.151
Cluster of Aspartate aminotransferase OS=Homo sapiens GN=GOT2 PE=3 SV=1 (E7ERW2)	Aspartate aminotransferase OS=Homo sapiens GN=GOT2 PE=3 SV=1	E7ERW2,P00505	Uniprot_human_V1.fasta	43030.2	1	2	2	2	0.000261	0.0568
Cluster of Procollagen C-endopeptidase enhancer 1 OS=Homo sapiens GN=PCOLCE PE=1 SV=2 (Q15113)	Procollagen C-endopeptidase enhancer 1 OS=Homo sapiens GN=PCOLCE PE=1 SV=2	Q15113	Uniprot_human_V1.fasta	47972.5	1	3	3	3	0.000391	0.116
Cluster of Neuroblast differentiation-associated protein AHNAK OS=Homo sapiens GN=AHNAK PE=1 SV=2 (Q09666)	Neuroblast differentiation-associated protein AHNAK OS=Homo sapiens GN=AHNAK PE=1 SV=2	Q09666	Uniprot_human_V1.fasta	629104	1	6	6	6	0.000782	0.0153
Cluster of Clusterin OS=Homo sapiens GN=CLU PE=1 SV=1 (P10909)	Clusterin OS=Homo sapiens GN=CLU PE=1 SV=1	P10909,P10909-2,P10909-4,P10909-5	Uniprot_human_V1.fasta	52495	1	11	13	15	0.00196	0.245
Cluster of Periostin OS=Homo sapiens GN=POSTN PE=4 SV=1 (B1ALD8)	Periostin OS=Homo sapiens GN=POSTN PE=4 SV=1	B1ALD9,Q15063	Uniprot_human_V1.fasta	90147.4	0.999	1	1	17	0.00222	0.246
Cluster of Ceruloplasmin OS=Homo sapiens GN=CP PE=4 SV=1 (E9PFZ2)	Ceruloplasmin OS=Homo sapiens GN=CP PE=4 SV=1	E9PFZ2,P00450	Uniprot_human_V1.fasta	108823	1	4	4	4	0.000522	0.0592
Cluster of Vitamin D-binding protein OS=Homo sapiens GN=GC PE=4 SV=1 (D6RAK8)	Vitamin D-binding protein OS=Homo sapiens GN=GC PE=4 SV=1	D6RAK8,D6RF35,P02774,P02774-2	Uniprot_human_V1.fasta	55077.9	1	3	3	3	0.000391	0.0446
Cluster of Myosin-7 OS=Homo sapiens GN=MYH7 PE=1 SV=5 (P12883)	Myosin-11 OS=Homo sapiens GN=MYH11 PE=1 SV=3	P35749,Q3MIV8	Uniprot_human_V1.fasta	227345	0.063	0	0	3	0.000391	0.0132
Cluster of Decorin OS=Homo sapiens GN=DCN PE=1 SV=1 (P07585)	Decorin OS=Homo sapiens GN=DCN PE=1 SV=1	P07585	Uniprot_human_V1.fasta	39748.2	1	7	7	12	0.00156	0.206
Cluster of Keratin, type II cytoskeletal 2 epidermal OS=Homo sapiens GN=KRT2 PE=1 SV=2 (P35908)	Keratin, type II cytoskeletal 2 epidermal OS=Homo sapiens GN=KRT2 PE=1 SV=2	P35908	Uniprot_human_V1.fasta	65433.9	1	20	21	34	0.00443	0.563
Cluster of Ig mu chain C region OS=Homo sapiens GN=IGHM PE=1 SV=3 (P01871)	Ig mu chain C region OS=Homo sapiens GN=IGHM PE=1 SV=3	P01871,P01871-2	Uniprot_human_V1.fasta	49305.7	1	3	3	3	0.000391	0.0752
Cluster of Versican core protein OS=Homo sapiens GN=VCAN PE=1 SV=3 (P13611)	Versican core protein OS=Homo sapiens GN=VCAN PE=1 SV=3	P13611,P13611-2,P13611-5	Uniprot_human_V1.fasta	372813	1	7	7	8	0.00104	0.0244
Cluster of Prelamin-A/C OS=Homo sapiens GN=LMNA PE=1 SV=1 (P02545)	Prelamin-A/C OS=Homo sapiens GN=LMNA PE=1 SV=1	P02545	Uniprot_human_V1.fasta	74140.7	1	11	11	11	0.00143	0.188
Cluster of Ig lambda-2 chain C regions OS=Homo sapiens GN=IGLC2 PE=1 SV=1 (P0CG05)	Ig lambda-2 chain C regions OS=Homo sapiens GN=IGLC2 PE=1 SV=1	P0CG05	Uniprot_human_V1.fasta	11293.2	1	2	3	22	0.00287	0.66
Cluster of Hemoglobin subunit beta OS=Homo sapiens GN=HBB PE=1 SV=2 (P68871)	Hemoglobin subunit delta OS=Homo sapiens GN=HBD PE=1 SV=2	P02042	Uniprot_human_V1.fasta	16055.2	0.999	2	2	5	0.000652	0.429
Cluster of Actinin alpha 1 isoform 3 OS=Homo sapiens GN=ACTN1 PE=2 SV=1 (B7TY16)	Actinin alpha 1 isoform 3 OS=Homo sapiens GN=ACTN1 PE=2 SV=1	B7TY16,H9KV75,P12814,P12814-2,P12814-3	Uniprot_human_V1.fasta	107145	1	2	2	3	0.000391	0.0344
Cluster of Keratin, type II cytoskeletal 2 epidermal OS=Homo sapiens GN=KRT2 PE=1 SV=2 (P35908)	Keratin, type II cytoskeletal 6A OS=Homo sapiens GN=KRT6A PE=1 SV=3	P02538	Uniprot_human_V1.fasta	60046.4	1	4	4	22	0.00287	0.319
Cluster of Keratin, type I cytoskeletal 14 OS=Homo sapiens GN=KRT14 PE=1 SV=4 (P02533)	Keratin, type I cytoskeletal 14 OS=Homo sapiens GN=KRT14 PE=1 SV=4	P02533	Uniprot_human_V1.fasta	51562.5	1	6	6	14	0.00183	0.331
Cluster of Alpha-1B-glycoprotein OS=Homo sapiens GN=A1BG PE=1 SV=4 (P04217)	Alpha-1B-glycoprotein OS=Homo sapiens GN=A1BG PE=1 SV=4	P04217,P04217-2	Uniprot_human_V1.fasta	54253.3	0.997	2	2	2	0.000261	0.0364
Cluster of Fibulin-1 OS=Homo sapiens GN=FBLN1 PE=1 SV=4 (P23142)	Fibulin-1 OS=Homo sapiens GN=FBLN1 PE=1 SV=4	P23142,P23142-3	Uniprot_human_V1.fasta	77211.6	1	4	4	4	0.000522	0.064
Cluster of Moesin OS=Homo sapiens GN=MSN PE=1 SV=3 (P26038)	Moesin OS=Homo sapiens GN=MSN PE=1 SV=3	P26038	Uniprot_human_V1.fasta	67821.8	1	5	5	5	0.000652	0.0728
Cluster of Complement component C4B (Childo blood group) OS=Homo sapiens GN=C4B-1 PE=4 SV=1 (A2BHY4)	Complement component C4B (Childo blood group) OS=Homo sapiens GN=C4B-1 PE=4 SV=1	A2BHY4,A6H8M8,B0UZ83,B0V2C8,F5GXS0,F8VNV9,F8VSI2,F8VW91,F8VX64,F8VZD8,P0C0L4,P0C0L5,Q5JNX2,Q6U2E9	Uniprot_human_V1.fasta	192799	1	6	6	6	0.000782	0.0373
Cluster of Vimentin OS=Homo sapiens GN=VIM PE=1 SV=4 (P08670)	Desmin OS=Homo sapiens GN=DES PE=1 SV=3	P17661	Uniprot_human_V1.fasta	53536.6	1	15	18	26	0.00339	0.368
Cluster of Glutathione S-transferase P OS=Homo sapiens GN=GSTP1 PE=3 SV=1 (A8MX94)	Glutathione S-transferase P OS=Homo sapiens GN=GSTP1 PE=3 SV=1	A8MX94,P09211	Uniprot_human_V1.fasta	19481.2	1	2	2	2	0.000261	0.155
Cluster of Periostin OS=Homo sapiens GN=POSTN PE=4 SV=1 (B1ALD8)	Isoform 2 of Periostin OS=Homo sapiens GN=POSTN	Q15063-2,Q15063-4	Uniprot_human_V1.fasta	87024.4	0.997	1	1	16	0.00209	0.246
Cluster of Collagen alpha-1(XV) chain OS=Homo sapiens GN=COL15A1 PE=1 SV=2 (P39059)	Collagen alpha-1(XV) chain OS=Homo sapiens GN=COL15A1 PE=1 SV=2	P39059	Uniprot_human_V1.fasta	141722	1	5	5	5	0.000652	0.0447
Cluster of Histone H1.4 OS=Homo sapiens GN=HIST1H1E PE=1 SV=2 (P10412)	Histone H1.4 OS=Homo sapiens GN=HIST1H1E PE=1 SV=2	P10412,P16402,P16403	Uniprot_human_V1.fasta	22351.3	1	4	4	4	0.000522	0.155
Cluster of ATP synthase subunit alpha OS=Homo sapiens GN=ATP5A1 PE=2 SV=1 (A8K092)	ATP synthase subunit alpha OS=Homo sapiens GN=ATP5A1 PE=2 SV=1	A8K092,P25705	Uniprot_human_V1.fasta	54495.1	1	4	4	4	0.000522	0.0915
Cluster of Annexin A1 OS=Homo sapiens GN=ANXA1 PE=1 SV=2 (P04083)	Annexin A1 OS=Homo sapiens GN=ANXA1 PE=1 SV=2	P04083	Uniprot_human_V1.fasta	38715.9	1	4	4	4	0.000522	0.179
Cluster of Alpha-crystallin B chain (Fragment) OS=Homo sapiens GN=CRYAB PE=3 SV=1 (E9PJL7)	Alpha-crystallin B chain (Fragment) OS=Homo sapiens GN=CRYAB PE=3 SV=1	E9PJL7,E9PR44,E9PRA8,P02511	Uniprot_human_V1.fasta	15446	0.999	3	3	3	0.000391	0.246
Cluster of Myosin light polypeptide 6 OS=Homo sapiens GN=MYL6 PE=2 SV=1 (B7Z6Z4)	Myosin light polypeptide 6 OS=Homo sapiens GN=MYL6 PE=2 SV=1	B7Z6Z4,F8VPF3,F8VZV5,F8W1I5,F8W1R7,G3V1V0,G8JLA2,J3KND3,P14649,P60660,P60660-2	Uniprot_human_V1.fasta	26706.4	1	2	2	2	0.000261	0.101
Cluster of Lactadherin OS=Homo sapiens GN=MFGE8 PE=4 SV=1 (F5GZN3)	Lactadherin OS=Homo sapiens GN=MFGE8 PE=4 SV=1	F5GZN3,F5H7N9,Q08431,Q08431-2	Uniprot_human_V1.fasta	38343.8	1	4	4	5	0.000652	0.149
Cluster of Apolipoprotein A-IV OS=Homo sapiens GN=APOA4 PE=1 SV=3 (P06727)	Apolipoprotein A-IV OS=Homo sapiens GN=APOA4 PE=1 SV=3	P06727	Uniprot_human_V1.fasta	45399.4	1	32	34	45	0.00587	0.649
Cluster of Serine protease 23 OS=Homo sapiens GN=PRSS23 PE=2 SV=1 (B4E2J3)	Serine protease 23 OS=Homo sapiens GN=PRSS23 PE=2 SV=1	B4E2J3,O95084	Uniprot_human_V1.fasta	39642.7	0.986	2	2	2	0.000261	0.0513
Cluster of Collagen alpha-1(I) chain OS=Homo sapiens GN=COL1A1 PE=1 SV=5 (P02452)	Collagen alpha-1(I) chain OS=Homo sapiens GN=COL1A1 PE=1 SV=5	P02452	Uniprot_human_V1.fasta	138941	1	5	5	6	0.000782	0.0403
Cluster of Gelsolin OS=Homo sapiens GN=GSN PE=4 SV=1 (F5H1A8)	Gelsolin OS=Homo sapiens GN=GSN PE=4 SV=1	F5H1A8,P06396,P06396-2,P06396-3	Uniprot_human_V1.fasta	81484.9	1	6	6	6	0.000782	0.0812
Cluster of Histone H2A type 1 OS=Homo sapiens GN=HIST1H2AG PE=1 SV=2 (P0C0S8)	Histone H2A type 1 OS=Homo sapiens GN=HIST1H2AG PE=1 SV=2	P0C0S8,P20671,Q16777,Q6FI13,Q96KK5,Q99878,Q9BTM1,Q9BTM1-2	Uniprot_human_V1.fasta	14092.1	1	2	2	3	0.000391	0.154
Cluster of Fatty acid-binding protein, heart OS=Homo sapiens GN=FABP3 PE=1 SV=4 (P05413)	Fatty acid-binding protein, heart OS=Homo sapiens GN=FABP3 PE=1 SV=4	P05413	Uniprot_human_V1.fasta	14858.5	1	3	3	3	0.000391	0.263
Cluster of Keratin, type I cytoskeletal 16 OS=Homo sapiens GN=KRT16 PE=1 SV=4 (P08779)	Keratin, type I cytoskeletal 16 OS=Homo sapiens GN=KRT16 PE=1 SV=4	P08779	Uniprot_human_V1.fasta	51269	1	9	10	16	0.00209	0.374
Cluster of Protein S100-A4 OS=Homo sapiens GN=S100A4 PE=1 SV=1 (P26447)	Protein S100-A4 OS=Homo sapiens GN=S100A4 PE=1 SV=1	P26447	Uniprot_human_V1.fasta	11729	0.991	2	2	2	0.000261	0.188
Cluster of Collagen alpha-2(VI) chain OS=Homo sapiens GN=COL6A2 PE=1 SV=4 (P12110)	Collagen alpha-2(VI) chain OS=Homo sapiens GN=COL6A2 PE=1 SV=4	P12110	Uniprot_human_V1.fasta	108581	1	12	12	15	0.00196	0.154
Cluster of Heat shock protein HSP 90-alpha OS=Homo sapiens GN=HSP90AA1 PE=1 SV=5 (P07900)	Heat shock protein HSP 90-alpha OS=Homo sapiens GN=HSP90AA1 PE=1 SV=5	P07900,P07900-2	Uniprot_human_V1.fasta	84663.2	0.878	1	1	3	0.000391	0.0464
Cluster of Myosin-7 OS=Homo sapiens GN=MYH7 PE=1 SV=5 (P12883)	Myosin-10 OS=Homo sapiens GN=MYH10 PE=4 SV=1	F8VTL3,F8W6L6,P35580,P35580-2,P35580-3	Uniprot_human_V1.fasta	232534	0.94	1	1	4	0.000522	0.0159
Cluster of Transgelin (Fragment) OS=Homo sapiens GN=TAGLN PE=4 SV=1 (H0YCU9)	Transgelin (Fragment) OS=Homo sapiens GN=TAGLN PE=4 SV=1	H0YCU9,Q01995	Uniprot_human_V1.fasta	16844.3	1	2	2	2	0.000261	0.132
Cluster of Cartilage intermediate layer protein 1 OS=Homo sapiens GN=CILP PE=1 SV=4 (O75339)	Cartilage intermediate layer protein 1 OS=Homo sapiens GN=CILP PE=1 SV=4	O75339	Uniprot_human_V1.fasta	132565	1	7	7	8	0.00104	0.0845
Cluster of Collagen alpha-1(VI) chain OS=Homo sapiens GN=COL6A1 PE=1 SV=3 (P12109)	Collagen alpha-1(VI) chain OS=Homo sapiens GN=COL6A1 PE=1 SV=3	P12109	Uniprot_human_V1.fasta	108531	1	10	12	18	0.00235	0.117
Cluster of Complement component C9 OS=Homo sapiens GN=C9 PE=1 SV=2 (P02748)	Complement component C9 OS=Homo sapiens GN=C9 PE=1 SV=2	P02748	Uniprot_human_V1.fasta	63174.9	1	6	6	6	0.000782	0.093
Cluster of Beta-2-glycoprotein 1 (Fragment) OS=Homo sapiens GN=APOH PE=4 SV=1 (J3QRN2)	Beta-2-glycoprotein 1 (Fragment) OS=Homo sapiens GN=APOH PE=4 SV=1	J3QRN2,P02749	Uniprot_human_V1.fasta	19907.6	1	2	2	2	0.000261	0.171
Cluster of Inter-alpha-trypsin inhibitor heavy chain H2 OS=Homo sapiens GN=ITIH2 PE=1 SV=2 (P19823)	Inter-alpha-trypsin inhibitor heavy chain H2 OS=Homo sapiens GN=ITIH2 PE=1 SV=2	P19823,Q5T985	Uniprot_human_V1.fasta	106466	0.999	2	2	2	0.000261	0.0296
Cluster of Heat shock 70 kDa protein 1A/1B OS=Homo sapiens GN=HSPA1A PE=1 SV=5 (P08107)	Heat shock cognate 71 kDa protein OS=Homo sapiens GN=HSPA8 PE=3 SV=1	E9PKE3,E9PNE6,P11142,P11142-2,P54652	Uniprot_human_V1.fasta	68807.7	0.995	1	1	2	0.000261	0.0399
Cluster of Annexin A5 OS=Homo sapiens GN=ANXA5 PE=1 SV=2 (P08758)	Annexin A5 OS=Homo sapiens GN=ANXA5 PE=1 SV=2	P08758	Uniprot_human_V1.fasta	35938.6	1	4	4	4	0.000522	0.119
Cluster of Histone H3 OS=Homo sapiens GN=HIST2H3PS2 PE=3 SV=1 (Q5TEC6)	Histone H3 OS=Homo sapiens GN=HIST2H3PS2 PE=3 SV=1	Q5TEC6	Uniprot_human_V1.fasta	15430.7	0.999	1	1	4	0.000522	0.243
Cluster of Hemoglobin subunit alpha OS=Homo sapiens GN=HBA1 PE=1 SV=2 (P69905)	Hemoglobin subunit alpha OS=Homo sapiens GN=HBA1 PE=1 SV=2	P69905	Uniprot_human_V1.fasta	15257.6	1	3	3	4	0.000522	0.239
Cluster of Myoglobin (Fragment) OS=Homo sapiens GN=MB PE=3 SV=1 (B0QYF8)	Myoglobin (Fragment) OS=Homo sapiens GN=MB PE=3 SV=1	B0QYF8,P02144,Q8WVH6	Uniprot_human_V1.fasta	15989	0.848	2	2	2	0.000261	0.161
Cluster of Fibrinogen alpha chain OS=Homo sapiens GN=FGA PE=1 SV=2 (P02671)	Fibrinogen alpha chain OS=Homo sapiens GN=FGA PE=1 SV=2	P02671,P02671-2	Uniprot_human_V1.fasta	94973.4	1	7	8	8	0.00104	0.0808
Cluster of Fibronectin OS=Homo sapiens GN=FN1 PE=4 SV=1 (E9PE77)	Fibronectin OS=Homo sapiens GN=FN1 PE=4 SV=1	E9PE77,F8W7G7,P02751,P02751-15,P02751-3,P02751-5,P02751-7	Uniprot_human_V1.fasta	256494	1	27	27	27	0.00352	0.168
Cluster of Complement factor B Ba fragment OS=Homo sapiens GN=CFB PE=2 SV=1 (B4E1Z4)	Complement factor B Ba fragment OS=Homo sapiens GN=CFB PE=2 SV=1	B4E1Z4,E7ETN3,E7EVA3,H7C5H1,P00751	Uniprot_human_V1.fasta	140944	0.993	2	2	2	0.000261	0.0213
Cluster of Meteorin-like protein OS=Homo sapiens GN=METRNL PE=2 SV=1 (B3KSJ5)	Meteorin-like protein OS=Homo sapiens GN=METRNL PE=2 SV=1	B3KSJ5,Q641Q3	Uniprot_human_V1.fasta	25737.8	0.993	2	2	2	0.000261	0.105
Cluster of Actin, aortic smooth muscle OS=Homo sapiens GN=ACTA2 PE=1 SV=1 (P62736)	Actin, aortic smooth muscle OS=Homo sapiens GN=ACTA2 PE=1 SV=1	P62736,P68032	Uniprot_human_V1.fasta	42010.1	1	6	7	19	0.00248	0.385
Cluster of Proteoglycan 4 C-terminal part OS=Homo sapiens GN=PRG4 PE=4 SV=1 (E7EQ48)	Proteoglycan 4 C-terminal part OS=Homo sapiens GN=PRG4 PE=4 SV=1	E7EQ48,Q92954,Q92954-2,Q92954-3,Q92954-4,Q92954-5,Q92954-6	Uniprot_human_V1.fasta	102515	1	6	7	8	0.00104	0.0675
Cluster of Tenascin OS=Homo sapiens GN=TNC PE=4 SV=1 (E9PC84)	Tenascin OS=Homo sapiens GN=TNC PE=4 SV=1	E9PC84,J3QSU6,P24821,P24821-4	Uniprot_human_V1.fasta	210850	1	7	7	7	0.000913	0.0394
Cluster of Filamin-A OS=Homo sapiens GN=FLNA PE=1 SV=4 (P21333)	Filamin-A OS=Homo sapiens GN=FLNA PE=1 SV=4	P21333,P21333-2,Q5HY54	Uniprot_human_V1.fasta	280729	1	6	6	6	0.000782	0.0298
Cluster of Plasminogen OS=Homo sapiens GN=PLG PE=1 SV=2 (P00747)	Plasminogen OS=Homo sapiens GN=PLG PE=1 SV=2	P00747	Uniprot_human_V1.fasta	90567.4	1	10	11	11	0.00143	0.144
Cluster of Plectin OS=Homo sapiens GN=PLEC PE=1 SV=3 (Q15149)	Plectin OS=Homo sapiens GN=PLEC PE=1 SV=3	Q15149,Q15149-2,Q15149-3,Q15149-4,Q15149-5,Q15149-6,Q15149-7,Q15149-8,Q15149-9	Uniprot_human_V1.fasta	531784	0.996	3	3	3	0.000391	0.00875
Cluster of Transgelin-2 OS=Homo sapiens GN=TAGLN2 PE=1 SV=3 (P37802)	Transgelin-2 OS=Homo sapiens GN=TAGLN2 PE=1 SV=3	P37802	Uniprot_human_V1.fasta	22391.9	1	2	2	2	0.000261	0.116
Cluster of ATP synthase subunit beta OS=Homo sapiens GN=ATP5B PE=3 SV=1 (F8VPV9)	ATP synthase subunit beta OS=Homo sapiens GN=ATP5B PE=3 SV=1	F8VPV9,H0YH81,P06576	Uniprot_human_V1.fasta	55309.1	1	4	4	4	0.000522	0.127
Cluster of Endoplasmin OS=Homo sapiens GN=HSP90B1 PE=1 SV=1 (P14625)	Endoplasmin OS=Homo sapiens GN=HSP90B1 PE=1 SV=1	P14625	Uniprot_human_V1.fasta	92471.7	1	4	4	4	0.000522	0.0535
Cluster of Heat shock protein HSP 90-beta OS=Homo sapiens GN=HSP90AB1 PE=1 SV=4 (P08238)	Heat shock protein HSP 90-beta OS=Homo sapiens GN=HSP90AB1 PE=1 SV=4	P08238	Uniprot_human_V1.fasta	83267.3	0.981	1	1	3	0.000391	0.047
Cluster of Haptoglobin beta chain (Fragment) OS=Homo sapiens GN=HP PE=3 SV=1 (J3QLC9)	Haptoglobin beta chain (Fragment) OS=Homo sapiens GN=HP PE=3 SV=1	J3QLC9,P00738	Uniprot_human_V1.fasta	40779.7	1	7	8	9	0.00117	0.2
Cluster of HLA class II histocompatibility antigen, DRB1-16 beta chain (Fragment) OS=Homo sapiens GN=HLA-DRB1 PE=4 SV=1 (H0Y4M2)	HLA class II histocompatibility antigen, DRB1-16 beta chain (Fragment) OS=Homo sapiens GN=HLA-DRB1 PE=4 SV=1	H0Y4M2,P13761	Uniprot_human_V1.fasta	29048.1	0.973	2	2	2	0.000261	0.072
Cluster of Biglycan OS=Homo sapiens GN=BGN PE=2 SV=1 (A6NLG9)	Biglycan OS=Homo sapiens GN=BGN PE=2 SV=1	A6NLG9,P21810	Uniprot_human_V1.fasta	34877.2	1	10	12	13	0.00169	0.352
Cluster of Hemopexin OS=Homo sapiens GN=HPX PE=1 SV=2 (P02790)	Hemopexin OS=Homo sapiens GN=HPX PE=1 SV=2	P02790	Uniprot_human_V1.fasta	51676.5	1	5	5	5	0.000652	0.149
Cluster of Pyruvate kinase isozymes M1/M2 OS=Homo sapiens GN=PKM PE=1 SV=4 (P14618)	Pyruvate kinase isozymes M1/M2 OS=Homo sapiens GN=PKM PE=1 SV=4	P14618	Uniprot_human_V1.fasta	57937.5	1	8	8	9	0.00117	0.252
Cluster of Vimentin OS=Homo sapiens GN=VIM PE=1 SV=4 (P08670)	Vimentin OS=Homo sapiens GN=VIM PE=1 SV=4	P08670	Uniprot_human_V1.fasta	53652.7	1	23	25	33	0.0043	0.571
Cluster of Dihydropyrimidinase-related protein 3 OS=Homo sapiens GN=DPYSL3 PE=1 SV=1 (Q14195)	Dihydropyrimidinase-related protein 3 OS=Homo sapiens GN=DPYSL3 PE=1 SV=1	Q14195,Q14195-2	Uniprot_human_V1.fasta	61964.1	1	3	3	4	0.000522	0.086
Cluster of Vitronectin OS=Homo sapiens GN=VTN PE=1 SV=1 (P04004)	Vitronectin OS=Homo sapiens GN=VTN PE=1 SV=1	P04004	Uniprot_human_V1.fasta	54306.1	1	12	14	23	0.003	0.28
Cluster of Serotransferrin OS=Homo sapiens GN=TF PE=1 SV=3 (P02787)	Serotransferrin OS=Homo sapiens GN=TF PE=1 SV=3	P02787	Uniprot_human_V1.fasta	77064.3	1	12	12	12	0.00156	0.205
Cluster of Tubulin beta-4A chain OS=Homo sapiens GN=TUBB4A PE=1 SV=2 (P04350)	Tubulin beta chain OS=Homo sapiens GN=TUBB PE=3 SV=1	F8VUJ7,F8VW92,F8VYX6,P07437,Q5JP53	Uniprot_human_V1.fasta	46510.4	0.997	1	1	7	0.000913	0.169

## Sheet: training-3
Cluster	Protein name	Protein accession numbers	Database sources	Protein molecular weight (Da)	Protein identification probability	Exclusive unique peptide count	Exclusive unique spectrum count	Total spectrum count	Percentage of total spectra	Percentage sequence coverage
Cluster of Elongation factor 1-alpha 1 OS=Homo sapiens GN=EEF1A1 PE=1 SV=1 (P68104)	Elongation factor 1-alpha 1 OS=Homo sapiens GN=EEF1A1 PE=1 SV=1	P68104,Q5VTE0	Uniprot_human_V1.fasta	50141.2	1	3	3	3	0.000586	0.0671
Cluster of Keratin, type II cytoskeletal 2 epidermal OS=Homo sapiens GN=KRT2 PE=1 SV=2 (P35908)	Keratin, type II cytoskeletal 6C OS=Homo sapiens GN=KRT6C PE=1 SV=3	P48668	Uniprot_human_V1.fasta	60026.7	1	2	2	15	0.00293	0.248
Cluster of Versican core protein OS=Homo sapiens GN=VCAN PE=4 SV=2 (E9PF17)	Versican core protein OS=Homo sapiens GN=VCAN PE=4 SV=2	E9PF17,P13611,P13611-2,P13611-3,P13611-4,P13611-5	Uniprot_human_V1.fasta	176829	0.995	2	2	2	0.000391	0.0169
Cluster of Complement C3 OS=Homo sapiens GN=C3 PE=1 SV=2 (P01024)	Complement C3 OS=Homo sapiens GN=C3 PE=1 SV=2	P01024	Uniprot_human_V1.fasta	187149	1	3	3	3	0.000586	0.0156
Cluster of Metalloproteinase inhibitor 3 OS=Homo sapiens GN=TIMP3 PE=1 SV=2 (P35625)	Metalloproteinase inhibitor 3 OS=Homo sapiens GN=TIMP3 PE=1 SV=2	P35625	Uniprot_human_V1.fasta	24145.5	1	2	2	2	0.000391	0.0806
Cluster of Serum albumin OS=Homo sapiens GN=ALB PE=1 SV=2 (P02768)	Serum albumin OS=Homo sapiens GN=ALB PE=1 SV=2	P02768	Uniprot_human_V1.fasta	69366.9	1	4	4	4	0.000782	0.0657
Cluster of Tryptase beta-2 OS=Homo sapiens GN=TPSB2 PE=3 SV=1 (F8W8D0)	Tryptase beta-2 OS=Homo sapiens GN=TPSB2 PE=3 SV=1	F8W8D0,H3BMK9,J3QTS8,P20231,Q15661,Q15661-2	Uniprot_human_V1.fasta	30593.6	1	2	2	2	0.000391	0.102
Cluster of Trypstatin OS=Homo sapiens GN=AMBP PE=2 SV=1 (B7Z8R6)	Trypstatin OS=Homo sapiens GN=AMBP PE=2 SV=1	B7Z8R6,P02760	Uniprot_human_V1.fasta	29778.2	1	2	2	2	0.000391	0.0926
Cluster of LVV-hemorphin-7 (Fragment) OS=Homo sapiens GN=HBB PE=3 SV=1 (F8W6P5)	LVV-hemorphin-7 (Fragment) OS=Homo sapiens GN=HBB PE=3 SV=1	F8W6P5,P68871	Uniprot_human_V1.fasta	9670	1	2	3	6	0.00117	0.444
Cluster of Fibulin-2 OS=Homo sapiens GN=FBLN2 PE=4 SV=1 (F5H1F3)	Fibulin-2 OS=Homo sapiens GN=FBLN2 PE=4 SV=1	F5H1F3,P98095,P98095-2	Uniprot_human_V1.fasta	129452	1	4	4	4	0.000782	0.0281
Cluster of Myosin regulatory light chain 12A OS=Homo sapiens GN=MYL12A PE=4 SV=1 (J3QRS3)	Myosin regulatory light chain 12A OS=Homo sapiens GN=MYL12A PE=4 SV=1	J3QRS3,O14950,P19105	Uniprot_human_V1.fasta	20458.1	1	2	2	2	0.000391	0.113
Cluster of Fibrillin-1 OS=Homo sapiens GN=FBN1 PE=1 SV=3 (P35555)	Fibrillin-1 OS=Homo sapiens GN=FBN1 PE=1 SV=3	P35555	Uniprot_human_V1.fasta	312226	1	17	17	18	0.00352	0.0676
Cluster of Complement C1q subcomponent subunit C OS=Homo sapiens GN=C1QC PE=1 SV=3 (P02747)	Complement C1q subcomponent subunit C OS=Homo sapiens GN=C1QC PE=1 SV=3	P02747	Uniprot_human_V1.fasta	25774	1	3	3	3	0.000586	0.159
Cluster of Serum amyloid P-component OS=Homo sapiens GN=APCS PE=1 SV=2 (P02743)	Serum amyloid P-component OS=Homo sapiens GN=APCS PE=1 SV=2	P02743	Uniprot_human_V1.fasta	25387.7	1	8	8	9	0.00176	0.309
Cluster of Galectin-1 OS=Homo sapiens GN=LGALS1 PE=1 SV=2 (P09382)	Galectin-1 OS=Homo sapiens GN=LGALS1 PE=1 SV=2	P09382	Uniprot_human_V1.fasta	14715.8	0.999	2	2	2	0.000391	0.17
Cluster of Prolargin OS=Homo sapiens GN=PRELP PE=1 SV=1 (P51888)	Prolargin OS=Homo sapiens GN=PRELP PE=1 SV=1	P51888	Uniprot_human_V1.fasta	43812.4	1	4	4	4	0.000782	0.118
Cluster of Collagen alpha-2(I) chain OS=Homo sapiens GN=COL1A2 PE=1 SV=7 (P08123)	Collagen alpha-2(I) chain OS=Homo sapiens GN=COL1A2 PE=1 SV=7	P08123	Uniprot_human_V1.fasta	129315	1	4	4	4	0.000782	0.0344
Cluster of Actin, cytoplasmic 1 OS=Homo sapiens GN=ACTB PE=1 SV=1 (P60709)	Actin, gamma-enteric smooth muscle OS=Homo sapiens GN=ACTG2 PE=3 SV=1	E9PG30,P62736,P63267,P68032,P68133,Q5T8M7	Uniprot_human_V1.fasta	37084.5	0.999	1	1	5	0.000977	0.132
Cluster of Fibrinogen gamma chain OS=Homo sapiens GN=FGG PE=4 SV=1 (C9JC84)	Fibrinogen gamma chain OS=Homo sapiens GN=FGG PE=4 SV=1	C9JC84,C9JEU5,P02679,P02679-2	Uniprot_human_V1.fasta	52339.2	1	2	2	2	0.000391	0.0477
Cluster of Keratin, type II cytoskeletal 2 epidermal OS=Homo sapiens GN=KRT2 PE=1 SV=2 (P35908)	Keratin, type II cytoskeletal 5 OS=Homo sapiens GN=KRT5 PE=1 SV=3	P13647	Uniprot_human_V1.fasta	62379.6	1	8	8	13	0.00254	0.198
Cluster of Keratin, type I cytoskeletal 10 OS=Homo sapiens GN=KRT10 PE=1 SV=6 (P13645)	Keratin, type I cytoskeletal 10 OS=Homo sapiens GN=KRT10 PE=1 SV=6	P13645	Uniprot_human_V1.fasta	58828.8	1	17	18	22	0.0043	0.351
Cluster of Complement factor H OS=Homo sapiens GN=CFH PE=1 SV=4 (P08603)	Complement factor H OS=Homo sapiens GN=CFH PE=1 SV=4	P08603	Uniprot_human_V1.fasta	139096	1	2	2	2	0.000391	0.0162
Cluster of Actin, cytoplasmic 1 OS=Homo sapiens GN=ACTB PE=1 SV=1 (P60709)	Actin, cytoplasmic 1 OS=Homo sapiens GN=ACTB PE=1 SV=1	P60709,P63261	Uniprot_human_V1.fasta	41737.8	1	3	3	7	0.00137	0.2
Cluster of Keratin, type I cytoskeletal 9 OS=Homo sapiens GN=KRT9 PE=1 SV=3 (P35527)	Keratin, type I cytoskeletal 9 OS=Homo sapiens GN=KRT9 PE=1 SV=3	P35527	Uniprot_human_V1.fasta	62065.9	1	13	13	14	0.00274	0.274
Cluster of Apolipoprotein D (Fragment) OS=Homo sapiens GN=APOD PE=4 SV=1 (C9JF17)	Apolipoprotein D (Fragment) OS=Homo sapiens GN=APOD PE=4 SV=1	C9JF17,P05090	Uniprot_human_V1.fasta	24158.6	1	3	3	3	0.000586	0.158
Cluster of Ig gamma-2 chain C region OS=Homo sapiens GN=IGHG2 PE=1 SV=2 (P01859)	Ig gamma-2 chain C region OS=Homo sapiens GN=IGHG2 PE=1 SV=2	P01859	Uniprot_human_V1.fasta	35899.2	0.997	2	2	3	0.000586	0.0767
Cluster of Histone H2B OS=Homo sapiens GN=HIST2H2BF PE=2 SV=1 (B4DR52)	Histone H2B OS=Homo sapiens GN=HIST2H2BF PE=2 SV=1	B4DR52,O60814,P57053,P58876,P62807,Q5QNW6,Q5QNW6-2,Q93079,Q99877,Q99879,Q99880	Uniprot_human_V1.fasta	18041.3	1	2	2	4	0.000782	0.169
Cluster of Fibulin-1 OS=Homo sapiens GN=FBLN1 PE=1 SV=4 (P23142)	Fibulin-1 OS=Homo sapiens GN=FBLN1 PE=1 SV=4	P23142,P23142-3	Uniprot_human_V1.fasta	77211.6	1	3	3	4	0.000782	0.0555
Cluster of Apolipoprotein C-III OS=Homo sapiens GN=APOC3 PE=4 SV=1 (B0YIW2)	Apolipoprotein C-III OS=Homo sapiens GN=APOC3 PE=4 SV=1	B0YIW2,P02656	Uniprot_human_V1.fasta	12815.6	1	2	2	4	0.000782	0.162
Cluster of Apolipoprotein C-I OS=Homo sapiens GN=APOC1 PE=1 SV=1 (P02654)	Apolipoprotein C-I OS=Homo sapiens GN=APOC1 PE=1 SV=1	P02654	Uniprot_human_V1.fasta	9332.4	1	4	4	4	0.000782	0.373
Cluster of Basement membrane-specific heparan sulfate proteoglycan core protein OS=Homo sapiens GN=HSPG2 PE=1 SV=4 (P98160)	Basement membrane-specific heparan sulfate proteoglycan core protein OS=Homo sapiens GN=HSPG2 PE=1 SV=4	P98160	Uniprot_human_V1.fasta	468811	1	4	4	4	0.000782	0.0118
Cluster of Annexin (Fragment) OS=Homo sapiens GN=ANXA2 PE=3 SV=1 (H0YMD0)	Annexin (Fragment) OS=Homo sapiens GN=ANXA2 PE=3 SV=1	H0YMD0,H0YMU9,H0YN42,P07355,P07355-2	Uniprot_human_V1.fasta	25342.9	1	6	6	6	0.00117	0.286
Cluster of Fibrinogen beta chain OS=Homo sapiens GN=FGB PE=4 SV=1 (D6REL8)	Fibrinogen beta chain OS=Homo sapiens GN=FGB PE=4 SV=1	D6REL8,P02675	Uniprot_human_V1.fasta	55928.6	1	3	4	4	0.000782	0.147
Cluster of Keratin, type II cytoskeletal 1 OS=Homo sapiens GN=KRT1 PE=1 SV=6 (P04264)	Keratin, type II cytoskeletal 1 OS=Homo sapiens GN=KRT1 PE=1 SV=6	P04264	Uniprot_human_V1.fasta	66040.3	1	24	24	33	0.00645	0.469
Cluster of Apolipoprotein E OS=Homo sapiens GN=APOE PE=1 SV=1 (P02649)	Apolipoprotein E OS=Homo sapiens GN=APOE PE=1 SV=1	P02649	Uniprot_human_V1.fasta	36153.5	1	10	10	10	0.00195	0.271
Cluster of Apolipoprotein A-I OS=Homo sapiens GN=APOA1 PE=1 SV=1 (P02647)	Apolipoprotein A-I OS=Homo sapiens GN=APOA1 PE=1 SV=1	P02647	Uniprot_human_V1.fasta	30778.5	1	14	14	15	0.00293	0.408
Cluster of Ig kappa chain C region OS=Homo sapiens GN=IGKC PE=1 SV=1 (P01834)	Ig kappa chain C region OS=Homo sapiens GN=IGKC PE=1 SV=1	P01834	Uniprot_human_V1.fasta	11608.6	1	4	5	9	0.00176	0.642
Cluster of Keratin, type II cytoskeletal 2 epidermal OS=Homo sapiens GN=KRT2 PE=1 SV=2 (P35908)	Keratin, type II cytoskeletal 6B OS=Homo sapiens GN=KRT6B PE=1 SV=5	P04259	Uniprot_human_V1.fasta	60068.6	1	1	1	14	0.00274	0.218
Cluster of Transforming growth factor-beta-induced protein ig-h3 OS=Homo sapiens GN=TGFBI PE=4 SV=1 (G8JLA8)	Transforming growth factor-beta-induced protein ig-h3 OS=Homo sapiens GN=TGFBI PE=4 SV=1	G8JLA8,H0Y8L3,Q15582	Uniprot_human_V1.fasta	74695.8	1	3	3	3	0.000586	0.0556
Cluster of Thrombospondin-4 OS=Homo sapiens GN=THBS4 PE=4 SV=1 (E7ES19)	Thrombospondin-4 OS=Homo sapiens GN=THBS4 PE=4 SV=1	E7ES19,P35443	Uniprot_human_V1.fasta	96005.3	1	4	4	7	0.00137	0.108
Cluster of Collagen alpha-3(VI) chain OS=Homo sapiens GN=COL6A3 PE=4 SV=1 (E9PCV6)	Collagen alpha-3(VI) chain OS=Homo sapiens GN=COL6A3 PE=4 SV=1	E9PCV6,P12111,P12111-2	Uniprot_human_V1.fasta	321999	1	29	30	30	0.00586	0.114
Cluster of Collagen alpha-1(XII) chain OS=Homo sapiens GN=COL12A1 PE=4 SV=1 (D6RGG3)	Collagen alpha-1(XII) chain OS=Homo sapiens GN=COL12A1 PE=4 SV=1	D6RGG3,Q99715,Q99715-2,Q99715-4	Uniprot_human_V1.fasta	333200	1	11	11	11	0.00215	0.0421
Cluster of Clusterin OS=Homo sapiens GN=CLU PE=1 SV=1 (P10909)	Clusterin OS=Homo sapiens GN=CLU PE=1 SV=1	P10909,P10909-2,P10909-4,P10909-5	Uniprot_human_V1.fasta	52495	1	7	7	7	0.00137	0.187
Cluster of Thrombospondin-4 OS=Homo sapiens GN=THBS4 PE=4 SV=1 (E7ES19)	Cartilage oligomeric matrix protein OS=Homo sapiens GN=COMP PE=2 SV=1	B4DKJ3,G3XAP6,P49747	Uniprot_human_V1.fasta	77211.8	0.999	2	2	5	0.000977	0.0824
Cluster of Keratin, type II cytoskeletal 2 epidermal OS=Homo sapiens GN=KRT2 PE=1 SV=2 (P35908)	Keratin, type II cytoskeletal 2 epidermal OS=Homo sapiens GN=KRT2 PE=1 SV=2	P35908	Uniprot_human_V1.fasta	65433.9	1	10	10	18	0.00352	0.269
Cluster of Prelamin-A/C OS=Homo sapiens GN=LMNA PE=1 SV=1 (P02545)	Prelamin-A/C OS=Homo sapiens GN=LMNA PE=1 SV=1	P02545	Uniprot_human_V1.fasta	74140.7	1	5	5	5	0.000977	0.0858
Cluster of LVV-hemorphin-7 (Fragment) OS=Homo sapiens GN=HBB PE=3 SV=1 (F8W6P5)	Hemoglobin subunit delta (Fragment) OS=Homo sapiens GN=HBD PE=3 SV=1	E9PEW8,E9PFT6,P02042	Uniprot_human_V1.fasta	11345.8	0.999	1	1	3	0.000586	0.298
Cluster of Keratin, type I cytoskeletal 14 OS=Homo sapiens GN=KRT14 PE=1 SV=4 (P02533)	Keratin, type I cytoskeletal 14 OS=Homo sapiens GN=KRT14 PE=1 SV=4	P02533	Uniprot_human_V1.fasta	51562.5	1	9	9	20	0.00391	0.432
Cluster of Histone H4 OS=Homo sapiens GN=HIST1H4A PE=1 SV=2 (P62805)	Histone H4 OS=Homo sapiens GN=HIST1H4A PE=1 SV=2	P62805	Uniprot_human_V1.fasta	11367.7	1	3	3	4	0.000782	0.291
Cluster of Histone H2B OS=Homo sapiens GN=HIST2H2BF PE=2 SV=1 (B4DR52)	Histone H2B type 1-J OS=Homo sapiens GN=HIST1H2BJ PE=1 SV=3	P06899,P23527,P33778,Q16778	Uniprot_human_V1.fasta	13904.7	0.981	1	1	3	0.000586	0.222
Cluster of Complement component C4B (Childo blood group) OS=Homo sapiens GN=C4B-1 PE=4 SV=1 (A2BHY4)	Complement component C4B (Childo blood group) OS=Homo sapiens GN=C4B-1 PE=4 SV=1	A2BHY4,A6H8M8,B0UZ83,B0V2C8,F5GXS0,F8VNV9,F8VSI2,F8VW91,F8VX64,F8VZD8,P0C0L4,P0C0L5,Q5JNX2,Q6U2E9	Uniprot_human_V1.fasta	192799	1	2	2	2	0.000391	0.012
Cluster of Carboxypeptidase B2 OS=Homo sapiens GN=CPB2 PE=1 SV=2 (Q96IY4)	Carboxypeptidase B2 OS=Homo sapiens GN=CPB2 PE=1 SV=2	Q96IY4	Uniprot_human_V1.fasta	48424.7	1	3	3	3	0.000586	0.0733
Cluster of Vimentin OS=Homo sapiens GN=VIM PE=1 SV=4 (P08670)	Desmin OS=Homo sapiens GN=DES PE=1 SV=3	P17661	Uniprot_human_V1.fasta	53536.6	0.998	1	1	5	0.000977	0.083
Cluster of Prolow-density lipoprotein receptor-related protein 1 OS=Homo sapiens GN=LRP1 PE=1 SV=2 (Q07954)	Prolow-density lipoprotein receptor-related protein 1 OS=Homo sapiens GN=LRP1 PE=1 SV=2	Q07954	Uniprot_human_V1.fasta	504592	1	3	3	3	0.000586	0.00858
Cluster of Histone H1.3 OS=Homo sapiens GN=HIST1H1D PE=1 SV=2 (P16402)	Histone H1.3 OS=Homo sapiens GN=HIST1H1D PE=1 SV=2	P16402	Uniprot_human_V1.fasta	22351.3	1	2	2	2	0.000391	0.0905
Cluster of Dermatopontin OS=Homo sapiens GN=DPT PE=2 SV=2 (Q07507)	Dermatopontin OS=Homo sapiens GN=DPT PE=2 SV=2	Q07507	Uniprot_human_V1.fasta	24004.7	1	2	2	3	0.000586	0.139
Cluster of Complement component C9 OS=Homo sapiens GN=C9 PE=1 SV=2 (P02748)	Complement component C9 OS=Homo sapiens GN=C9 PE=1 SV=2	P02748	Uniprot_human_V1.fasta	63174.9	1	5	5	5	0.000977	0.093
Cluster of Lactadherin OS=Homo sapiens GN=MFGE8 PE=4 SV=1 (F5GZN3)	Lactadherin OS=Homo sapiens GN=MFGE8 PE=4 SV=1	F5GZN3,F5H7N9,Q08431,Q08431-2	Uniprot_human_V1.fasta	38343.8	1	2	3	3	0.000586	0.0612
Cluster of Dermcidin OS=Homo sapiens GN=DCD PE=1 SV=2 (P81605)	Dermcidin OS=Homo sapiens GN=DCD PE=1 SV=2	P81605,P81605-2	Uniprot_human_V1.fasta	11284.1	1	2	2	2	0.000391	0.127
Cluster of Apolipoprotein A-IV OS=Homo sapiens GN=APOA4 PE=1 SV=3 (P06727)	Apolipoprotein A-IV OS=Homo sapiens GN=APOA4 PE=1 SV=3	P06727	Uniprot_human_V1.fasta	45399.4	1	12	12	12	0.00235	0.303
Cluster of Keratin, type I cytoskeletal 14 OS=Homo sapiens GN=KRT14 PE=1 SV=4 (P02533)	Protein KRT17P1 OS=Homo sapiens GN=KRT17P1 PE=3 SV=1	A8MW45	Uniprot_human_V1.fasta	48519.3	0.999	2	2	5	0.000977	0.0952
Cluster of Collagen alpha-1(I) chain OS=Homo sapiens GN=COL1A1 PE=1 SV=5 (P02452)	Collagen alpha-1(I) chain OS=Homo sapiens GN=COL1A1 PE=1 SV=5	P02452	Uniprot_human_V1.fasta	138941	1	3	3	3	0.000586	0.0219
Cluster of Keratin, type I cytoskeletal 14 OS=Homo sapiens GN=KRT14 PE=1 SV=4 (P02533)	Keratin, type I cytoskeletal 16 OS=Homo sapiens GN=KRT16 PE=1 SV=4	P08779	Uniprot_human_V1.fasta	51269	1	8	8	19	0.00371	0.359
Cluster of Collagen alpha-2(VI) chain OS=Homo sapiens GN=COL6A2 PE=1 SV=4 (P12110)	Collagen alpha-2(VI) chain OS=Homo sapiens GN=COL6A2 PE=1 SV=4	P12110	Uniprot_human_V1.fasta	108581	1	7	7	7	0.00137	0.0746
Cluster of Hemoglobin subunit alpha OS=Homo sapiens GN=HBA1 PE=1 SV=2 (P69905)	Hemoglobin subunit alpha OS=Homo sapiens GN=HBA1 PE=1 SV=2	P69905	Uniprot_human_V1.fasta	15257.6	1	4	4	4	0.000782	0.345
Cluster of Cartilage intermediate layer protein 1 OS=Homo sapiens GN=CILP PE=1 SV=4 (O75339)	Cartilage intermediate layer protein 1 OS=Homo sapiens GN=CILP PE=1 SV=4	O75339	Uniprot_human_V1.fasta	132565	1	3	3	3	0.000586	0.0296
Cluster of Collagen alpha-1(VI) chain OS=Homo sapiens GN=COL6A1 PE=1 SV=3 (P12109)	Collagen alpha-1(VI) chain OS=Homo sapiens GN=COL6A1 PE=1 SV=3	P12109	Uniprot_human_V1.fasta	108531	1	6	6	7	0.00137	0.0642
Cluster of Collagen alpha-1(XIV) chain OS=Homo sapiens GN=COL14A1 PE=1 SV=3 (Q05707)	Collagen alpha-1(XIV) chain OS=Homo sapiens GN=COL14A1 PE=1 SV=3	Q05707,Q05707-2	Uniprot_human_V1.fasta	193516	1	7	7	7	0.00137	0.0507
Cluster of Ig kappa chain V-IV region Len OS=Homo sapiens PE=1 SV=2 (P01625)	Ig kappa chain V-IV region Len OS=Homo sapiens PE=1 SV=2	P01625	Uniprot_human_V1.fasta	12640.4	1	2	2	4	0.000782	0.219
Cluster of Fibrinogen alpha chain OS=Homo sapiens GN=FGA PE=1 SV=2 (P02671)	Fibrinogen alpha chain OS=Homo sapiens GN=FGA PE=1 SV=2	P02671,P02671-2	Uniprot_human_V1.fasta	94973.4	1	7	7	7	0.00137	0.11
Cluster of Fibronectin OS=Homo sapiens GN=FN1 PE=4 SV=1 (E9PE77)	Fibronectin OS=Homo sapiens GN=FN1 PE=4 SV=1	E9PE77,F8W7G7,P02751,P02751-10,P02751-11,P02751-12,P02751-13,P02751-14,P02751-15,P02751-3,P02751-5,P02751-7,P02751-8,P02751-9	Uniprot_human_V1.fasta	256494	1	6	6	6	0.00117	0.0373
Cluster of Tenascin OS=Homo sapiens GN=TNC PE=4 SV=1 (E9PC84)	Tenascin OS=Homo sapiens GN=TNC PE=4 SV=1	E9PC84,F5H7V9,J3QSU6,P24821,P24821-2,P24821-3,P24821-4,P24821-5,P24821-6	Uniprot_human_V1.fasta	210850	1	5	5	5	0.000977	0.0306
Cluster of Plasminogen OS=Homo sapiens GN=PLG PE=1 SV=2 (P00747)	Plasminogen OS=Homo sapiens GN=PLG PE=1 SV=2	P00747	Uniprot_human_V1.fasta	90567.4	1	6	6	6	0.00117	0.104
Cluster of Histone H3 OS=Homo sapiens GN=HIST2H3PS2 PE=3 SV=1 (Q5TEC6)	Histone H3 OS=Homo sapiens GN=HIST2H3PS2 PE=3 SV=1	Q5TEC6	Uniprot_human_V1.fasta	15430.7	0.998	3	3	3	0.000586	0.199
Cluster of Pigment epithelium-derived factor OS=Homo sapiens GN=SERPINF1 PE=1 SV=4 (P36955)	Pigment epithelium-derived factor OS=Homo sapiens GN=SERPINF1 PE=1 SV=4	P36955	Uniprot_human_V1.fasta	46314.3	1	4	4	4	0.000782	0.0933
Cluster of Biglycan OS=Homo sapiens GN=BGN PE=2 SV=1 (A6NLG9)	Biglycan OS=Homo sapiens GN=BGN PE=2 SV=1	A6NLG9,P21810	Uniprot_human_V1.fasta	34877.2	1	4	4	5	0.000977	0.114
Cluster of Vimentin OS=Homo sapiens GN=VIM PE=1 SV=4 (P08670)	Vimentin OS=Homo sapiens GN=VIM PE=1 SV=4	P08670	Uniprot_human_V1.fasta	53652.7	1	22	23	29	0.00567	0.554
Cluster of Vitronectin OS=Homo sapiens GN=VTN PE=1 SV=1 (P04004)	Vitronectin OS=Homo sapiens GN=VTN PE=1 SV=1	P04004	Uniprot_human_V1.fasta	54306.1	1	6	6	8	0.00156	0.115
Cluster of C4b-binding protein alpha chain OS=Homo sapiens GN=C4BPA PE=1 SV=2 (P04003)	C4b-binding protein alpha chain OS=Homo sapiens GN=C4BPA PE=1 SV=2	P04003	Uniprot_human_V1.fasta	67033	1	8	8	8	0.00156	0.189

## Sheet: training-4
Cluster	Protein name	Protein accession numbers	Database sources	Protein molecular weight (Da)	Protein identification probability	Exclusive unique peptide count	Exclusive unique spectrum count	Total spectrum count	Percentage of total spectra	Percentage sequence coverage
Cluster of Elongation factor 1-alpha 1 OS=Homo sapiens GN=EEF1A1 PE=1 SV=1 (P68104)	Elongation factor 1-alpha 1 OS=Homo sapiens GN=EEF1A1 PE=1 SV=1	P68104,Q05639,Q5VTE0	Uniprot_human_V1.fasta	50141.2	1	3	3	3	0.000545	0.0649
Cluster of Complement C5 OS=Homo sapiens GN=C5 PE=1 SV=4 (P01031)	Complement C5 OS=Homo sapiens GN=C5 PE=1 SV=4	P01031	Uniprot_human_V1.fasta	188309	0.926	2	2	2	0.000363	0.0119
Cluster of N-acetylmuramoyl-L-alanine amidase OS=Homo sapiens GN=PGLYRP2 PE=1 SV=1 (Q96PD5)	N-acetylmuramoyl-L-alanine amidase OS=Homo sapiens GN=PGLYRP2 PE=1 SV=1	Q96PD5,Q96PD5-2	Uniprot_human_V1.fasta	62217.9	1	3	3	3	0.000545	0.0538
Cluster of Desmoplakin OS=Homo sapiens GN=DSP PE=1 SV=3 (P15924)	Desmoplakin OS=Homo sapiens GN=DSP PE=1 SV=3	P15924,P15924-2	Uniprot_human_V1.fasta	331781	0.999	2	2	2	0.000363	0.00731
Cluster of Tenascin-X OS=Homo sapiens GN=TNXB PE=1 SV=3 (P22105)	Tenascin-X OS=Homo sapiens GN=TNXB PE=1 SV=3	P22105	Uniprot_human_V1.fasta	464307	1	7	7	7	0.00127	0.0201
Cluster of Complement C3 OS=Homo sapiens GN=C3 PE=1 SV=2 (P01024)	Complement C3 OS=Homo sapiens GN=C3 PE=1 SV=2	P01024	Uniprot_human_V1.fasta	187149	1	8	8	8	0.00145	0.0421
Cluster of Protein DJ-1 OS=Homo sapiens GN=PARK7 PE=1 SV=2 (Q99497)	Protein DJ-1 OS=Homo sapiens GN=PARK7 PE=1 SV=2	Q99497	Uniprot_human_V1.fasta	19891.2	0.998	2	2	2	0.000363	0.0847
Cluster of Metalloproteinase inhibitor 3 OS=Homo sapiens GN=TIMP3 PE=1 SV=2 (P35625)	Metalloproteinase inhibitor 3 OS=Homo sapiens GN=TIMP3 PE=1 SV=2	P35625	Uniprot_human_V1.fasta	24145.5	1	3	3	3	0.000545	0.118
Cluster of Serum albumin OS=Homo sapiens GN=ALB PE=1 SV=2 (P02768)	Serum albumin OS=Homo sapiens GN=ALB PE=1 SV=2	P02768	Uniprot_human_V1.fasta	69366.9	1	15	15	15	0.00272	0.251
Cluster of Trypstatin OS=Homo sapiens GN=AMBP PE=2 SV=1 (B7Z8R6)	Trypstatin OS=Homo sapiens GN=AMBP PE=2 SV=1	B7Z8R6,P02760	Uniprot_human_V1.fasta	29778.2	1	3	3	3	0.000545	0.0778
Cluster of Alpha-1-antichymotrypsin His-Pro-less OS=Homo sapiens GN=SERPINA3 PE=3 SV=1 (G3V5I3)	Alpha-1-antichymotrypsin His-Pro-less OS=Homo sapiens GN=SERPINA3 PE=3 SV=1	G3V5I3,P01011	Uniprot_human_V1.fasta	50600.5	1	5	5	5	0.000908	0.123
Cluster of Ig kappa chain C region OS=Homo sapiens GN=IGKC PE=1 SV=1 (P01834)	Ig kappa chain C region OS=Homo sapiens GN=IGKC PE=1 SV=1	P01834	Uniprot_human_V1.fasta	11608.6	1	3	3	3	0.000545	0.481
Cluster of Tubulin beta-4B chain OS=Homo sapiens GN=TUBB4B PE=1 SV=1 (P68371)	Tubulin beta-4B chain OS=Homo sapiens GN=TUBB4B PE=1 SV=1	P68371	Uniprot_human_V1.fasta	49830.7	1	5	5	5	0.000908	0.115
Cluster of Alpha-1-antitrypsin OS=Homo sapiens GN=SERPINA1 PE=1 SV=3 (P01009)	Alpha-1-antitrypsin OS=Homo sapiens GN=SERPINA1 PE=1 SV=3	P01009	Uniprot_human_V1.fasta	46737.9	1	4	4	4	0.000726	0.105
Cluster of EMILIN-1 OS=Homo sapiens GN=EMILIN1 PE=1 SV=2 (Q9Y6C2)	EMILIN-1 OS=Homo sapiens GN=EMILIN1 PE=1 SV=2	Q9Y6C2	Uniprot_human_V1.fasta	106667	1	6	6	6	0.00109	0.0778
Cluster of ITIH4 protein OS=Homo sapiens GN=ITIH4 PE=2 SV=1 (B7ZKJ8)	ITIH4 protein OS=Homo sapiens GN=ITIH4 PE=2 SV=1	B7ZKJ8,E9PGN5,Q14624,Q14624-2	Uniprot_human_V1.fasta	103882	1	8	8	8	0.00145	0.0973
Cluster of Fibrillin-1 OS=Homo sapiens GN=FBN1 PE=1 SV=3 (P35555)	Fibrillin-1 OS=Homo sapiens GN=FBN1 PE=1 SV=3	P35555	Uniprot_human_V1.fasta	312226	1	18	18	18	0.00327	0.0634
Cluster of Complement C1q subcomponent subunit C OS=Homo sapiens GN=C1QC PE=1 SV=3 (P02747)	Complement C1q subcomponent subunit C OS=Homo sapiens GN=C1QC PE=1 SV=3	P02747	Uniprot_human_V1.fasta	25774	1	3	3	3	0.000545	0.139
Cluster of Complement C1q subcomponent subunit B OS=Homo sapiens GN=C1QB PE=4 SV=1 (D6R934)	Complement C1q subcomponent subunit B OS=Homo sapiens GN=C1QB PE=4 SV=1	D6R934,D6RA08,P02746	Uniprot_human_V1.fasta	26460.4	1	4	4	4	0.000726	0.124
Cluster of Serum amyloid P-component OS=Homo sapiens GN=APCS PE=1 SV=2 (P02743)	Serum amyloid P-component OS=Homo sapiens GN=APCS PE=1 SV=2	P02743	Uniprot_human_V1.fasta	25387.7	1	10	11	16	0.0029	0.368
Cluster of Heat shock protein beta-6 OS=Homo sapiens GN=HSPB6 PE=1 SV=2 (O14558)	Heat shock protein beta-6 OS=Homo sapiens GN=HSPB6 PE=1 SV=2	O14558	Uniprot_human_V1.fasta	17135.2	1	2	2	2	0.000363	0.131
Cluster of Glyceraldehyde-3-phosphate dehydrogenase OS=Homo sapiens GN=GAPDH PE=3 SV=1 (E7EUT4)	Glyceraldehyde-3-phosphate dehydrogenase OS=Homo sapiens GN=GAPDH PE=3 SV=1	E7EUT4,E7EUT5,P04406	Uniprot_human_V1.fasta	31548	1	2	2	2	0.000363	0.0751
Cluster of Profilin-1 OS=Homo sapiens GN=PFN1 PE=1 SV=2 (P07737)	Profilin-1 OS=Homo sapiens GN=PFN1 PE=1 SV=2	P07737	Uniprot_human_V1.fasta	15054.3	0.999	2	2	2	0.000363	0.2
Cluster of Galectin-1 OS=Homo sapiens GN=LGALS1 PE=1 SV=2 (P09382)	Galectin-1 OS=Homo sapiens GN=LGALS1 PE=1 SV=2	P09382	Uniprot_human_V1.fasta	14715.8	1	3	3	3	0.000545	0.23
Cluster of Prolargin OS=Homo sapiens GN=PRELP PE=1 SV=1 (P51888)	Prolargin OS=Homo sapiens GN=PRELP PE=1 SV=1	P51888	Uniprot_human_V1.fasta	43812.4	1	2	2	2	0.000363	0.0524
Cluster of Histone H4 OS=Homo sapiens GN=HIST1H4A PE=1 SV=2 (P62805)	Histone H4 OS=Homo sapiens GN=HIST1H4A PE=1 SV=2	P62805	Uniprot_human_V1.fasta	11367.7	1	2	2	2	0.000363	0.194
Cluster of Heat shock protein beta-1 OS=Homo sapiens GN=HSPB1 PE=4 SV=1 (F8WE04)	Heat shock protein beta-1 OS=Homo sapiens GN=HSPB1 PE=4 SV=1	F8WE04,P04792	Uniprot_human_V1.fasta	20406.5	0.989	2	2	2	0.000363	0.0968
Cluster of Ig alpha-2 chain C region OS=Homo sapiens GN=IGHA2 PE=1 SV=3 (P01877)	Ig alpha-2 chain C region OS=Homo sapiens GN=IGHA2 PE=1 SV=3	P01877	Uniprot_human_V1.fasta	36525.3	1	2	2	13	0.00236	0.332
Cluster of Ig alpha-2 chain C region OS=Homo sapiens GN=IGHA2 PE=1 SV=3 (P01877)	Ig alpha-1 chain C region OS=Homo sapiens GN=IGHA1 PE=1 SV=2	P01876	Uniprot_human_V1.fasta	37653.8	1	2	2	11	0.002	0.266
Cluster of Fibrinogen gamma chain OS=Homo sapiens GN=FGG PE=4 SV=1 (C9JC84)	Fibrinogen gamma chain OS=Homo sapiens GN=FGG PE=4 SV=1	C9JC84,C9JEU5,P02679,P02679-2	Uniprot_human_V1.fasta	52339.2	1	3	3	3	0.000545	0.0672
Cluster of Keratin, type II cytoskeletal 2 epidermal OS=Homo sapiens GN=KRT2 PE=1 SV=2 (P35908)	Keratin, type II cytoskeletal 5 OS=Homo sapiens GN=KRT5 PE=1 SV=3	P13647	Uniprot_human_V1.fasta	62379.6	1	10	10	20	0.00363	0.229
Cluster of Keratin, type I cytoskeletal 10 OS=Homo sapiens GN=KRT10 PE=1 SV=6 (P13645)	Keratin, type I cytoskeletal 10 OS=Homo sapiens GN=KRT10 PE=1 SV=6	P13645	Uniprot_human_V1.fasta	58828.8	1	20	22	29	0.00526	0.378
Cluster of Complement factor H OS=Homo sapiens GN=CFH PE=1 SV=4 (P08603)	Complement factor H OS=Homo sapiens GN=CFH PE=1 SV=4	P08603	Uniprot_human_V1.fasta	139096	1	3	3	5	0.000908	0.0471
Cluster of Actin, aortic smooth muscle OS=Homo sapiens GN=ACTA2 PE=1 SV=1 (P62736)	Actin, cytoplasmic 1 OS=Homo sapiens GN=ACTB PE=1 SV=1	P60709,P63261	Uniprot_human_V1.fasta	41737.8	1	3	3	14	0.00254	0.285
Cluster of Ig gamma-3 chain C region OS=Homo sapiens GN=IGHG3 PE=1 SV=2 (P01860)	Ig gamma-3 chain C region OS=Homo sapiens GN=IGHG3 PE=1 SV=2	P01860	Uniprot_human_V1.fasta	41285.9	0.997	1	1	4	0.000726	0.119
Cluster of Keratin, type I cytoskeletal 9 OS=Homo sapiens GN=KRT9 PE=1 SV=3 (P35527)	Keratin, type I cytoskeletal 9 OS=Homo sapiens GN=KRT9 PE=1 SV=3	P35527	Uniprot_human_V1.fasta	62065.9	1	10	10	11	0.002	0.167
Cluster of Myeloperoxidase OS=Homo sapiens GN=MPO PE=1 SV=1 (P05164)	Myeloperoxidase OS=Homo sapiens GN=MPO PE=1 SV=1	P05164,P05164-2,P05164-3	Uniprot_human_V1.fasta	83871.1	1	4	4	4	0.000726	0.0523
Cluster of Heat shock 70 kDa protein 1A/1B OS=Homo sapiens GN=HSPA1A PE=1 SV=5 (P08107)	Heat shock 70 kDa protein 1A/1B OS=Homo sapiens GN=HSPA1A PE=1 SV=5	P08107	Uniprot_human_V1.fasta	70054	1	3	3	5	0.000908	0.101
Cluster of Histone H2B type 1-J OS=Homo sapiens GN=HIST1H2BJ PE=1 SV=3 (P06899)	Histone H2B type 1-K OS=Homo sapiens GN=HIST1H2BK PE=1 SV=3	O60814,P57053,P58876,P62807,Q93079,Q99877,Q99880	Uniprot_human_V1.fasta	13890.6	0.999	1	1	4	0.000726	0.238
Cluster of Ig gamma-3 chain C region OS=Homo sapiens GN=IGHG3 PE=1 SV=2 (P01860)	Ig gamma-1 chain C region OS=Homo sapiens GN=IGHG1 PE=1 SV=1	P01857	Uniprot_human_V1.fasta	36105	0.912	1	1	4	0.000726	0.158
Cluster of Fibulin-1 OS=Homo sapiens GN=FBLN1 PE=1 SV=4 (P23142)	Fibulin 1 OS=Homo sapiens GN=FBLN1 PE=4 SV=1	B1AHL2,P23142-4	Uniprot_human_V1.fasta	78327.1	1	2	2	15	0.00272	0.204
Cluster of Fibulin-1 OS=Homo sapiens GN=FBLN1 PE=1 SV=4 (P23142)	Fibulin-1 OS=Homo sapiens GN=FBLN1 PE=1 SV=4	P23142,P23142-3	Uniprot_human_V1.fasta	77211.6	1	3	3	17	0.00309	0.198
Cluster of Matrix Gla protein OS=Homo sapiens GN=MGP PE=4 SV=1 (J3KMX7)	Matrix Gla protein OS=Homo sapiens GN=MGP PE=4 SV=1	J3KMX7,P08493	Uniprot_human_V1.fasta	15325.8	0.999	2	2	2	0.000363	0.188
Cluster of 78 kDa glucose-regulated protein OS=Homo sapiens GN=HSPA5 PE=1 SV=2 (P11021)	78 kDa glucose-regulated protein OS=Homo sapiens GN=HSPA5 PE=1 SV=2	P11021	Uniprot_human_V1.fasta	72334.7	0.999	1	1	2	0.000363	0.0382
Cluster of Apolipoprotein C-I OS=Homo sapiens GN=APOC1 PE=1 SV=1 (P02654)	Apolipoprotein C-I OS=Homo sapiens GN=APOC1 PE=1 SV=1	P02654	Uniprot_human_V1.fasta	9332.4	1	3	3	3	0.000545	0.349
Cluster of Plasma kallikrein light chain OS=Homo sapiens GN=KLKB1 PE=3 SV=1 (E9PBC5)	Plasma kallikrein light chain OS=Homo sapiens GN=KLKB1 PE=3 SV=1	E9PBC5,H0YAC1,P03952	Uniprot_human_V1.fasta	61838.9	1	2	2	2	0.000363	0.038
Cluster of Coiled-coil domain-containing protein 80 OS=Homo sapiens GN=CCDC80 PE=1 SV=1 (Q76M96)	Coiled-coil domain-containing protein 80 OS=Homo sapiens GN=CCDC80 PE=1 SV=1	Q76M96,Q76M96-2	Uniprot_human_V1.fasta	108176	0.998	2	2	2	0.000363	0.0242
Cluster of C4b-binding protein beta chain OS=Homo sapiens GN=C4BPB PE=1 SV=1 (P20851)	C4b-binding protein beta chain OS=Homo sapiens GN=C4BPB PE=1 SV=1	P20851,P20851-2	Uniprot_human_V1.fasta	28357.2	1	2	2	2	0.000363	0.0833
Cluster of Lysozyme C OS=Homo sapiens GN=LYZ PE=1 SV=1 (P61626)	Lysozyme C OS=Homo sapiens GN=LYZ PE=1 SV=1	P61626	Uniprot_human_V1.fasta	16536.9	1	4	4	4	0.000726	0.23
Cluster of Keratin, type II cytoskeletal 1 OS=Homo sapiens GN=KRT1 PE=1 SV=6 (P04264)	Keratin, type II cytoskeletal 1 OS=Homo sapiens GN=KRT1 PE=1 SV=6	P04264	Uniprot_human_V1.fasta	66040.3	1	20	21	35	0.00635	0.363
Cluster of Ubiquitin OS=Homo sapiens GN=UBB PE=2 SV=1 (B4DV12)	Ubiquitin OS=Homo sapiens GN=UBB PE=2 SV=1	B4DV12,F5GXK7,F5GYU3,F5GZ39,F5H041,F5H265,F5H2Z3,F5H388,F5H4D8,F5H6Q2,F5H747,F5H7K6,F5H7Y5,J3QKN0,J3QS39,J3QSA3,J3QTR3,P0CG47,P0CG48,P62979,P62987,Q96C32	Uniprot_human_V1.fasta	17215.6	0.999	2	2	2	0.000363	0.144
Cluster of Apolipoprotein E OS=Homo sapiens GN=APOE PE=1 SV=1 (P02649)	Apolipoprotein E OS=Homo sapiens GN=APOE PE=1 SV=1	P02649	Uniprot_human_V1.fasta	36153.5	1	10	11	11	0.002	0.278
Cluster of Elongation factor 1-gamma OS=Homo sapiens GN=EEF1G PE=2 SV=1 (B4DTG2)	Elongation factor 1-gamma OS=Homo sapiens GN=EEF1G PE=2 SV=1	B4DTG2,P26641	Uniprot_human_V1.fasta	56150.9	0.787	2	2	2	0.000363	0.0267
Cluster of Apolipoprotein A-I OS=Homo sapiens GN=APOA1 PE=1 SV=1 (P02647)	Apolipoprotein A-I OS=Homo sapiens GN=APOA1 PE=1 SV=1	P02647	Uniprot_human_V1.fasta	30778.5	1	13	13	16	0.0029	0.375
Cluster of Protein S (Alpha), isoform CRA_b OS=Homo sapiens GN=PROS1 PE=4 SV=1 (G5E9F8)	Protein S (Alpha), isoform CRA_b OS=Homo sapiens GN=PROS1 PE=4 SV=1	G5E9F8,P07225	Uniprot_human_V1.fasta	60357.3	1	2	2	2	0.000363	0.0349
Cluster of Myosin regulatory light chain 12A OS=Homo sapiens GN=MYL12A PE=4 SV=1 (J3QRS3)	Myosin regulatory light chain 12A OS=Homo sapiens GN=MYL12A PE=4 SV=1	J3QRS3,O14950,P19105	Uniprot_human_V1.fasta	20458.1	0.998	1	1	2	0.000363	0.113
Cluster of Transforming growth factor-beta-induced protein ig-h3 OS=Homo sapiens GN=TGFBI PE=4 SV=1 (G8JLA8)	Transforming growth factor-beta-induced protein ig-h3 OS=Homo sapiens GN=TGFBI PE=4 SV=1	G8JLA8,Q15582	Uniprot_human_V1.fasta	74695.8	1	6	6	6	0.00109	0.111
Cluster of Protein S100-A8 OS=Homo sapiens GN=S100A8 PE=1 SV=1 (P05109)	Protein S100-A8 OS=Homo sapiens GN=S100A8 PE=1 SV=1	P05109	Uniprot_human_V1.fasta	10835	1	2	2	2	0.000363	0.204
Cluster of Collagen alpha-1(XVIII) chain (Fragment) OS=Homo sapiens GN=COL18A1 PE=4 SV=1 (H7BXV5)	Collagen alpha-1(XVIII) chain (Fragment) OS=Homo sapiens GN=COL18A1 PE=4 SV=1	H7BXV5,P39060,P39060-1,P39060-2	Uniprot_human_V1.fasta	70734.9	1	5	5	5	0.000908	0.0771
Cluster of Asporin OS=Homo sapiens GN=ASPN PE=1 SV=2 (Q9BXN1)	Asporin OS=Homo sapiens GN=ASPN PE=1 SV=2	Q9BXN1	Uniprot_human_V1.fasta	43419.8	0.999	2	2	2	0.000363	0.0553
Cluster of Hemoglobin subunit beta OS=Homo sapiens GN=HBB PE=1 SV=2 (P68871)	Hemoglobin subunit beta OS=Homo sapiens GN=HBB PE=1 SV=2	P68871	Uniprot_human_V1.fasta	15998	1	5	5	5	0.000908	0.381
Cluster of Keratin, type II cytoskeletal 2 epidermal OS=Homo sapiens GN=KRT2 PE=1 SV=2 (P35908)	Keratin, type II cytoskeletal 1b OS=Homo sapiens GN=KRT77 PE=1 SV=3	Q7Z794	Uniprot_human_V1.fasta	61901.9	0.991	1	1	8	0.00145	0.0675
Cluster of Collagen alpha-3(VI) chain OS=Homo sapiens GN=COL6A3 PE=4 SV=1 (E7ENL6)	Collagen alpha-3(VI) chain OS=Homo sapiens GN=COL6A3 PE=4 SV=1	E7ENL6,E9PCV6,E9PFQ6,P12111,P12111-2	Uniprot_human_V1.fasta	322186	1	36	37	40	0.00726	0.136
Cluster of Peroxiredoxin-1 OS=Homo sapiens GN=PRDX1 PE=1 SV=1 (Q06830)	Peroxiredoxin-1 OS=Homo sapiens GN=PRDX1 PE=1 SV=1	Q06830	Uniprot_human_V1.fasta	22110.9	1	2	2	2	0.000363	0.101
Cluster of EGF-containing fibulin-like extracellular matrix protein 1 OS=Homo sapiens GN=EFEMP1 PE=1 SV=2 (Q12805)	EGF-containing fibulin-like extracellular matrix protein 1 OS=Homo sapiens GN=EFEMP1 PE=1 SV=2	Q12805,Q12805-2,Q12805-3,Q12805-4	Uniprot_human_V1.fasta	54639.1	1	3	3	3	0.000545	0.0649
Cluster of Glia-derived nexin OS=Homo sapiens GN=SERPINE2 PE=1 SV=1 (P07093)	Glia-derived nexin OS=Homo sapiens GN=SERPINE2 PE=1 SV=1	P07093,P07093-2,P07093-3	Uniprot_human_V1.fasta	44003.2	1	2	2	2	0.000363	0.0477
Cluster of L-lactate dehydrogenase OS=Homo sapiens GN=LDHA PE=3 SV=1 (F5H308)	L-lactate dehydrogenase OS=Homo sapiens GN=LDHA PE=3 SV=1	F5H308,P00338,P00338-3	Uniprot_human_V1.fasta	33656.7	1	3	3	3	0.000545	0.102
Cluster of Collagen alpha-1(XII) chain OS=Homo sapiens GN=COL12A1 PE=4 SV=1 (D6RGG3)	Collagen alpha-1(XII) chain OS=Homo sapiens GN=COL12A1 PE=4 SV=1	D6RGG3,Q99715,Q99715-4	Uniprot_human_V1.fasta	333200	1	17	17	17	0.00309	0.0666
Cluster of Protein-glutamine gamma-glutamyltransferase 2 OS=Homo sapiens GN=TGM2 PE=2 SV=1 (B4DIT7)	Protein-glutamine gamma-glutamyltransferase 2 OS=Homo sapiens GN=TGM2 PE=2 SV=1	B4DIT7,F5H6P0,P21980	Uniprot_human_V1.fasta	68649.2	1	5	5	5	0.000908	0.099
Cluster of Basement membrane-specific heparan sulfate proteoglycan core protein OS=Homo sapiens GN=HSPG2 PE=1 SV=4 (P98160)	Basement membrane-specific heparan sulfate proteoglycan core protein OS=Homo sapiens GN=HSPG2 PE=1 SV=4	P98160	Uniprot_human_V1.fasta	468811	1	8	8	8	0.00145	0.0237
Cluster of Clusterin OS=Homo sapiens GN=CLU PE=1 SV=1 (P10909)	Clusterin OS=Homo sapiens GN=CLU PE=1 SV=1	P10909,P10909-2,P10909-4,P10909-5	Uniprot_human_V1.fasta	52495	1	8	8	10	0.00182	0.207
Cluster of Membrane primary amine oxidase OS=Homo sapiens GN=AOC3 PE=1 SV=3 (Q16853)	Membrane primary amine oxidase OS=Homo sapiens GN=AOC3 PE=1 SV=3	Q16853	Uniprot_human_V1.fasta	84622.1	0.862	2	2	2	0.000363	0.017
Cluster of EGF-like repeat and discoidin I-like domain-containing protein 3 OS=Homo sapiens GN=EDIL3 PE=1 SV=1 (O43854)	EGF-like repeat and discoidin I-like domain-containing protein 3 OS=Homo sapiens GN=EDIL3 PE=1 SV=1	O43854,O43854-2	Uniprot_human_V1.fasta	53765	0.997	2	2	2	0.000363	0.0354
Cluster of Decorin OS=Homo sapiens GN=DCN PE=1 SV=1 (P07585)	Decorin OS=Homo sapiens GN=DCN PE=1 SV=1	P07585	Uniprot_human_V1.fasta	39748.2	1	6	6	6	0.00109	0.167
Cluster of Keratin, type II cytoskeletal 2 epidermal OS=Homo sapiens GN=KRT2 PE=1 SV=2 (P35908)	Keratin, type II cytoskeletal 2 epidermal OS=Homo sapiens GN=KRT2 PE=1 SV=2	P35908	Uniprot_human_V1.fasta	65433.9	1	22	22	43	0.00781	0.482
Cluster of Ig mu chain C region OS=Homo sapiens GN=IGHM PE=1 SV=3 (P01871)	Ig mu chain C region OS=Homo sapiens GN=IGHM PE=1 SV=3	P01871,P01871-2	Uniprot_human_V1.fasta	49305.7	1	7	7	7	0.00127	0.188
Cluster of Myosin regulatory light polypeptide 9 OS=Homo sapiens GN=MYL9 PE=1 SV=4 (P24844)	Myosin regulatory light polypeptide 9 OS=Homo sapiens GN=MYL9 PE=1 SV=4	P24844,P24844-2	Uniprot_human_V1.fasta	19828.1	1	2	2	3	0.000545	0.18
Cluster of Ig lambda-2 chain C regions OS=Homo sapiens GN=IGLC2 PE=1 SV=1 (P0CG05)	Ig lambda-2 chain C regions OS=Homo sapiens GN=IGLC2 PE=1 SV=1	P0CG05,P0CG06	Uniprot_human_V1.fasta	11293.2	1	2	3	9	0.00163	0.557
Cluster of Tetranectin OS=Homo sapiens GN=CLEC3B PE=4 SV=1 (E9PHK0)	Tetranectin OS=Homo sapiens GN=CLEC3B PE=4 SV=1	E9PHK0,P05452	Uniprot_human_V1.fasta	17794.2	0.999	2	2	2	0.000363	0.144
Cluster of Keratin, type I cytoskeletal 14 OS=Homo sapiens GN=KRT14 PE=1 SV=4 (P02533)	Keratin, type I cytoskeletal 14 OS=Homo sapiens GN=KRT14 PE=1 SV=4	P02533	Uniprot_human_V1.fasta	51562.5	1	3	3	10	0.00182	0.193
Cluster of Tubulointerstitial nephritis antigen-like OS=Homo sapiens GN=TINAGL1 PE=1 SV=1 (Q9GZM7)	Tubulointerstitial nephritis antigen-like OS=Homo sapiens GN=TINAGL1 PE=1 SV=1	Q9GZM7,Q9GZM7-3	Uniprot_human_V1.fasta	52387	1	2	2	2	0.000363	0.0493
Cluster of Nidogen-1 OS=Homo sapiens GN=NID1 PE=1 SV=3 (P14543)	Nidogen-1 OS=Homo sapiens GN=NID1 PE=1 SV=3	P14543,P14543-2	Uniprot_human_V1.fasta	136376	1	4	4	4	0.000726	0.0345
Cluster of Histone H2B type 1-J OS=Homo sapiens GN=HIST1H2BJ PE=1 SV=3 (P06899)	Histone H2B type 1-J OS=Homo sapiens GN=HIST1H2BJ PE=1 SV=3	P06899,P23527,Q16778	Uniprot_human_V1.fasta	13904.7	0.999	1	1	4	0.000726	0.23
Cluster of Carboxypeptidase B2 OS=Homo sapiens GN=CPB2 PE=1 SV=2 (Q96IY4)	Carboxypeptidase B2 OS=Homo sapiens GN=CPB2 PE=1 SV=2	Q96IY4	Uniprot_human_V1.fasta	48424.7	1	4	4	4	0.000726	0.0946
Cluster of Tropomyosin 1 (Alpha), isoform CRA_f OS=Homo sapiens GN=TPM1 PE=2 SV=1 (Q6ZN40)	Tropomyosin beta chain OS=Homo sapiens GN=TPM2 PE=1 SV=1	P07951,P07951-2,Q5TCU3,Q5TCU8	Uniprot_human_V1.fasta	32851.7	0.999	1	1	3	0.000545	0.123
Cluster of 60S ribosomal protein L18 (Fragment) OS=Homo sapiens GN=RPL18 PE=4 SV=1 (F8VUA6)	60S ribosomal protein L18 (Fragment) OS=Homo sapiens GN=RPL18 PE=4 SV=1	F8VUA6,F8VWC5,F8VYV2,G3V203,H0YHA7,J3QQ67,Q07020	Uniprot_human_V1.fasta	14529.4	1	2	2	2	0.000363	0.177
Cluster of Vimentin OS=Homo sapiens GN=VIM PE=1 SV=4 (P08670)	Desmin OS=Homo sapiens GN=DES PE=1 SV=3	P17661	Uniprot_human_V1.fasta	53536.6	1	8	8	15	0.00272	0.27
Cluster of Tropomyosin 1 (Alpha), isoform CRA_f OS=Homo sapiens GN=TPM1 PE=2 SV=1 (Q6ZN40)	Tropomyosin 1 (Alpha), isoform CRA_f OS=Homo sapiens GN=TPM1 PE=2 SV=1	Q6ZN40	Uniprot_human_V1.fasta	37454.3	0.999	2	2	4	0.000726	0.144
Cluster of Thrombospondin-1 OS=Homo sapiens GN=THBS1 PE=1 SV=2 (P07996)	Thrombospondin-1 OS=Homo sapiens GN=THBS1 PE=1 SV=2	P07996	Uniprot_human_V1.fasta	129382	1	4	4	4	0.000726	0.035
Cluster of Collagen alpha-1(XV) chain OS=Homo sapiens GN=COL15A1 PE=1 SV=2 (P39059)	Collagen alpha-1(XV) chain OS=Homo sapiens GN=COL15A1 PE=1 SV=2	P39059	Uniprot_human_V1.fasta	141722	0.995	2	2	2	0.000363	0.0137
Cluster of Histone H1.3 OS=Homo sapiens GN=HIST1H1D PE=1 SV=2 (P16402)	Histone H1.3 OS=Homo sapiens GN=HIST1H1D PE=1 SV=2	P16402	Uniprot_human_V1.fasta	22351.3	0.993	2	2	2	0.000363	0.0814
Cluster of Annexin A1 OS=Homo sapiens GN=ANXA1 PE=1 SV=2 (P04083)	Annexin A1 OS=Homo sapiens GN=ANXA1 PE=1 SV=2	P04083	Uniprot_human_V1.fasta	38715.9	1	3	3	3	0.000545	0.139
Cluster of Prelamin-A/C OS=Homo sapiens GN=LMNA PE=3 SV=1 (D6RAQ3)	Prelamin-A/C OS=Homo sapiens GN=LMNA PE=3 SV=1	D6RAQ3,E7EUI9,P02545,P02545-2,Q5TCI8,Q6UYC3	Uniprot_human_V1.fasta	55763.5	1	3	3	3	0.000545	0.0602
Cluster of Lysosome-associated membrane glycoprotein 1 OS=Homo sapiens GN=LAMP1 PE=1 SV=3 (P11279)	Lysosome-associated membrane glycoprotein 1 OS=Homo sapiens GN=LAMP1 PE=1 SV=3	P11279	Uniprot_human_V1.fasta	44883.1	1	2	2	2	0.000363	0.048
Cluster of Myosin light polypeptide 6 OS=Homo sapiens GN=MYL6 PE=2 SV=1 (B7Z6Z4)	Myosin light polypeptide 6 OS=Homo sapiens GN=MYL6 PE=2 SV=1	B7Z6Z4,F8W1R7,G3V1V0,G8JLA2,J3KND3,P60660,P60660-2	Uniprot_human_V1.fasta	26706.4	1	5	5	5	0.000908	0.227
Cluster of Lactadherin OS=Homo sapiens GN=MFGE8 PE=4 SV=1 (F5GZN3)	Lactadherin OS=Homo sapiens GN=MFGE8 PE=4 SV=1	F5GZN3,F5H7N9,Q08431,Q08431-2	Uniprot_human_V1.fasta	38343.8	1	3	3	3	0.000545	0.0875
Cluster of Dermcidin OS=Homo sapiens GN=DCD PE=1 SV=2 (P81605)	Dermcidin OS=Homo sapiens GN=DCD PE=1 SV=2	P81605,P81605-2	Uniprot_human_V1.fasta	11284.1	0.995	2	2	2	0.000363	0.127
Cluster of Apolipoprotein A-IV OS=Homo sapiens GN=APOA4 PE=1 SV=3 (P06727)	Apolipoprotein A-IV OS=Homo sapiens GN=APOA4 PE=1 SV=3	P06727	Uniprot_human_V1.fasta	45399.4	1	17	18	18	0.00327	0.417
Cluster of Fructose-bisphosphate aldolase A (Fragment) OS=Homo sapiens GN=ALDOA PE=4 SV=1 (H3BPS8)	Fructose-bisphosphate aldolase A (Fragment) OS=Homo sapiens GN=ALDOA PE=4 SV=1	H3BPS8,H3BQN4,H3BUH7,J3KPS3,P04075	Uniprot_human_V1.fasta	30427.1	1	3	3	3	0.000545	0.101
Cluster of Collagen alpha-1(I) chain OS=Homo sapiens GN=COL1A1 PE=1 SV=5 (P02452)	Collagen alpha-1(I) chain OS=Homo sapiens GN=COL1A1 PE=1 SV=5	P02452	Uniprot_human_V1.fasta	138941	1	2	2	2	0.000363	0.0143
Cluster of Tubulin alpha-4A chain OS=Homo sapiens GN=TUBA4A PE=2 SV=1 (A8MUB1)	Tubulin alpha-4A chain OS=Homo sapiens GN=TUBA4A PE=2 SV=1	A8MUB1,P68366	Uniprot_human_V1.fasta	48329	1	4	4	4	0.000726	0.127
Cluster of Gelsolin OS=Homo sapiens GN=GSN PE=4 SV=1 (F5H1A8)	Gelsolin OS=Homo sapiens GN=GSN PE=4 SV=1	F5H1A8,P06396,P06396-2,P06396-3	Uniprot_human_V1.fasta	81484.9	1	3	3	3	0.000545	0.0433
Cluster of Histone H2A type 1 OS=Homo sapiens GN=HIST1H2AG PE=1 SV=2 (P0C0S8)	Histone H2A type 1 OS=Homo sapiens GN=HIST1H2AG PE=1 SV=2	P0C0S8,P20671,Q16777,Q6FI13,Q96KK5,Q99878,Q9BTM1,Q9BTM1-2	Uniprot_human_V1.fasta	14092.1	1	2	2	4	0.000726	0.123
Cluster of Immunoglobulin J chain (Fragment) OS=Homo sapiens GN=IGJ PE=4 SV=1 (C9JA05)	Immunoglobulin J chain (Fragment) OS=Homo sapiens GN=IGJ PE=4 SV=1	C9JA05,D6RD17,D6RHJ6,P01591	Uniprot_human_V1.fasta	8167.6	1	2	2	2	0.000363	0.286
Cluster of Keratin, type I cytoskeletal 14 OS=Homo sapiens GN=KRT14 PE=1 SV=4 (P02533)	Keratin, type I cytoskeletal 16 OS=Homo sapiens GN=KRT16 PE=1 SV=4	P08779	Uniprot_human_V1.fasta	51269	0.997	1	1	8	0.00145	0.161
Cluster of Collagen alpha-2(VI) chain OS=Homo sapiens GN=COL6A2 PE=1 SV=4 (P12110)	Collagen alpha-2(VI) chain OS=Homo sapiens GN=COL6A2 PE=1 SV=4	P12110	Uniprot_human_V1.fasta	108581	1	9	9	9	0.00163	0.0815
Cluster of Hemoglobin subunit alpha OS=Homo sapiens GN=HBA1 PE=1 SV=2 (P69905)	Hemoglobin subunit alpha OS=Homo sapiens GN=HBA1 PE=1 SV=2	P69905	Uniprot_human_V1.fasta	15257.6	1	3	3	3	0.000545	0.218
Cluster of Transgelin OS=Homo sapiens GN=TAGLN PE=1 SV=4 (Q01995)	Transgelin OS=Homo sapiens GN=TAGLN PE=1 SV=4	Q01995	Uniprot_human_V1.fasta	22611	1	9	9	9	0.00163	0.493
Cluster of Cartilage intermediate layer protein 1 OS=Homo sapiens GN=CILP PE=1 SV=4 (O75339)	Cartilage intermediate layer protein 1 OS=Homo sapiens GN=CILP PE=1 SV=4	O75339	Uniprot_human_V1.fasta	132565	1	3	3	3	0.000545	0.0253
Cluster of Collagen alpha-1(VI) chain OS=Homo sapiens GN=COL6A1 PE=1 SV=3 (P12109)	Collagen alpha-1(VI) chain OS=Homo sapiens GN=COL6A1 PE=1 SV=3	P12109	Uniprot_human_V1.fasta	108531	1	11	11	16	0.0029	0.116
Cluster of Protein S100-A9 OS=Homo sapiens GN=S100A9 PE=1 SV=1 (P06702)	Protein S100-A9 OS=Homo sapiens GN=S100A9 PE=1 SV=1	P06702	Uniprot_human_V1.fasta	13242.3	1	2	2	2	0.000363	0.184
Cluster of Collagen alpha-1(XIV) chain OS=Homo sapiens GN=COL14A1 PE=1 SV=3 (Q05707)	Collagen alpha-1(XIV) chain OS=Homo sapiens GN=COL14A1 PE=1 SV=3	Q05707,Q05707-2	Uniprot_human_V1.fasta	193516	1	9	9	9	0.00163	0.0523
Cluster of Complement component C9 OS=Homo sapiens GN=C9 PE=1 SV=2 (P02748)	Complement component C9 OS=Homo sapiens GN=C9 PE=1 SV=2	P02748	Uniprot_human_V1.fasta	63174.9	0.999	2	2	2	0.000363	0.0304
Cluster of Filamin-A OS=Homo sapiens GN=FLNA PE=1 SV=4 (P21333)	Filamin-A OS=Homo sapiens GN=FLNA PE=1 SV=4	P21333,P21333-2,Q5HY54	Uniprot_human_V1.fasta	280729	1	12	12	12	0.00218	0.0627
Cluster of Elongation factor 1-delta (Fragment) OS=Homo sapiens GN=EEF1D PE=3 SV=1 (E9PK01)	Elongation factor 1-delta (Fragment) OS=Homo sapiens GN=EEF1D PE=3 SV=1	E9PK01,E9PRY8,P29692,P29692-2,P29692-3	Uniprot_human_V1.fasta	28821.4	0.941	2	2	2	0.000363	0.0805
Cluster of Inter-alpha-trypsin inhibitor heavy chain H2 OS=Homo sapiens GN=ITIH2 PE=1 SV=2 (P19823)	Inter-alpha-trypsin inhibitor heavy chain H2 OS=Homo sapiens GN=ITIH2 PE=1 SV=2	P19823,Q5T985	Uniprot_human_V1.fasta	106466	1	3	3	3	0.000545	0.0359
Cluster of Keratin, type II cytoskeletal 2 epidermal OS=Homo sapiens GN=KRT2 PE=1 SV=2 (P35908)	Keratin, type II cytoskeletal 73 OS=Homo sapiens GN=KRT73 PE=1 SV=1	Q86Y46,Q86Y46-2	Uniprot_human_V1.fasta	58925.1	0.862	0	0	4	0.000726	0.0352
Cluster of Annexin OS=Homo sapiens GN=ANXA5 PE=3 SV=1 (E7ENQ5)	Annexin OS=Homo sapiens GN=ANXA5 PE=3 SV=1	E7ENQ5,E9PHT9,P08758	Uniprot_human_V1.fasta	30864.3	0.998	2	2	2	0.000363	0.0761
Cluster of Histone H3 OS=Homo sapiens GN=HIST2H3PS2 PE=3 SV=1 (Q5TEC6)	Histone H3 OS=Homo sapiens GN=HIST2H3PS2 PE=3 SV=1	Q5TEC6	Uniprot_human_V1.fasta	15430.7	0.978	3	3	3	0.000545	0.199
Cluster of Lactoferroxin-B (Fragment) OS=Homo sapiens GN=LTF PE=4 SV=1 (E7EQB2)	Lactoferroxin-B (Fragment) OS=Homo sapiens GN=LTF PE=4 SV=1	E7EQB2,E7ER44,P02788,P02788-2	Uniprot_human_V1.fasta	76626	1	2	2	2	0.000363	0.0402
Cluster of Complement factor H-related 1 OS=Homo sapiens GN=CFHR1 PE=4 SV=1 (B1AKG0)	Complement factor H-related 1 OS=Homo sapiens GN=CFHR1 PE=4 SV=1	B1AKG0,Q03591	Uniprot_human_V1.fasta	30858.1	1	3	3	5	0.000908	0.21
Cluster of Laminin subunit beta-2 OS=Homo sapiens GN=LAMB2 PE=1 SV=2 (P55268)	Laminin subunit beta-2 OS=Homo sapiens GN=LAMB2 PE=1 SV=2	P55268	Uniprot_human_V1.fasta	195976	1	4	4	4	0.000726	0.0267
Cluster of Fibrinogen alpha chain OS=Homo sapiens GN=FGA PE=1 SV=2 (P02671)	Fibrinogen alpha chain OS=Homo sapiens GN=FGA PE=1 SV=2	P02671,P02671-2	Uniprot_human_V1.fasta	94973.4	1	4	4	4	0.000726	0.0554
Cluster of Fibronectin OS=Homo sapiens GN=FN1 PE=4 SV=1 (E9PE77)	Fibronectin OS=Homo sapiens GN=FN1 PE=4 SV=1	E9PE77,F8W7G7,P02751,P02751-11,P02751-15,P02751-3,P02751-5,P02751-7	Uniprot_human_V1.fasta	256494	1	5	5	5	0.000908	0.027
Cluster of Actin, aortic smooth muscle OS=Homo sapiens GN=ACTA2 PE=1 SV=1 (P62736)	Actin, aortic smooth muscle OS=Homo sapiens GN=ACTA2 PE=1 SV=1	P62736,P68032	Uniprot_human_V1.fasta	42010.1	1	6	7	18	0.00327	0.438
Cluster of Neutrophil defensin 1 OS=Homo sapiens GN=DEFA1 PE=1 SV=1 (P59665)	Neutrophil defensin 1 OS=Homo sapiens GN=DEFA1 PE=1 SV=1	P59665,P59666	Uniprot_human_V1.fasta	10201	1	2	2	2	0.000363	0.191
Cluster of Tenascin OS=Homo sapiens GN=TNC PE=1 SV=3 (P24821)	Tenascin OS=Homo sapiens GN=TNC PE=1 SV=3	P24821,P24821-4	Uniprot_human_V1.fasta	240850	1	24	24	24	0.00436	0.133
Cluster of Neutrophil elastase OS=Homo sapiens GN=ELANE PE=1 SV=1 (P08246)	Neutrophil elastase OS=Homo sapiens GN=ELANE PE=1 SV=1	P08246	Uniprot_human_V1.fasta	28517.4	1	3	3	3	0.000545	0.0712
Cluster of Plasminogen OS=Homo sapiens GN=PLG PE=1 SV=2 (P00747)	Plasminogen OS=Homo sapiens GN=PLG PE=1 SV=2	P00747	Uniprot_human_V1.fasta	90567.4	1	4	4	5	0.000908	0.0741
Cluster of ATP synthase subunit beta OS=Homo sapiens GN=ATP5B PE=3 SV=1 (F8VPV9)	ATP synthase subunit beta OS=Homo sapiens GN=ATP5B PE=3 SV=1	F8VPV9,H0YH81,P06576	Uniprot_human_V1.fasta	55309.1	1	2	2	2	0.000363	0.0541
Cluster of Spondin-1 OS=Homo sapiens GN=SPON1 PE=1 SV=2 (Q9HCB6)	Spondin-1 OS=Homo sapiens GN=SPON1 PE=1 SV=2	Q9HCB6	Uniprot_human_V1.fasta	90973.6	0.986	2	2	2	0.000363	0.0248
Cluster of Haptoglobin beta chain (Fragment) OS=Homo sapiens GN=HP PE=3 SV=1 (J3QLC9)	Haptoglobin beta chain (Fragment) OS=Homo sapiens GN=HP PE=3 SV=1	J3QLC9,P00738	Uniprot_human_V1.fasta	40779.7	1	5	5	5	0.000908	0.137
Cluster of Pigment epithelium-derived factor OS=Homo sapiens GN=SERPINF1 PE=3 SV=1 (I3L3M1)	Pigment epithelium-derived factor OS=Homo sapiens GN=SERPINF1 PE=3 SV=1	I3L3M1,P36955	Uniprot_human_V1.fasta	25979.5	1	3	3	3	0.000545	0.134
Cluster of Vinculin OS=Homo sapiens GN=VCL PE=1 SV=4 (P18206)	Vinculin OS=Homo sapiens GN=VCL PE=1 SV=4	P18206,P18206-2,Q5JQ13	Uniprot_human_V1.fasta	123801	1	3	3	3	0.000545	0.0291
Cluster of Ferritin heavy chain OS=Homo sapiens GN=FTH1 PE=1 SV=2 (P02794)	Ferritin heavy chain OS=Homo sapiens GN=FTH1 PE=1 SV=2	P02794	Uniprot_human_V1.fasta	21226.2	1	4	4	4	0.000726	0.224
Cluster of Vimentin OS=Homo sapiens GN=VIM PE=1 SV=4 (P08670)	Vimentin OS=Homo sapiens GN=VIM PE=1 SV=4	P08670	Uniprot_human_V1.fasta	53652.7	1	12	12	17	0.00309	0.358
Cluster of Pyruvate kinase (Fragment) OS=Homo sapiens GN=PKM PE=3 SV=1 (H3BTN5)	Pyruvate kinase (Fragment) OS=Homo sapiens GN=PKM PE=3 SV=1	H3BTN5,P14618,P14618-2	Uniprot_human_V1.fasta	53045.9	0.998	2	2	3	0.000545	0.0454
Cluster of Dihydropyrimidinase-related protein 3 OS=Homo sapiens GN=DPYSL3 PE=1 SV=1 (Q14195)	Dihydropyrimidinase-related protein 3 OS=Homo sapiens GN=DPYSL3 PE=1 SV=1	Q14195,Q14195-2	Uniprot_human_V1.fasta	61964.1	1	3	3	3	0.000545	0.0491
Cluster of Vitronectin OS=Homo sapiens GN=VTN PE=1 SV=1 (P04004)	Vitronectin OS=Homo sapiens GN=VTN PE=1 SV=1	P04004	Uniprot_human_V1.fasta	54306.1	1	10	12	18	0.00327	0.195
Cluster of C4b-binding protein alpha chain OS=Homo sapiens GN=C4BPA PE=1 SV=2 (P04003)	C4b-binding protein alpha chain OS=Homo sapiens GN=C4BPA PE=1 SV=2	P04003	Uniprot_human_V1.fasta	67033	1	8	8	8	0.00145	0.171
Cluster of Alpha-actinin-1 (Fragment) OS=Homo sapiens GN=ACTN1 PE=4 SV=1 (H0YJW3)	Alpha-actinin-1 (Fragment) OS=Homo sapiens GN=ACTN1 PE=4 SV=1	H0YJW3	Uniprot_human_V1.fasta	28874	1	2	3	3	0.000545	0.0956

## Sheet: training-5
Cluster	Protein name	Protein accession numbers	Database sources	Protein molecular weight (Da)	Protein identification probability	Exclusive unique peptide count	Exclusive unique spectrum count	Total spectrum count	Percentage of total spectra	Percentage sequence coverage
Cluster of Triosephosphate isomerase OS=Homo sapiens GN=TPI1 PE=1 SV=3 (P60174)	Triosephosphate isomerase OS=Homo sapiens GN=TPI1 PE=1 SV=3	P60174,P60174-1	Uniprot_human_V1.fasta	30790.8	1	4	4	5	0.00069	0.217
Cluster of ATP synthase subunit beta OS=Homo sapiens GN=ATP5B PE=3 SV=1 (F8VPV9)	ATP synthase subunit beta OS=Homo sapiens GN=ATP5B PE=3 SV=1	F8VPV9,P06576	Uniprot_human_V1.fasta	55309.1	1	8	8	8	0.0011	0.237
Cluster of Clusterin OS=Homo sapiens GN=CLU PE=3 SV=1 (E7ETA7)	Clusterin OS=Homo sapiens GN=CLU PE=3 SV=1	E7ETA7,P10909,P10909-2,P10909-3,P10909-4,P10909-5	Uniprot_human_V1.fasta	37197.2	1	2	2	3	0.000414	0.105
Cluster of Alcohol dehydrogenase 1B OS=Homo sapiens GN=ADH1B PE=1 SV=2 (P00325)	Alcohol dehydrogenase 1B OS=Homo sapiens GN=ADH1B PE=1 SV=2	P00325	Uniprot_human_V1.fasta	39854.3	1	6	7	8	0.0011	0.181
Cluster of Cathepsin G OS=Homo sapiens GN=CTSG PE=1 SV=2 (P08311)	Cathepsin G OS=Homo sapiens GN=CTSG PE=1 SV=2	P08311	Uniprot_human_V1.fasta	28837.5	1	5	5	5	0.00069	0.22
Cluster of Fibrinogen beta chain OS=Homo sapiens GN=FGB PE=1 SV=2 (P02675)	Fibrinogen beta chain OS=Homo sapiens GN=FGB PE=1 SV=2	P02675	Uniprot_human_V1.fasta	55928.6	1	12	12	12	0.00166	0.287
Cluster of Biglycan OS=Homo sapiens GN=BGN PE=2 SV=1 (A6NLG9)	Biglycan OS=Homo sapiens GN=BGN PE=2 SV=1	A6NLG9,P21810	Uniprot_human_V1.fasta	34877.2	1	4	4	5	0.00069	0.16
Cluster of ATP synthase subunit alpha, mitochondrial OS=Homo sapiens GN=ATP5A1 PE=1 SV=1 (P25705)	ATP synthase subunit alpha, mitochondrial OS=Homo sapiens GN=ATP5A1 PE=1 SV=1	P25705	Uniprot_human_V1.fasta	59752.1	1	11	11	11	0.00152	0.231
Cluster of Prolargin OS=Homo sapiens GN=PRELP PE=1 SV=1 (P51888)	Prolargin OS=Homo sapiens GN=PRELP PE=1 SV=1	P51888	Uniprot_human_V1.fasta	43812.4	1	4	4	5	0.00069	0.139
Cluster of Lumican OS=Homo sapiens GN=LUM PE=1 SV=2 (P51884)	Lumican OS=Homo sapiens GN=LUM PE=1 SV=2	P51884	Uniprot_human_V1.fasta	38431.5	1	7	7	7	0.000966	0.201
Cluster of Cytochrome c (Fragment) OS=Homo sapiens GN=CYCS PE=3 SV=1 (C9JFR7)	Cytochrome c (Fragment) OS=Homo sapiens GN=CYCS PE=3 SV=1	C9JFR7,P99999	Uniprot_human_V1.fasta	11334	0.996	2	2	2	0.000276	0.178
Cluster of 60S ribosomal protein L35a OS=Homo sapiens GN=RPL35A PE=1 SV=2 (P18077)	60S ribosomal protein L35a OS=Homo sapiens GN=RPL35A PE=1 SV=2	P18077	Uniprot_human_V1.fasta	12538.1	0.998	2	2	2	0.000276	0.0727
Cluster of Neutrophil defensin 1 OS=Homo sapiens GN=DEFA1 PE=1 SV=1 (P59665)	Neutrophil defensin 1 OS=Homo sapiens GN=DEFA1 PE=1 SV=1	P59665,P59666	Uniprot_human_V1.fasta	10201	1	2	2	2	0.000276	0.191
Cluster of Nucleolin OS=Homo sapiens GN=NCL PE=1 SV=3 (P19338)	Nucleolin OS=Homo sapiens GN=NCL PE=1 SV=3	P19338	Uniprot_human_V1.fasta	76615.9	1	4	4	4	0.000552	0.0507
Cluster of Heterogeneous nuclear ribonucleoprotein M OS=Homo sapiens GN=HNRNPM PE=1 SV=3 (P52272)	Heterogeneous nuclear ribonucleoprotein M OS=Homo sapiens GN=HNRNPM PE=1 SV=3	P52272,P52272-2	Uniprot_human_V1.fasta	77517.3	1	2	2	2	0.000276	0.0521
Cluster of Chymase OS=Homo sapiens GN=CMA1 PE=1 SV=1 (P23946)	Chymase OS=Homo sapiens GN=CMA1 PE=1 SV=1	P23946	Uniprot_human_V1.fasta	27325.5	1	4	4	4	0.000552	0.206
Cluster of Glyceraldehyde-3-phosphate dehydrogenase OS=Homo sapiens GN=GAPDH PE=3 SV=1 (E7EUT4)	Glyceraldehyde-3-phosphate dehydrogenase OS=Homo sapiens GN=GAPDH PE=3 SV=1	E7EUT4,P04406	Uniprot_human_V1.fasta	31548	1	7	7	9	0.00124	0.28
Cluster of Laminin subunit gamma-1 OS=Homo sapiens GN=LAMC1 PE=1 SV=3 (P11047)	Laminin subunit gamma-1 OS=Homo sapiens GN=LAMC1 PE=1 SV=3	P11047	Uniprot_human_V1.fasta	177601	0.998	3	3	3	0.000414	0.0211
Cluster of Olfactomedin-like protein 1 OS=Homo sapiens GN=OLFML1 PE=1 SV=2 (Q6UWY5)	Olfactomedin-like protein 1 OS=Homo sapiens GN=OLFML1 PE=1 SV=2	Q6UWY5	Uniprot_human_V1.fasta	45952.1	0.998	3	3	3	0.000414	0.0647
Cluster of Hemoglobin subunit alpha OS=Homo sapiens GN=HBA1 PE=1 SV=2 (P69905)	Hemoglobin subunit alpha OS=Homo sapiens GN=HBA1 PE=1 SV=2	P69905	Uniprot_human_V1.fasta	15257.6	1	9	14	21	0.0029	0.669
Cluster of Desmoplakin OS=Homo sapiens GN=DSP PE=1 SV=3 (P15924)	Desmoplakin OS=Homo sapiens GN=DSP PE=1 SV=3	P15924	Uniprot_human_V1.fasta	331781	1	9	9	10	0.00138	0.0352
Cluster of Stress-induced-phosphoprotein 1 OS=Homo sapiens GN=STIP1 PE=4 SV=1 (F5H0T1)	Stress-induced-phosphoprotein 1 OS=Homo sapiens GN=STIP1 PE=4 SV=1	F5H0T1,G3XAD8,P31948	Uniprot_human_V1.fasta	59780.8	0.985	2	2	2	0.000276	0.0443
Cluster of Histone H3 OS=Homo sapiens GN=H3F3A PE=2 SV=1 (B4DEB1)	Histone H3 OS=Homo sapiens GN=H3F3A PE=2 SV=1	B4DEB1,P68431,P84243,Q16695,Q71DI3	Uniprot_human_V1.fasta	14052.9	1	1	1	3	0.000414	0.22
Cluster of Truncated apolipoprotein A-I OS=Homo sapiens GN=APOA1 PE=4 SV=1 (F8W696)	Truncated apolipoprotein A-I OS=Homo sapiens GN=APOA1 PE=4 SV=1	F8W696,P02647	Uniprot_human_V1.fasta	27909.5	1	5	5	5	0.00069	0.229
Cluster of Ig mu chain C region OS=Homo sapiens GN=IGHM PE=1 SV=3 (P01871)	Ig mu chain C region OS=Homo sapiens GN=IGHM PE=1 SV=3	P01871,P01871-2	Uniprot_human_V1.fasta	49305.7	0.979	3	3	3	0.000414	0.0686
Cluster of Actin, cytoplasmic 1 OS=Homo sapiens GN=ACTB PE=1 SV=1 (P60709)	Actin, cytoplasmic 1 OS=Homo sapiens GN=ACTB PE=1 SV=1	P60709,P63261	Uniprot_human_V1.fasta	41737.8	1	4	4	18	0.00249	0.336
Cluster of Ig heavy chain V-III region BRO OS=Homo sapiens PE=1 SV=1 (P01766)	Ig heavy chain V-III region BRO OS=Homo sapiens PE=1 SV=1	P01766	Uniprot_human_V1.fasta	13226.8	0.902	2	2	2	0.000276	0.25
Cluster of Laminin subunit alpha-5 OS=Homo sapiens GN=LAMA5 PE=1 SV=8 (O15230)	Laminin subunit alpha-5 OS=Homo sapiens GN=LAMA5 PE=1 SV=8	O15230	Uniprot_human_V1.fasta	399725	1	3	3	3	0.000414	0.00893
Cluster of Activated RNA polymerase II transcriptional coactivator p15 OS=Homo sapiens GN=SUB1 PE=1 SV=3 (P53999)	Activated RNA polymerase II transcriptional coactivator p15 OS=Homo sapiens GN=SUB1 PE=1 SV=3	P53999	Uniprot_human_V1.fasta	14395.9	0.999	3	3	3	0.000414	0.22
Cluster of Vimentin OS=Homo sapiens GN=VIM PE=1 SV=4 (P08670)	Vimentin OS=Homo sapiens GN=VIM PE=1 SV=4	P08670	Uniprot_human_V1.fasta	53652.7	1	25	27	33	0.00456	0.59
Cluster of Protein disulfide-isomerase A4 OS=Homo sapiens GN=PDIA4 PE=1 SV=2 (P13667)	Protein disulfide-isomerase A4 OS=Homo sapiens GN=PDIA4 PE=1 SV=2	P13667	Uniprot_human_V1.fasta	72934	1	8	8	8	0.0011	0.132
Cluster of 78 kDa glucose-regulated protein OS=Homo sapiens GN=HSPA5 PE=1 SV=2 (P11021)	78 kDa glucose-regulated protein OS=Homo sapiens GN=HSPA5 PE=1 SV=2	P11021	Uniprot_human_V1.fasta	72334.7	1	15	16	18	0.00249	0.327
Cluster of Plasma protease C1 inhibitor OS=Homo sapiens GN=SERPING1 PE=2 SV=1 (B4E1F0)	Plasma protease C1 inhibitor OS=Homo sapiens GN=SERPING1 PE=2 SV=1	B4E1F0,B4E1H2,E9PGN7,H9KV48,P05155	Uniprot_human_V1.fasta	55770.2	1	2	2	2	0.000276	0.0535
Cluster of Annexin (Fragment) OS=Homo sapiens GN=ANXA2 PE=3 SV=1 (H0YKL9)	Annexin (Fragment) OS=Homo sapiens GN=ANXA2 PE=3 SV=1	H0YKL9,H0YKS4,H0YKV8,H0YKX9,H0YKZ7,H0YLV6,H0YMD0,H0YMM1,H0YMT9,H0YMU9,H0YMW4,H0YN42,P07355,P07355-2	Uniprot_human_V1.fasta	25342.9	1	2	2	2	0.000276	0.227
Cluster of Fibrinogen alpha chain OS=Homo sapiens GN=FGA PE=1 SV=2 (P02671)	Fibrinogen alpha chain OS=Homo sapiens GN=FGA PE=1 SV=2	P02671,P02671-2	Uniprot_human_V1.fasta	94973.4	1	7	7	7	0.000966	0.11
Cluster of Tropomyosin alpha-3 chain OS=Homo sapiens GN=TPM3 PE=3 SV=1 (J3KN67)	Tropomyosin beta chain OS=Homo sapiens GN=TPM2 PE=1 SV=1	P07951,P07951-2,P07951-3,P67936,P67936-2,Q5TCU3,Q5TCU8	Uniprot_human_V1.fasta	32851.7	0.999	1	1	3	0.000414	0.0775
Cluster of Nidogen-1 OS=Homo sapiens GN=NID1 PE=1 SV=3 (P14543)	Nidogen-1 OS=Homo sapiens GN=NID1 PE=1 SV=3	P14543,P14543-2	Uniprot_human_V1.fasta	136376	1	4	4	4	0.000552	0.0417
Cluster of Ribosome-binding protein 1 OS=Homo sapiens GN=RRBP1 PE=4 SV=1 (F8W7S5)	Ribosome-binding protein 1 OS=Homo sapiens GN=RRBP1 PE=4 SV=1	F8W7S5,Q9P2E9,Q9P2E9-2,Q9P2E9-3	Uniprot_human_V1.fasta	152471	1	2	2	2	0.000276	0.0333
Cluster of von Willebrand factor OS=Homo sapiens GN=VWF PE=1 SV=4 (P04275)	von Willebrand factor OS=Homo sapiens GN=VWF PE=1 SV=4	P04275	Uniprot_human_V1.fasta	309251	0.976	4	4	4	0.000552	0.0153
Cluster of Membrane primary amine oxidase OS=Homo sapiens GN=AOC3 PE=1 SV=3 (Q16853)	Membrane primary amine oxidase OS=Homo sapiens GN=AOC3 PE=1 SV=3	Q16853	Uniprot_human_V1.fasta	84622.1	0.991	2	2	2	0.000276	0.0341
Cluster of Coagulation factor XIII A chain OS=Homo sapiens GN=F13A1 PE=1 SV=4 (P00488)	Coagulation factor XIII A chain OS=Homo sapiens GN=F13A1 PE=1 SV=4	P00488	Uniprot_human_V1.fasta	83267.3	1	2	2	2	0.000276	0.0383
Cluster of 60S ribosomal protein L12 OS=Homo sapiens GN=RPL12 PE=1 SV=1 (P30050)	60S ribosomal protein L12 OS=Homo sapiens GN=RPL12 PE=1 SV=1	P30050	Uniprot_human_V1.fasta	17819.1	1	2	2	2	0.000276	0.188
Cluster of 60S acidic ribosomal protein P0 (Fragment) OS=Homo sapiens GN=RPLP0 PE=3 SV=1 (F8VPE8)	60S acidic ribosomal protein P0 (Fragment) OS=Homo sapiens GN=RPLP0 PE=3 SV=1	F8VPE8,F8VU65,F8VW21,P05388,Q8NHW5	Uniprot_human_V1.fasta	16681.1	1	2	2	2	0.000276	0.163
Cluster of Keratin, type II cytoskeletal 2 epidermal OS=Homo sapiens GN=KRT2 PE=1 SV=2 (P35908)	Keratin, type II cytoskeletal 5 OS=Homo sapiens GN=KRT5 PE=1 SV=3	P13647	Uniprot_human_V1.fasta	62379.6	1	13	13	25	0.00345	0.344
Cluster of Keratin, type II cytoskeletal 1 OS=Homo sapiens GN=KRT1 PE=1 SV=6 (P04264)	Keratin, type II cytoskeletal 1 OS=Homo sapiens GN=KRT1 PE=1 SV=6	P04264	Uniprot_human_V1.fasta	66040.3	1	31	38	59	0.00815	0.57
Cluster of Keratin, type I cytoskeletal 10 OS=Homo sapiens GN=KRT10 PE=1 SV=6 (P13645)	Keratin, type I cytoskeletal 10 OS=Homo sapiens GN=KRT10 PE=1 SV=6	P13645	Uniprot_human_V1.fasta	58828.8	1	23	25	42	0.0058	0.421
Cluster of 40S ribosomal protein S16 OS=Homo sapiens GN=RPS16 PE=1 SV=2 (P62249)	40S ribosomal protein S16 OS=Homo sapiens GN=RPS16 PE=1 SV=2	P62249,Q6IPX4	Uniprot_human_V1.fasta	16445.9	0.998	2	2	2	0.000276	0.144
Cluster of Flavin reductase (NADPH) OS=Homo sapiens GN=BLVRB PE=1 SV=3 (P30043)	Flavin reductase (NADPH) OS=Homo sapiens GN=BLVRB PE=1 SV=3	P30043	Uniprot_human_V1.fasta	22118.7	0.989	2	2	2	0.000276	0.194
Cluster of Peroxiredoxin-6 OS=Homo sapiens GN=PRDX6 PE=1 SV=3 (P30041)	Peroxiredoxin-6 OS=Homo sapiens GN=PRDX6 PE=1 SV=3	P30041	Uniprot_human_V1.fasta	25036.1	1	2	2	2	0.000276	0.0848
Cluster of Polymerase I and transcript release factor OS=Homo sapiens GN=PTRF PE=1 SV=1 (Q6NZI2)	Polymerase I and transcript release factor OS=Homo sapiens GN=PTRF PE=1 SV=1	Q6NZI2	Uniprot_human_V1.fasta	43476.5	0.998	3	3	3	0.000414	0.0872
Cluster of Serpin H1 OS=Homo sapiens GN=SERPINH1 PE=1 SV=2 (P50454)	Serpin H1 OS=Homo sapiens GN=SERPINH1 PE=1 SV=2	P50454	Uniprot_human_V1.fasta	46442	1	2	2	3	0.000414	0.0646
Cluster of 60S ribosomal protein L4 OS=Homo sapiens GN=RPL4 PE=1 SV=5 (P36578)	60S ribosomal protein L4 OS=Homo sapiens GN=RPL4 PE=1 SV=5	P36578	Uniprot_human_V1.fasta	47699.1	1	3	3	4	0.000552	0.0984
Cluster of Keratin, type II cytoskeletal 78 OS=Homo sapiens GN=KRT78 PE=2 SV=2 (Q8N1N4)	Keratin, type II cytoskeletal 78 OS=Homo sapiens GN=KRT78 PE=2 SV=2	Q8N1N4	Uniprot_human_V1.fasta	56866.4	1	5	5	6	0.000828	0.11
Cluster of Cytosol aminopeptidase (Fragment) OS=Homo sapiens GN=LAP3 PE=4 SV=1 (H0Y9Q1)	Cytosol aminopeptidase (Fragment) OS=Homo sapiens GN=LAP3 PE=4 SV=1	H0Y9Q1,P28838,P28838-2	Uniprot_human_V1.fasta	22599.6	1	3	3	3	0.000414	0.177
Cluster of Elongation factor 2 OS=Homo sapiens GN=EEF2 PE=1 SV=4 (P13639)	Elongation factor 2 OS=Homo sapiens GN=EEF2 PE=1 SV=4	P13639	Uniprot_human_V1.fasta	95340.1	1	11	11	11	0.00152	0.14
Cluster of Mimecan OS=Homo sapiens GN=OGN PE=1 SV=1 (P20774)	Mimecan OS=Homo sapiens GN=OGN PE=1 SV=1	P20774	Uniprot_human_V1.fasta	33925	1	3	3	3	0.000414	0.0805
Cluster of Prelamin-A/C OS=Homo sapiens GN=LMNA PE=1 SV=1 (P02545)	Prelamin-A/C OS=Homo sapiens GN=LMNA PE=1 SV=1	P02545	Uniprot_human_V1.fasta	74140.7	1	14	14	14	0.00193	0.279
Cluster of Hemopexin OS=Homo sapiens GN=HPX PE=1 SV=2 (P02790)	Hemopexin OS=Homo sapiens GN=HPX PE=1 SV=2	P02790	Uniprot_human_V1.fasta	51676.5	1	4	4	4	0.000552	0.141
Cluster of Retinal dehydrogenase 1 OS=Homo sapiens GN=ALDH1A1 PE=1 SV=2 (P00352)	Retinal dehydrogenase 1 OS=Homo sapiens GN=ALDH1A1 PE=1 SV=2	P00352	Uniprot_human_V1.fasta	54862.8	0.998	2	2	3	0.000414	0.0399
Cluster of Histone H2A type 1-B/E OS=Homo sapiens GN=HIST1H2AB PE=1 SV=2 (P04908)	Histone H2A type 1 OS=Homo sapiens GN=HIST1H2AG PE=1 SV=2	P0C0S8,P20671,Q16777,Q6FI13,Q96KK5,Q99878,Q9BTM1,Q9BTM1-2	Uniprot_human_V1.fasta	14092.1	0.062	1	1	4	0.000552	0.154
Cluster of Annexin OS=Homo sapiens GN=ANXA6 PE=3 SV=3 (A6NN80)	Annexin OS=Homo sapiens GN=ANXA6 PE=3 SV=3	A6NN80,E9PGK1,P08133	Uniprot_human_V1.fasta	75280.8	1	9	9	9	0.00124	0.142
Cluster of Hemoglobin subunit beta OS=Homo sapiens GN=HBB PE=1 SV=2 (P68871)	Hemoglobin subunit beta OS=Homo sapiens GN=HBB PE=1 SV=2	P68871	Uniprot_human_V1.fasta	15998	1	3	4	16	0.00221	0.667
Cluster of Peptidyl-prolyl cis-trans isomerase B OS=Homo sapiens GN=PPIB PE=1 SV=2 (P23284)	Peptidyl-prolyl cis-trans isomerase B OS=Homo sapiens GN=PPIB PE=1 SV=2	P23284	Uniprot_human_V1.fasta	23743.2	1	5	5	6	0.000828	0.227
Cluster of Tubulin beta chain OS=Homo sapiens GN=TUBB PE=3 SV=1 (F8VUJ7)	Tubulin beta-4B chain OS=Homo sapiens GN=TUBB4B PE=1 SV=1	P68371	Uniprot_human_V1.fasta	49830.7	1	2	2	13	0.00179	0.213
Cluster of EH domain-containing protein 2 OS=Homo sapiens GN=EHD2 PE=1 SV=2 (Q9NZN4)	EH domain-containing protein 2 OS=Homo sapiens GN=EHD2 PE=1 SV=2	Q9NZN4	Uniprot_human_V1.fasta	61163.2	1	2	2	3	0.000414	0.0405
Cluster of Collagen alpha-2(I) chain OS=Homo sapiens GN=COL1A2 PE=1 SV=7 (P08123)	Collagen alpha-2(I) chain OS=Homo sapiens GN=COL1A2 PE=1 SV=7	P08123	Uniprot_human_V1.fasta	129315	1	6	7	7	0.000966	0.0578
Cluster of 60S ribosomal protein L23 OS=Homo sapiens GN=RPL23 PE=3 SV=1 (B9ZVP7)	60S ribosomal protein L23 OS=Homo sapiens GN=RPL23 PE=3 SV=1	B9ZVP7,C9JD32,J3KT29,P62829	Uniprot_human_V1.fasta	12099.7	1	2	2	2	0.000276	0.307
Cluster of HLA class II histocompatibility antigen gamma chain OS=Homo sapiens GN=CD74 PE=4 SV=1 (E7EQJ3)	HLA class II histocompatibility antigen gamma chain OS=Homo sapiens GN=CD74 PE=4 SV=1	E7EQJ3,E7ESL3,H0YBZ2,H0YBZ8,P04233,P04233-2,P04233-3	Uniprot_human_V1.fasta	13917	1	2	2	2	0.000276	0.139
Cluster of Adenine phosphoribosyltransferase OS=Homo sapiens GN=APRT PE=4 SV=1 (G5E9J2)	Adenine phosphoribosyltransferase OS=Homo sapiens GN=APRT PE=4 SV=1	G5E9J2,H3BQB1,H3BQF1,H3BQZ9,H3BSW3,P07741	Uniprot_human_V1.fasta	14557.5	1	3	3	3	0.000414	0.254
Cluster of Tubulin alpha-4A chain OS=Homo sapiens GN=TUBA4A PE=2 SV=1 (A8MUB1)	Tubulin alpha-4A chain OS=Homo sapiens GN=TUBA4A PE=2 SV=1	A8MUB1,P68366	Uniprot_human_V1.fasta	48329	1	4	4	9	0.00124	0.27
Cluster of Transketolase OS=Homo sapiens GN=TKT PE=2 SV=1 (B4E022)	Transketolase OS=Homo sapiens GN=TKT PE=2 SV=1	B4E022,E7EPA7,P29401	Uniprot_human_V1.fasta	62880.7	1	3	3	3	0.000414	0.0729
Cluster of Heat shock protein beta-1 OS=Homo sapiens GN=HSPB1 PE=1 SV=2 (P04792)	Heat shock protein beta-1 OS=Homo sapiens GN=HSPB1 PE=1 SV=2	P04792	Uniprot_human_V1.fasta	22782.6	1	2	2	2	0.000276	0.132
Cluster of Isoform LMW of Kininogen-1 OS=Homo sapiens GN=KNG1 (P01042-2)	Isoform LMW of Kininogen-1 OS=Homo sapiens GN=KNG1	P01042-2	Uniprot_human_V1.fasta	47883.6	1	3	4	4	0.000552	0.0749
Cluster of Profilin-1 OS=Homo sapiens GN=PFN1 PE=1 SV=2 (P07737)	Profilin-1 OS=Homo sapiens GN=PFN1 PE=1 SV=2	P07737	Uniprot_human_V1.fasta	15054.3	1	5	5	6	0.000828	0.436
Cluster of Galectin-1 OS=Homo sapiens GN=LGALS1 PE=1 SV=2 (P09382)	Galectin-1 OS=Homo sapiens GN=LGALS1 PE=1 SV=2	P09382	Uniprot_human_V1.fasta	14715.8	1	3	3	3	0.000414	0.259
Cluster of Complement factor H OS=Homo sapiens GN=CFH PE=1 SV=4 (P08603)	Complement factor H OS=Homo sapiens GN=CFH PE=1 SV=4	P08603	Uniprot_human_V1.fasta	139096	1	3	3	3	0.000414	0.0268
Cluster of Protein disulfide-isomerase OS=Homo sapiens GN=P4HB PE=3 SV=1 (F5H8J2)	Protein disulfide-isomerase OS=Homo sapiens GN=P4HB PE=3 SV=1	F5H8J2,H7BZ94,I3L2P8,P07237	Uniprot_human_V1.fasta	51127.4	1	4	4	4	0.000552	0.0998
Cluster of Alpha-1B-glycoprotein OS=Homo sapiens GN=A1BG PE=1 SV=4 (P04217)	Alpha-1B-glycoprotein OS=Homo sapiens GN=A1BG PE=1 SV=4	P04217	Uniprot_human_V1.fasta	54253.3	1	5	5	5	0.00069	0.141
Cluster of Heat shock 70 kDa protein 1A/1B OS=Homo sapiens GN=HSPA1A PE=1 SV=5 (P08107)	Heat shock 70 kDa protein 1A/1B OS=Homo sapiens GN=HSPA1A PE=1 SV=5	P08107	Uniprot_human_V1.fasta	70054	1	4	5	7	0.000966	0.119
Cluster of Immunoglobulin J chain OS=Homo sapiens GN=IGJ PE=1 SV=4 (P01591)	Immunoglobulin J chain OS=Homo sapiens GN=IGJ PE=1 SV=4	P01591	Uniprot_human_V1.fasta	18098.5	1	6	7	7	0.000966	0.377
Cluster of Histone H4 OS=Homo sapiens GN=HIST1H4A PE=1 SV=2 (P62805)	Histone H4 OS=Homo sapiens GN=HIST1H4A PE=1 SV=2	P62805	Uniprot_human_V1.fasta	11367.7	1	7	9	11	0.00152	0.33
Cluster of HLA class I histocompatibility antigen, Cw-4 alpha chain OS=Homo sapiens GN=HLA-C PE=1 SV=1 (P30504)	HLA class I histocompatibility antigen, Cw-17 alpha chain OS=Homo sapiens GN=HLA-C PE=1 SV=1	Q95604	Uniprot_human_V1.fasta	41237.9	0.997	1	1	4	0.000552	0.116
Cluster of 60S ribosomal protein L6 (Fragment) OS=Homo sapiens GN=RPL6 PE=3 SV=1 (F8W181)	60S ribosomal protein L6 (Fragment) OS=Homo sapiens GN=RPL6 PE=3 SV=1	F8W181,Q02878	Uniprot_human_V1.fasta	32729.3	1	2	2	2	0.000276	0.0841
Cluster of Histone H3 OS=Homo sapiens GN=H3F3A PE=2 SV=1 (B4DEB1)	Histone H3 OS=Homo sapiens GN=HIST2H3PS2 PE=3 SV=1	Q5TEC6	Uniprot_human_V1.fasta	15430.7	0.439	1	1	3	0.000414	0.199
Cluster of Ubiquitin OS=Homo sapiens GN=UBB PE=2 SV=1 (B4DV12)	Ubiquitin OS=Homo sapiens GN=UBB PE=2 SV=1	B4DV12,F5GXK7,F5GYU3,F5H041,F5H265,F5H2Z3,F5H388,F5H6Q2,F5H747,F5H7K6,F5H7Y5,J3QKN0,J3QS39,J3QTR3,P0CG47,P0CG48,P62979,P62987,Q96C32	Uniprot_human_V1.fasta	17215.6	1	4	4	4	0.000552	0.288
Cluster of Collagen alpha-1(I) chain OS=Homo sapiens GN=COL1A1 PE=1 SV=5 (P02452)	Collagen alpha-1(I) chain OS=Homo sapiens GN=COL1A1 PE=1 SV=5	P02452	Uniprot_human_V1.fasta	138941	1	11	11	12	0.00166	0.112
Cluster of Tubulin alpha-1A chain OS=Homo sapiens GN=TUBA1A PE=3 SV=1 (G3V1U9)	Tubulin alpha-1A chain OS=Homo sapiens GN=TUBA1A PE=3 SV=1	G3V1U9,Q71U36	Uniprot_human_V1.fasta	46297.5	1	4	4	9	0.00124	0.308
Cluster of Clathrin heavy chain 1 OS=Homo sapiens GN=CLTC PE=1 SV=5 (Q00610)	Clathrin heavy chain 1 OS=Homo sapiens GN=CLTC PE=1 SV=5	Q00610,Q00610-2	Uniprot_human_V1.fasta	191619	1	3	3	3	0.000414	0.0245
Cluster of Peroxiredoxin-1 OS=Homo sapiens GN=PRDX1 PE=1 SV=1 (Q06830)	Peroxiredoxin-4 (Fragment) OS=Homo sapiens GN=PRDX4 PE=4 SV=1	H7C3T4,Q13162	Uniprot_human_V1.fasta	18326.1	1	1	1	4	0.000552	0.143
Cluster of Peroxiredoxin-2 OS=Homo sapiens GN=PRDX2 PE=1 SV=5 (P32119)	Peroxiredoxin-2 OS=Homo sapiens GN=PRDX2 PE=1 SV=5	P32119	Uniprot_human_V1.fasta	21892.4	1	3	3	3	0.000414	0.182
Cluster of HLA class I histocompatibility antigen, Cw-4 alpha chain OS=Homo sapiens GN=HLA-C PE=1 SV=1 (P30504)	HLA class I histocompatibility antigen, Cw-4 alpha chain OS=Homo sapiens GN=HLA-C PE=1 SV=1	P30504,P30508,P30510	Uniprot_human_V1.fasta	40994.5	1	2	2	4	0.000552	0.156
Cluster of Annexin A1 OS=Homo sapiens GN=ANXA1 PE=1 SV=2 (P04083)	Annexin A1 OS=Homo sapiens GN=ANXA1 PE=1 SV=2	P04083	Uniprot_human_V1.fasta	38715.9	0.999	2	2	2	0.000276	0.0636
Cluster of Keratin, type II cytoskeletal 2 epidermal OS=Homo sapiens GN=KRT2 PE=1 SV=2 (P35908)	Keratin, type II cytoskeletal 2 epidermal OS=Homo sapiens GN=KRT2 PE=1 SV=2	P35908	Uniprot_human_V1.fasta	65433.9	1	17	19	37	0.00511	0.477
Cluster of Extracellular superoxide dismutase [Cu-Zn] OS=Homo sapiens GN=SOD3 PE=1 SV=2 (P08294)	Extracellular superoxide dismutase [Cu-Zn] OS=Homo sapiens GN=SOD3 PE=1 SV=2	P08294	Uniprot_human_V1.fasta	25850.3	1	3	3	3	0.000414	0.154
Cluster of 40S ribosomal protein S19 OS=Homo sapiens GN=RPS19 PE=1 SV=2 (P39019)	40S ribosomal protein S19 OS=Homo sapiens GN=RPS19 PE=1 SV=2	P39019	Uniprot_human_V1.fasta	16060.5	0.999	3	3	3	0.000414	0.138
Cluster of Rab GDP dissociation inhibitor beta OS=Homo sapiens GN=GDI2 PE=4 SV=1 (E7EU23)	Rab GDP dissociation inhibitor beta OS=Homo sapiens GN=GDI2 PE=4 SV=1	E7EU23,P50395,P50395-2	Uniprot_human_V1.fasta	51183.5	0.996	2	2	2	0.000276	0.0468
Cluster of 40S ribosomal protein SA (Fragment) OS=Homo sapiens GN=RPSA PE=3 SV=1 (C9J9K3)	40S ribosomal protein SA (Fragment) OS=Homo sapiens GN=RPSA PE=3 SV=1	C9J9K3,P08865	Uniprot_human_V1.fasta	29505.9	1	2	2	2	0.000276	0.133
Cluster of 3-hydroxyacyl-CoA dehydrogenase type-2 OS=Homo sapiens GN=HSD17B10 PE=1 SV=3 (Q99714)	3-hydroxyacyl-CoA dehydrogenase type-2 OS=Homo sapiens GN=HSD17B10 PE=1 SV=3	Q99714,Q99714-2	Uniprot_human_V1.fasta	26923.1	1	2	2	2	0.000276	0.172
Cluster of 40S ribosomal protein S13 OS=Homo sapiens GN=RPS13 PE=4 SV=1 (J3KMX5)	40S ribosomal protein S13 OS=Homo sapiens GN=RPS13 PE=4 SV=1	J3KMX5,P62277	Uniprot_human_V1.fasta	16733.4	1	2	2	2	0.000276	0.0878
Cluster of Histone H1x OS=Homo sapiens GN=H1FX PE=1 SV=1 (Q92522)	Histone H1x OS=Homo sapiens GN=H1FX PE=1 SV=1	Q92522	Uniprot_human_V1.fasta	22487.9	1	2	2	2	0.000276	0.103
Cluster of Decorin OS=Homo sapiens GN=DCN PE=1 SV=1 (P07585)	Decorin OS=Homo sapiens GN=DCN PE=1 SV=1	P07585	Uniprot_human_V1.fasta	39748.2	1	4	4	4	0.000552	0.148
Cluster of Fibronectin OS=Homo sapiens GN=FN1 PE=4 SV=1 (E9PE77)	Fibronectin OS=Homo sapiens GN=FN1 PE=4 SV=1	E9PE77,F8W7G7,P02751,P02751-10,P02751-11,P02751-12,P02751-13,P02751-14,P02751-15,P02751-3,P02751-5,P02751-7,P02751-8,P02751-9	Uniprot_human_V1.fasta	256494	1	9	9	9	0.00124	0.0571
Cluster of Plasma cell-induced resident endoplasmic reticulum protein OS=Homo sapiens GN=PACAP PE=1 SV=1 (Q8WU39)	Plasma cell-induced resident endoplasmic reticulum protein OS=Homo sapiens GN=PACAP PE=1 SV=1	Q8WU39	Uniprot_human_V1.fasta	20694.6	1	6	7	7	0.000966	0.524
Cluster of T-complex protein 1 subunit gamma OS=Homo sapiens GN=CCT3 PE=2 SV=1 (B4DUR8)	T-complex protein 1 subunit gamma OS=Homo sapiens GN=CCT3 PE=2 SV=1	B4DUR8,P49368,P49368-2	Uniprot_human_V1.fasta	55675.6	0.999	2	2	2	0.000276	0.046
Cluster of Thymidine phosphorylase (Fragment) OS=Homo sapiens GN=TYMP PE=4 SV=1 (C9JGI3)	Thymidine phosphorylase (Fragment) OS=Homo sapiens GN=TYMP PE=4 SV=1	C9JGI3,H9KVA0,P19971	Uniprot_human_V1.fasta	46087.4	1	3	3	3	0.000414	0.0899
Cluster of Mast cell carboxypeptidase A OS=Homo sapiens GN=CPA3 PE=1 SV=2 (P15088)	Mast cell carboxypeptidase A OS=Homo sapiens GN=CPA3 PE=1 SV=2	P15088	Uniprot_human_V1.fasta	48671.8	1	4	4	4	0.000552	0.0935
Cluster of Eukaryotic initiation factor 4A-II OS=Homo sapiens GN=EIF4A2 PE=3 SV=1 (E7EQG2)	Eukaryotic initiation factor 4A-II OS=Homo sapiens GN=EIF4A2 PE=3 SV=1	E7EQG2,P60842,Q14240,Q14240-2,Q9NZE6	Uniprot_human_V1.fasta	41291.6	0.999	2	2	2	0.000276	0.047
Cluster of Complement C3 OS=Homo sapiens GN=C3 PE=1 SV=2 (P01024)	Complement C3 OS=Homo sapiens GN=C3 PE=1 SV=2	P01024	Uniprot_human_V1.fasta	187149	1	14	16	16	0.00221	0.124
Cluster of Alpha-2-macroglobulin OS=Homo sapiens GN=A2M PE=1 SV=3 (P01023)	Alpha-2-macroglobulin OS=Homo sapiens GN=A2M PE=1 SV=3	P01023	Uniprot_human_V1.fasta	163290	1	15	15	17	0.00235	0.133
Cluster of Serotransferrin OS=Homo sapiens GN=TF PE=1 SV=3 (P02787)	Serotransferrin OS=Homo sapiens GN=TF PE=1 SV=3	P02787	Uniprot_human_V1.fasta	77064.3	1	16	16	17	0.00235	0.265
Cluster of Alpha-1-antichymotrypsin His-Pro-less OS=Homo sapiens GN=SERPINA3 PE=3 SV=1 (G3V5I3)	Alpha-1-antichymotrypsin His-Pro-less OS=Homo sapiens GN=SERPINA3 PE=3 SV=1	G3V5I3,P01011	Uniprot_human_V1.fasta	50600.5	1	5	5	5	0.00069	0.129
Cluster of Putative zinc-alpha-2-glycoprotein-like 1 OS=Homo sapiens PE=5 SV=2 (A8MT79)	Putative zinc-alpha-2-glycoprotein-like 1 OS=Homo sapiens PE=5 SV=2	A8MT79,P25311	Uniprot_human_V1.fasta	22979.5	0.999	2	2	2	0.000276	0.098
Cluster of Filamin-A OS=Homo sapiens GN=FLNA PE=1 SV=4 (P21333)	Filamin-A OS=Homo sapiens GN=FLNA PE=1 SV=4	P21333,P21333-2	Uniprot_human_V1.fasta	280729	1	16	16	16	0.00221	0.0922
Cluster of Fibrillin-1 OS=Homo sapiens GN=FBN1 PE=1 SV=3 (P35555)	Fibrillin-1 OS=Homo sapiens GN=FBN1 PE=1 SV=3	P35555	Uniprot_human_V1.fasta	312226	1	15	15	15	0.00207	0.0658
Cluster of Alpha-1-antitrypsin OS=Homo sapiens GN=SERPINA1 PE=1 SV=3 (P01009)	Alpha-1-antitrypsin OS=Homo sapiens GN=SERPINA1 PE=1 SV=3	P01009	Uniprot_human_V1.fasta	46737.9	1	6	6	6	0.000828	0.151
Cluster of Antithrombin-III OS=Homo sapiens GN=SERPINC1 PE=1 SV=1 (P01008)	Antithrombin-III OS=Homo sapiens GN=SERPINC1 PE=1 SV=1	P01008	Uniprot_human_V1.fasta	52604.1	0.998	3	3	3	0.000414	0.0647
Cluster of Cytoplasmic dynein 1 heavy chain 1 OS=Homo sapiens GN=DYNC1H1 PE=1 SV=5 (Q14204)	Cytoplasmic dynein 1 heavy chain 1 OS=Homo sapiens GN=DYNC1H1 PE=1 SV=5	Q14204	Uniprot_human_V1.fasta	532406	0.999	2	2	2	0.000276	0.0043
Cluster of LIM and SH3 domain protein 1 OS=Homo sapiens GN=LASP1 PE=1 SV=2 (Q14847)	LIM and SH3 domain protein 1 OS=Homo sapiens GN=LASP1 PE=1 SV=2	Q14847	Uniprot_human_V1.fasta	29716.8	1	2	2	2	0.000276	0.111
Cluster of Serum albumin OS=Homo sapiens GN=ALB PE=1 SV=2 (P02768)	Serum albumin OS=Homo sapiens GN=ALB PE=1 SV=2	P02768	Uniprot_human_V1.fasta	69366.9	1	38	46	62	0.00856	0.522
Cluster of Transthyretin OS=Homo sapiens GN=TTR PE=1 SV=1 (P02766)	Transthyretin OS=Homo sapiens GN=TTR PE=1 SV=1	P02766	Uniprot_human_V1.fasta	15886.9	1	3	3	3	0.000414	0.347
Cluster of Alpha-2-HS-glycoprotein chain A OS=Homo sapiens GN=AHSG PE=4 SV=1 (C9JV77)	Alpha-2-HS-glycoprotein chain A OS=Homo sapiens GN=AHSG PE=4 SV=1	C9JV77,P02765	Uniprot_human_V1.fasta	39410.5	1	4	4	4	0.000552	0.177
Cluster of Plastin-2 OS=Homo sapiens GN=LCP1 PE=2 SV=1 (B4DUA0)	Plastin-2 OS=Homo sapiens GN=LCP1 PE=2 SV=1	B4DUA0,P13796	Uniprot_human_V1.fasta	21793.3	0.999	2	2	2	0.000276	0.117
Cluster of Trypstatin OS=Homo sapiens GN=AMBP PE=2 SV=1 (B7Z8R6)	Trypstatin OS=Homo sapiens GN=AMBP PE=2 SV=1	B7Z8R6,P02760	Uniprot_human_V1.fasta	29778.2	1	4	4	6	0.000828	0.248
Cluster of HLA class II histocompatibility antigen, DRB1-11 beta chain OS=Homo sapiens GN=HLA-DRB1 PE=1 SV=1 (P20039)	HLA class II histocompatibility antigen, DRB1-11 beta chain OS=Homo sapiens GN=HLA-DRB1 PE=1 SV=1	P20039	Uniprot_human_V1.fasta	30159.5	0.867	0	0	2	0.000276	0.12
Cluster of HLA class II histocompatibility antigen, DRB1-11 beta chain OS=Homo sapiens GN=HLA-DRB1 PE=1 SV=1 (P20039)	HLA class II histocompatibility antigen, DRB1-15 beta chain OS=Homo sapiens GN=HLA-DRB1 PE=1 SV=2	P01911,P01912,Q5Y7A7	Uniprot_human_V1.fasta	29965.5	0.591	0	0	2	0.000276	0.12
Cluster of Peroxiredoxin-1 OS=Homo sapiens GN=PRDX1 PE=1 SV=1 (Q06830)	Peroxiredoxin-1 OS=Homo sapiens GN=PRDX1 PE=1 SV=1	Q06830	Uniprot_human_V1.fasta	22110.9	0.852	2	2	5	0.00069	0.151
Cluster of 40S ribosomal protein S20 OS=Homo sapiens GN=RPS20 PE=1 SV=1 (P60866)	40S ribosomal protein S20 OS=Homo sapiens GN=RPS20 PE=1 SV=1	P60866,P60866-2	Uniprot_human_V1.fasta	13373	0.954	2	2	2	0.000276	0.193
Cluster of Tubulin beta chain OS=Homo sapiens GN=TUBB PE=3 SV=1 (F8VUJ7)	Tubulin beta chain OS=Homo sapiens GN=TUBB PE=3 SV=1	F8VUJ7,F8VW92,F8VYX6,P07437,Q5JP53	Uniprot_human_V1.fasta	46510.4	1	2	2	15	0.00207	0.236
Cluster of Vitronectin OS=Homo sapiens GN=VTN PE=1 SV=1 (P04004)	Vitronectin OS=Homo sapiens GN=VTN PE=1 SV=1	P04004	Uniprot_human_V1.fasta	54306.1	1	3	3	3	0.000414	0.0628
Cluster of Histone H1.3 OS=Homo sapiens GN=HIST1H1D PE=1 SV=2 (P16402)	Histone H1.3 OS=Homo sapiens GN=HIST1H1D PE=1 SV=2	P16402	Uniprot_human_V1.fasta	22351.3	1	6	6	6	0.000828	0.195
Cluster of Histone H1.5 OS=Homo sapiens GN=HIST1H1B PE=1 SV=3 (P16401)	Histone H1.5 OS=Homo sapiens GN=HIST1H1B PE=1 SV=3	P16401	Uniprot_human_V1.fasta	22581.7	1	3	3	3	0.000414	0.106
Cluster of Transaldolase OS=Homo sapiens GN=TALDO1 PE=1 SV=2 (P37837)	Transaldolase OS=Homo sapiens GN=TALDO1 PE=1 SV=2	P37837	Uniprot_human_V1.fasta	37541.7	1	3	3	3	0.000414	0.0831
Cluster of Ig alpha-1 chain C region OS=Homo sapiens GN=IGHA1 PE=1 SV=2 (P01876)	Ig alpha-1 chain C region OS=Homo sapiens GN=IGHA1 PE=1 SV=2	P01876	Uniprot_human_V1.fasta	37653.8	1	19	22	47	0.00649	0.657
Cluster of Collagen alpha-2(VI) chain OS=Homo sapiens GN=COL6A2 PE=1 SV=4 (P12110)	Collagen alpha-2(VI) chain OS=Homo sapiens GN=COL6A2 PE=1 SV=4	P12110,P12110-2,P12110-3	Uniprot_human_V1.fasta	108581	1	5	5	5	0.00069	0.0393
Cluster of Serum amyloid P-component OS=Homo sapiens GN=APCS PE=1 SV=2 (P02743)	Serum amyloid P-component OS=Homo sapiens GN=APCS PE=1 SV=2	P02743	Uniprot_human_V1.fasta	25387.7	1	5	6	6	0.000828	0.233
Cluster of Malate dehydrogenase, mitochondrial OS=Homo sapiens GN=MDH2 PE=3 SV=1 (E9PDB2)	Malate dehydrogenase, mitochondrial OS=Homo sapiens GN=MDH2 PE=3 SV=1	E9PDB2,P40926	Uniprot_human_V1.fasta	30875.4	0.99	2	2	2	0.000276	0.0946
Cluster of Heat shock protein HSP 90-alpha OS=Homo sapiens GN=HSP90AA1 PE=1 SV=5 (P07900)	Heat shock protein HSP 90-alpha OS=Homo sapiens GN=HSP90AA1 PE=1 SV=5	P07900,P07900-2	Uniprot_human_V1.fasta	84663.2	0.94	2	2	4	0.000552	0.056
Cluster of Vimentin OS=Homo sapiens GN=VIM PE=1 SV=4 (P08670)	Desmin OS=Homo sapiens GN=DES PE=1 SV=3	P17661	Uniprot_human_V1.fasta	53536.6	1	6	7	10	0.00138	0.26
Cluster of Keratin, type I cytoskeletal 10 OS=Homo sapiens GN=KRT10 PE=1 SV=6 (P13645)	Keratin, type I cytoskeletal 16 OS=Homo sapiens GN=KRT16 PE=1 SV=4	P08779	Uniprot_human_V1.fasta	51269	1	3	3	16	0.00221	0.195
Cluster of Ig gamma-1 chain C region OS=Homo sapiens GN=IGHG1 PE=1 SV=1 (P01857)	Ig gamma-4 chain C region OS=Homo sapiens GN=IGHG4 PE=1 SV=1	P01861	Uniprot_human_V1.fasta	35939.5	0.999	2	2	10	0.00138	0.391
Cluster of Ig gamma-1 chain C region OS=Homo sapiens GN=IGHG1 PE=1 SV=1 (P01857)	Ig gamma-3 chain C region OS=Homo sapiens GN=IGHG3 PE=1 SV=2	P01860	Uniprot_human_V1.fasta	41285.9	0.999	1	1	13	0.00179	0.268
Cluster of Adenosylhomocysteinase OS=Homo sapiens GN=AHCY PE=1 SV=4 (P23526)	Adenosylhomocysteinase OS=Homo sapiens GN=AHCY PE=1 SV=4	P23526	Uniprot_human_V1.fasta	47717.1	0.998	2	2	2	0.000276	0.044
Cluster of CD44 antigen OS=Homo sapiens GN=CD44 PE=4 SV=2 (E7EPC6)	CD44 antigen OS=Homo sapiens GN=CD44 PE=4 SV=2	E7EPC6,H0Y2P0,H0Y5E4,H0YCV9,H0YD13,H0YD17,H0YDW7,H0YDX6,P16070,P16070-10,P16070-11,P16070-12,P16070-13,P16070-14,P16070-15,P16070-16,P16070-17,P16070-18,P16070-3,P16070-4,P16070-5,P16070-6,P16070-7,P16070-8,P16070-9	Uniprot_human_V1.fasta	78516.5	1	2	3	3	0.000414	0.0308
Cluster of Band 3 anion transport protein OS=Homo sapiens GN=SLC4A1 PE=1 SV=3 (P02730)	Band 3 anion transport protein OS=Homo sapiens GN=SLC4A1 PE=1 SV=3	P02730	Uniprot_human_V1.fasta	101796	0.996	2	2	2	0.000276	0.0362
Cluster of Caldesmon (Fragment) OS=Homo sapiens GN=CALD1 PE=4 SV=1 (C9J813)	Caldesmon (Fragment) OS=Homo sapiens GN=CALD1 PE=4 SV=1	C9J813,E7EX44,E9PGZ1,F5H1Z9,Q05682,Q05682-2,Q05682-3,Q05682-4,Q05682-5,Q05682-6	Uniprot_human_V1.fasta	93231.7	1	2	2	2	0.000276	0.0654
Cluster of Dihydropyrimidinase-related protein 2 OS=Homo sapiens GN=DPYSL2 PE=2 SV=1 (B4DR31)	Dihydropyrimidinase-related protein 3 (Fragment) OS=Homo sapiens GN=DPYSL3 PE=4 SV=1	H0YBT4,Q14195,Q14195-2	Uniprot_human_V1.fasta	21957.6	0.998	2	2	4	0.000552	0.215
Cluster of Fibrinogen gamma chain OS=Homo sapiens GN=FGG PE=4 SV=1 (C9JC84)	Fibrinogen gamma chain OS=Homo sapiens GN=FGG PE=4 SV=1	C9JC84,C9JEU5,P02679,P02679-2	Uniprot_human_V1.fasta	52339.2	1	8	8	10	0.00138	0.243
Cluster of Collagen alpha-1(XV) chain OS=Homo sapiens GN=COL15A1 PE=1 SV=2 (P39059)	Collagen alpha-1(XV) chain OS=Homo sapiens GN=COL15A1 PE=1 SV=2	P39059	Uniprot_human_V1.fasta	141722	0.999	3	3	3	0.000414	0.0259
Cluster of Ig gamma-1 chain C region OS=Homo sapiens GN=IGHG1 PE=1 SV=1 (P01857)	Ig gamma-2 chain C region OS=Homo sapiens GN=IGHG2 PE=1 SV=2	P01859	Uniprot_human_V1.fasta	35899.2	1	2	2	13	0.00179	0.34
Cluster of Ig gamma-1 chain C region OS=Homo sapiens GN=IGHG1 PE=1 SV=1 (P01857)	Ig gamma-1 chain C region OS=Homo sapiens GN=IGHG1 PE=1 SV=1	P01857	Uniprot_human_V1.fasta	36105	1	7	9	28	0.00387	0.639
Cluster of Sialic acid synthase OS=Homo sapiens GN=NANS PE=1 SV=2 (Q9NR45)	Sialic acid synthase OS=Homo sapiens GN=NANS PE=1 SV=2	Q9NR45	Uniprot_human_V1.fasta	40307.9	1	2	2	2	0.000276	0.078
Cluster of Ras GTPase-activating-like protein IQGAP1 OS=Homo sapiens GN=IQGAP1 PE=1 SV=1 (P46940)	Ras GTPase-activating-like protein IQGAP1 OS=Homo sapiens GN=IQGAP1 PE=1 SV=1	P46940	Uniprot_human_V1.fasta	189259	0.999	3	3	3	0.000414	0.0199
Cluster of Endoplasmin OS=Homo sapiens GN=HSP90B1 PE=1 SV=1 (P14625)	Endoplasmin OS=Homo sapiens GN=HSP90B1 PE=1 SV=1	P14625	Uniprot_human_V1.fasta	92471.7	1	11	12	14	0.00193	0.188
Cluster of Transforming growth factor-beta-induced protein ig-h3 OS=Homo sapiens GN=TGFBI PE=4 SV=1 (G8JLA8)	Transforming growth factor-beta-induced protein ig-h3 OS=Homo sapiens GN=TGFBI PE=4 SV=1	G8JLA8,Q15582	Uniprot_human_V1.fasta	74695.8	1	6	6	6	0.000828	0.12
Cluster of Gelsolin OS=Homo sapiens GN=GSN PE=4 SV=1 (F5H1A8)	Gelsolin OS=Homo sapiens GN=GSN PE=4 SV=1	F5H1A8,P06396,P06396-2,P06396-3	Uniprot_human_V1.fasta	81484.9	1	5	5	5	0.00069	0.0812
Cluster of Annexin A5 OS=Homo sapiens GN=ANXA5 PE=1 SV=2 (P08758)	Annexin A5 OS=Homo sapiens GN=ANXA5 PE=1 SV=2	P08758	Uniprot_human_V1.fasta	35938.6	1	6	6	6	0.000828	0.153
Cluster of 14-3-3 protein beta/alpha OS=Homo sapiens GN=YWHAB PE=1 SV=3 (P31946)	14-3-3 protein beta/alpha OS=Homo sapiens GN=YWHAB PE=1 SV=3	P31946,P31946-2,P61981,Q4VY19,Q4VY20	Uniprot_human_V1.fasta	28083.1	1	2	2	2	0.000276	0.0691
Cluster of Calpain-1 catalytic subunit OS=Homo sapiens GN=CAPN1 PE=1 SV=1 (P07384)	Calpain-1 catalytic subunit OS=Homo sapiens GN=CAPN1 PE=1 SV=1	P07384	Uniprot_human_V1.fasta	81892.6	0.933	2	2	2	0.000276	0.0224
Cluster of Spectrin beta chain, non-erythrocytic 1 OS=Homo sapiens GN=SPTBN1 PE=1 SV=2 (Q01082)	Spectrin beta chain, non-erythrocytic 1 OS=Homo sapiens GN=SPTBN1 PE=1 SV=2	Q01082,Q01082-2,Q01082-3	Uniprot_human_V1.fasta	274613	0.999	2	2	2	0.000276	0.00719
Cluster of Pyruvate kinase isozymes M1/M2 OS=Homo sapiens GN=PKM PE=1 SV=4 (P14618)	Pyruvate kinase isozymes M1/M2 OS=Homo sapiens GN=PKM PE=1 SV=4	P14618	Uniprot_human_V1.fasta	57937.5	1	6	6	7	0.000966	0.194
Cluster of BTB/POZ domain-containing protein KCTD12 OS=Homo sapiens GN=KCTD12 PE=1 SV=1 (Q96CX2)	BTB/POZ domain-containing protein KCTD12 OS=Homo sapiens GN=KCTD12 PE=1 SV=1	Q96CX2	Uniprot_human_V1.fasta	35701.8	1	2	2	2	0.000276	0.0677
Cluster of Transforming protein RhoA OS=Homo sapiens GN=RHOA PE=1 SV=1 (P61586)	Transforming protein RhoA OS=Homo sapiens GN=RHOA PE=1 SV=1	P61586	Uniprot_human_V1.fasta	21768.4	1	2	2	2	0.000276	0.104
Cluster of Ig kappa chain C region OS=Homo sapiens GN=IGKC PE=1 SV=1 (P01834)	Ig kappa chain C region OS=Homo sapiens GN=IGKC PE=1 SV=1	P01834	Uniprot_human_V1.fasta	11608.6	1	5	5	9	0.00124	0.67
Cluster of Protein disulfide-isomerase A6 OS=Homo sapiens GN=PDIA6 PE=3 SV=1 (B5MCQ5)	Protein disulfide-isomerase A6 OS=Homo sapiens GN=PDIA6 PE=3 SV=1	B5MCQ5,B7Z254,F8WA83,Q15084,Q15084-2	Uniprot_human_V1.fasta	53262.4	1	4	4	4	0.000552	0.082
Cluster of Hornerin OS=Homo sapiens GN=HRNR PE=1 SV=2 (Q86YZ3)	Hornerin OS=Homo sapiens GN=HRNR PE=1 SV=2	Q86YZ3	Uniprot_human_V1.fasta	282373	0.999	3	3	3	0.000414	0.0361
Cluster of Basement membrane-specific heparan sulfate proteoglycan core protein OS=Homo sapiens GN=HSPG2 PE=1 SV=4 (P98160)	Basement membrane-specific heparan sulfate proteoglycan core protein OS=Homo sapiens GN=HSPG2 PE=1 SV=4	P98160	Uniprot_human_V1.fasta	468811	1	21	21	21	0.0029	0.0697
Cluster of 40S ribosomal protein S3 OS=Homo sapiens GN=RPS3 PE=3 SV=1 (J3KN86)	40S ribosomal protein S3 OS=Homo sapiens GN=RPS3 PE=3 SV=1	J3KN86,P23396	Uniprot_human_V1.fasta	28487.1	1	5	5	5	0.00069	0.154
Cluster of Calponin-1 OS=Homo sapiens GN=CNN1 PE=1 SV=2 (P51911)	Calponin-1 OS=Homo sapiens GN=CNN1 PE=1 SV=2	P51911	Uniprot_human_V1.fasta	33171	1	3	3	3	0.000414	0.111
Cluster of Integrin-linked protein kinase OS=Homo sapiens GN=ILK PE=2 SV=1 (B7Z418)	Integrin-linked protein kinase OS=Homo sapiens GN=ILK PE=2 SV=1	B7Z418,Q13418	Uniprot_human_V1.fasta	44349.1	1	2	2	2	0.000276	0.0512
Cluster of Dolichyl-diphosphooligosaccharide--protein glycosyltransferase subunit 1 OS=Homo sapiens GN=RPN1 PE=1 SV=1 (P04843)	Dolichyl-diphosphooligosaccharide--protein glycosyltransferase subunit 1 OS=Homo sapiens GN=RPN1 PE=1 SV=1	P04843	Uniprot_human_V1.fasta	68571	0.996	3	3	3	0.000414	0.0544
Cluster of Tropomyosin alpha-3 chain OS=Homo sapiens GN=TPM3 PE=3 SV=1 (J3KN67)	Tropomyosin alpha-3 chain OS=Homo sapiens GN=TPM3 PE=3 SV=1	J3KN67,P06753,P06753-2,P06753-3,Q5VU58,Q5VU59,Q5VU66,Q5VU72	Uniprot_human_V1.fasta	28956.3	0.998	2	2	4	0.000552	0.109
Cluster of Ceruloplasmin OS=Homo sapiens GN=CP PE=4 SV=1 (E9PFZ2)	Ceruloplasmin OS=Homo sapiens GN=CP PE=4 SV=1	E9PFZ2,P00450	Uniprot_human_V1.fasta	108823	0.999	3	3	3	0.000414	0.0412
Cluster of Elongation factor 1-delta (Fragment) OS=Homo sapiens GN=EEF1D PE=3 SV=1 (E9PK01)	Elongation factor 1-delta (Fragment) OS=Homo sapiens GN=EEF1D PE=3 SV=1	E9PK01,E9PRY8,P29692,P29692-2	Uniprot_human_V1.fasta	28821.4	1	2	2	2	0.000276	0.126
Cluster of Heat shock protein HSP 90-beta OS=Homo sapiens GN=HSP90AB1 PE=1 SV=4 (P08238)	Heat shock protein HSP 90-beta OS=Homo sapiens GN=HSP90AB1 PE=1 SV=4	P08238	Uniprot_human_V1.fasta	83267.3	0.999	2	2	5	0.00069	0.0608
Cluster of Histone H2A type 1-B/E OS=Homo sapiens GN=HIST1H2AB PE=1 SV=2 (P04908)	Histone H2A type 1-B/E OS=Homo sapiens GN=HIST1H2AB PE=1 SV=2	P04908,Q7L7L0,Q93077	Uniprot_human_V1.fasta	14136.1	1	2	2	5	0.00069	0.208
Cluster of Peptidyl-prolyl cis-trans isomerase A OS=Homo sapiens GN=PPIA PE=1 SV=2 (P62937)	Peptidyl-prolyl cis-trans isomerase A OS=Homo sapiens GN=PPIA PE=1 SV=2	P62937	Uniprot_human_V1.fasta	18012.9	1	5	5	5	0.00069	0.4
Cluster of Actin-related protein 2/3 complex subunit 4 OS=Homo sapiens GN=ARPC4 PE=4 SV=1 (C9JWM7)	Actin-related protein 2/3 complex subunit 4 OS=Homo sapiens GN=ARPC4 PE=4 SV=1	C9JWM7,E7ETI0,F8WCF6,F8WDD7,P59998	Uniprot_human_V1.fasta	21588.4	1	2	2	2	0.000276	0.102
Cluster of Alpha-actinin-4 OS=Homo sapiens GN=ACTN4 PE=1 SV=2 (O43707)	Alpha-actinin-4 OS=Homo sapiens GN=ACTN4 PE=1 SV=2	O43707	Uniprot_human_V1.fasta	104857	1	3	3	3	0.000414	0.0351
Cluster of Cysteine and glycine-rich protein 1 OS=Homo sapiens GN=CSRP1 PE=1 SV=3 (P21291)	Cysteine and glycine-rich protein 1 OS=Homo sapiens GN=CSRP1 PE=1 SV=3	P21291	Uniprot_human_V1.fasta	20567.1	1	3	3	3	0.000414	0.28
Cluster of 60S ribosomal protein L7a OS=Homo sapiens GN=RPL7A PE=1 SV=2 (P62424)	60S ribosomal protein L7a OS=Homo sapiens GN=RPL7A PE=1 SV=2	P62424	Uniprot_human_V1.fasta	29996.3	1	5	5	5	0.00069	0.211
Cluster of Protein disulfide isomerase family A, member 3, isoform CRA_b OS=Homo sapiens GN=PDIA3 PE=3 SV=1 (G5EA52)	Protein disulfide isomerase family A, member 3, isoform CRA_b OS=Homo sapiens GN=PDIA3 PE=3 SV=1	G5EA52,P30101	Uniprot_human_V1.fasta	54965.6	1	9	9	10	0.00138	0.21
Cluster of Elongation factor Tu, mitochondrial OS=Homo sapiens GN=TUFM PE=1 SV=2 (P49411)	Elongation factor Tu, mitochondrial OS=Homo sapiens GN=TUFM PE=1 SV=2	P49411	Uniprot_human_V1.fasta	49542.4	0.996	2	2	2	0.000276	0.073
Cluster of Dolichyl-diphosphooligosaccharide--protein glycosyltransferase 48 kDa subunit OS=Homo sapiens GN=DDOST PE=1 SV=4 (P39656)	Dolichyl-diphosphooligosaccharide--protein glycosyltransferase 48 kDa subunit OS=Homo sapiens GN=DDOST PE=1 SV=4	P39656	Uniprot_human_V1.fasta	50802.5	1	2	2	2	0.000276	0.0395
Cluster of Neuroblast differentiation-associated protein AHNAK OS=Homo sapiens GN=AHNAK PE=1 SV=2 (Q09666)	Neuroblast differentiation-associated protein AHNAK OS=Homo sapiens GN=AHNAK PE=1 SV=2	Q09666	Uniprot_human_V1.fasta	629104	1	7	7	7	0.000966	0.0163
Cluster of 60S ribosomal protein L18 (Fragment) OS=Homo sapiens GN=RPL18 PE=4 SV=1 (F8VUA6)	60S ribosomal protein L18 (Fragment) OS=Homo sapiens GN=RPL18 PE=4 SV=1	F8VUA6,F8VWC5,G3V203,H0YHA7,J3QQ67,Q07020	Uniprot_human_V1.fasta	14529.4	1	2	2	2	0.000276	0.185
Cluster of Myosin-9 OS=Homo sapiens GN=MYH9 PE=1 SV=4 (P35579)	Myosin-11 OS=Homo sapiens GN=MYH11 PE=1 SV=3	P35749,P35749-2,P35749-3,Q3MIV8	Uniprot_human_V1.fasta	227345	1	4	4	6	0.000828	0.0365
Cluster of Transgelin (Fragment) OS=Homo sapiens GN=TAGLN PE=4 SV=1 (H0YCU9)	Transgelin (Fragment) OS=Homo sapiens GN=TAGLN PE=4 SV=1	H0YCU9,Q01995	Uniprot_human_V1.fasta	16844.3	1	4	4	4	0.000552	0.291
Cluster of Aldehyde dehydrogenase, mitochondrial OS=Homo sapiens GN=ALDH2 PE=3 SV=1 (F8VXI5)	Aldehyde dehydrogenase, mitochondrial OS=Homo sapiens GN=ALDH2 PE=3 SV=1	F8VXI5,P05091	Uniprot_human_V1.fasta	48532.2	0.993	1	1	2	0.000276	0.0454
Cluster of 60S ribosomal protein L13 OS=Homo sapiens GN=RPL13 PE=1 SV=4 (P26373)	60S ribosomal protein L13 OS=Homo sapiens GN=RPL13 PE=1 SV=4	P26373	Uniprot_human_V1.fasta	24262.2	1	4	4	5	0.00069	0.171
Cluster of Carbonic anhydrase 1 OS=Homo sapiens GN=CA1 PE=1 SV=2 (P00915)	Carbonic anhydrase 1 OS=Homo sapiens GN=CA1 PE=1 SV=2	P00915	Uniprot_human_V1.fasta	28870.4	1	5	6	6	0.000828	0.268
Cluster of 60S ribosomal protein L10a OS=Homo sapiens GN=RPL10A PE=1 SV=2 (P62906)	60S ribosomal protein L10a OS=Homo sapiens GN=RPL10A PE=1 SV=2	P62906	Uniprot_human_V1.fasta	24832	1	2	2	2	0.000276	0.0968
Cluster of Desmoglein-1 OS=Homo sapiens GN=DSG1 PE=1 SV=2 (Q02413)	Desmoglein-1 OS=Homo sapiens GN=DSG1 PE=1 SV=2	Q02413	Uniprot_human_V1.fasta	113749	1	5	5	5	0.00069	0.0724
Cluster of Actin, cytoplasmic 1 OS=Homo sapiens GN=ACTB PE=1 SV=1 (P60709)	Actin, aortic smooth muscle OS=Homo sapiens GN=ACTA2 PE=1 SV=1	P62736,P63267,P68032	Uniprot_human_V1.fasta	42010.1	1	4	4	17	0.00235	0.3
Cluster of Keratin, type II cytoskeletal 2 epidermal OS=Homo sapiens GN=KRT2 PE=1 SV=2 (P35908)	Keratin, type II cytoskeletal 1b OS=Homo sapiens GN=KRT77 PE=1 SV=3	Q7Z794	Uniprot_human_V1.fasta	61901.9	0.999	2	2	8	0.0011	0.0934
Cluster of Tryptophan--tRNA ligase, cytoplasmic OS=Homo sapiens GN=WARS PE=1 SV=2 (P23381)	Tryptophan--tRNA ligase, cytoplasmic OS=Homo sapiens GN=WARS PE=1 SV=2	P23381,P23381-2	Uniprot_human_V1.fasta	53167.6	0.992	2	2	2	0.000276	0.0425
Cluster of Ubiquitin-like modifier-activating enzyme 1 OS=Homo sapiens GN=UBA1 PE=1 SV=3 (P22314)	Ubiquitin-like modifier-activating enzyme 1 OS=Homo sapiens GN=UBA1 PE=1 SV=3	P22314,Q5JRR6	Uniprot_human_V1.fasta	117850	1	3	3	4	0.000552	0.0435
Cluster of Hemoglobin subunit beta OS=Homo sapiens GN=HBB PE=1 SV=2 (P68871)	Hemoglobin subunit delta OS=Homo sapiens GN=HBD PE=1 SV=2	P02042	Uniprot_human_V1.fasta	16055.2	1	2	2	10	0.00138	0.537
Cluster of Methyltransferase-like protein 7A (Fragment) OS=Homo sapiens GN=METTL7A PE=4 SV=1 (F8VQX6)	Methyltransferase-like protein 7A (Fragment) OS=Homo sapiens GN=METTL7A PE=4 SV=1	F8VQX6,H0YI09,Q9H8H3	Uniprot_human_V1.fasta	20662.6	1	2	2	2	0.000276	0.15
Cluster of Moesin OS=Homo sapiens GN=MSN PE=1 SV=3 (P26038)	Ezrin OS=Homo sapiens GN=EZR PE=4 SV=2	E7EQR4,P15311	Uniprot_human_V1.fasta	65581	0.999	1	1	4	0.000552	0.0578
Cluster of Collagen alpha-2(IV) chain OS=Homo sapiens GN=COL4A2 PE=1 SV=4 (P08572)	Collagen alpha-2(IV) chain OS=Homo sapiens GN=COL4A2 PE=1 SV=4	P08572	Uniprot_human_V1.fasta	167558	1	3	3	3	0.000414	0.0263
Cluster of Filaggrin-2 OS=Homo sapiens GN=FLG2 PE=1 SV=1 (Q5D862)	Filaggrin-2 OS=Homo sapiens GN=FLG2 PE=1 SV=1	Q5D862	Uniprot_human_V1.fasta	248052	1	5	6	6	0.000828	0.0519
Cluster of Olfactomedin-like protein 3 OS=Homo sapiens GN=OLFML3 PE=2 SV=1 (Q9NRN5)	Olfactomedin-like protein 3 OS=Homo sapiens GN=OLFML3 PE=2 SV=1	Q9NRN5,Q9NRN5-2,Q9NRN5-3	Uniprot_human_V1.fasta	46011.2	1	2	2	2	0.000276	0.0296
Cluster of Keratin, type I cytoskeletal 10 OS=Homo sapiens GN=KRT10 PE=1 SV=6 (P13645)	Keratin, type I cytoskeletal 14 OS=Homo sapiens GN=KRT14 PE=1 SV=4	P02533	Uniprot_human_V1.fasta	51562.5	1	10	10	22	0.00304	0.383
Cluster of Complement component C4B (Childo blood group) OS=Homo sapiens GN=C4B-1 PE=4 SV=1 (A2BHY4)	Complement component C4B (Childo blood group) OS=Homo sapiens GN=C4B-1 PE=4 SV=1	A2BHY4,A6H8M8,B0UZ83,B0V2C8,F5GXS0,F8VNV9,F8VSI2,F8VW91,F8VX64,F8VZD8,P0C0L4,P0C0L5,Q5JNX2,Q6U2E9	Uniprot_human_V1.fasta	192799	1	11	11	12	0.00166	0.0751
Cluster of Moesin OS=Homo sapiens GN=MSN PE=1 SV=3 (P26038)	Moesin OS=Homo sapiens GN=MSN PE=1 SV=3	P26038	Uniprot_human_V1.fasta	67821.8	1	2	2	5	0.00069	0.0624
Cluster of Valine--tRNA ligase OS=Homo sapiens GN=VARS PE=3 SV=1 (B0V043)	Valine--tRNA ligase OS=Homo sapiens GN=VARS PE=3 SV=1	B0V043,H0Y4A6,P26640	Uniprot_human_V1.fasta	140468	0.998	2	2	2	0.000276	0.019
Cluster of L-lactate dehydrogenase (Fragment) OS=Homo sapiens GN=LDHB PE=3 SV=1 (A8MW50)	L-lactate dehydrogenase (Fragment) OS=Homo sapiens GN=LDHB PE=3 SV=1	A8MW50,C9J7H8,F5H793,P07195	Uniprot_human_V1.fasta	25217.6	0.999	2	2	2	0.000276	0.0991
Cluster of Junction plakoglobin OS=Homo sapiens GN=JUP PE=1 SV=3 (P14923)	Junction plakoglobin OS=Homo sapiens GN=JUP PE=1 SV=3	P14923	Uniprot_human_V1.fasta	81745.9	1	7	7	7	0.000966	0.094
Cluster of 40S ribosomal protein S18 OS=Homo sapiens GN=RPS18 PE=1 SV=3 (P62269)	40S ribosomal protein S18 OS=Homo sapiens GN=RPS18 PE=1 SV=3	P62269	Uniprot_human_V1.fasta	17719.3	1	3	3	3	0.000414	0.171
Cluster of Galectin-3 OS=Homo sapiens GN=LGALS3 PE=4 SV=1 (G3V3R6)	Galectin-3 OS=Homo sapiens GN=LGALS3 PE=4 SV=1	G3V3R6,P17931	Uniprot_human_V1.fasta	24086.3	1	3	3	3	0.000414	0.167
Cluster of Protein ERGIC-53 OS=Homo sapiens GN=LMAN1 PE=1 SV=2 (P49257)	Protein ERGIC-53 OS=Homo sapiens GN=LMAN1 PE=1 SV=2	P49257	Uniprot_human_V1.fasta	57549.2	1	3	3	3	0.000414	0.0706
Cluster of Selenium-binding protein 1 OS=Homo sapiens GN=SELENBP1 PE=1 SV=2 (Q13228)	Selenium-binding protein 1 OS=Homo sapiens GN=SELENBP1 PE=1 SV=2	Q13228	Uniprot_human_V1.fasta	52392	1	5	5	5	0.00069	0.146
Cluster of Vinculin OS=Homo sapiens GN=VCL PE=1 SV=4 (P18206)	Vinculin OS=Homo sapiens GN=VCL PE=1 SV=4	P18206,P18206-2	Uniprot_human_V1.fasta	123801	1	7	7	7	0.000966	0.0802
Cluster of Heterogeneous nuclear ribonucleoprotein U OS=Homo sapiens GN=HNRNPU PE=1 SV=6 (Q00839)	Heterogeneous nuclear ribonucleoprotein U OS=Homo sapiens GN=HNRNPU PE=1 SV=6	Q00839,Q00839-2	Uniprot_human_V1.fasta	90585.2	1	2	2	2	0.000276	0.0327
Cluster of Heat shock 70 kDa protein 1A/1B OS=Homo sapiens GN=HSPA1A PE=1 SV=5 (P08107)	Heat shock cognate 71 kDa protein OS=Homo sapiens GN=HSPA8 PE=3 SV=1	E9PKE3,P11142,P11142-2	Uniprot_human_V1.fasta	68807.7	1	4	4	6	0.000828	0.128
Cluster of Proteasome subunit beta type-3 OS=Homo sapiens GN=PSMB3 PE=3 SV=1 (J3KRR2)	Proteasome subunit beta type-3 OS=Homo sapiens GN=PSMB3 PE=3 SV=1	J3KRR2,J3KSM3,J3QKR3,P49720	Uniprot_human_V1.fasta	12610.8	0.988	2	2	2	0.000276	0.188
Cluster of Myosin-9 OS=Homo sapiens GN=MYH9 PE=1 SV=4 (P35579)	Myosin-9 OS=Homo sapiens GN=MYH9 PE=1 SV=4	P35579	Uniprot_human_V1.fasta	226538	1	14	14	16	0.00221	0.0755
Cluster of Ig lambda-2 chain C regions OS=Homo sapiens GN=IGLC2 PE=1 SV=1 (P0CG05)	Ig lambda-2 chain C regions OS=Homo sapiens GN=IGLC2 PE=1 SV=1	P0CG05	Uniprot_human_V1.fasta	11293.2	1	6	9	15	0.00207	0.632
Cluster of Haptoglobin OS=Homo sapiens GN=HP PE=1 SV=1 (P00738)	Haptoglobin OS=Homo sapiens GN=HP PE=1 SV=1	P00738	Uniprot_human_V1.fasta	45204.9	1	4	4	4	0.000552	0.126
Cluster of TXNDC5 protein OS=Homo sapiens GN=TXNDC5 PE=2 SV=1 (Q86UY0)	TXNDC5 protein OS=Homo sapiens GN=TXNDC5 PE=2 SV=1	Q86UY0,Q8NBS9	Uniprot_human_V1.fasta	40369.2	1	7	7	8	0.0011	0.236
Cluster of Ras-related C3 botulinum toxin substrate 2 OS=Homo sapiens GN=RAC2 PE=3 SV=1 (B1AH77)	Ras-related C3 botulinum toxin substrate 2 OS=Homo sapiens GN=RAC2 PE=3 SV=1	B1AH77,B1AH80,P15153	Uniprot_human_V1.fasta	16776	0.999	2	2	2	0.000276	0.149
Cluster of Histone H2B OS=Homo sapiens GN=HIST2H2BF PE=2 SV=1 (B4DR52)	Histone H2B OS=Homo sapiens GN=HIST2H2BF PE=2 SV=1	B4DR52,O60814,P57053,P58876,P62807,Q5QNW6,Q5QNW6-2,Q93079,Q99877,Q99879,Q99880	Uniprot_human_V1.fasta	18041.3	1	4	4	5	0.00069	0.181
Cluster of Heterogeneous nuclear ribonucleoproteins C1/C2 OS=Homo sapiens GN=HNRNPC PE=2 SV=1 (B4DY08)	Heterogeneous nuclear ribonucleoproteins C1/C2 OS=Homo sapiens GN=HNRNPC PE=2 SV=1	B4DY08,G3V2Q1,G3V4C1,G3V4W0,G3V555,G3V575,G3V576,P07910,P07910-2,P07910-4	Uniprot_human_V1.fasta	31971.9	1	5	5	5	0.00069	0.17
Cluster of Glucosidase 2 subunit beta OS=Homo sapiens GN=PRKCSH PE=1 SV=2 (P14314)	Glucosidase 2 subunit beta OS=Homo sapiens GN=PRKCSH PE=1 SV=2	P14314,P14314-2	Uniprot_human_V1.fasta	59425.8	0.993	3	3	3	0.000414	0.0568
Cluster of Vitamin D-binding protein OS=Homo sapiens GN=GC PE=4 SV=1 (D6RAK8)	Vitamin D-binding protein OS=Homo sapiens GN=GC PE=4 SV=1	D6RAK8,D6RF35,P02774,P02774-2	Uniprot_human_V1.fasta	55077.9	1	3	3	3	0.000414	0.0365
Cluster of Apolipoprotein B-100 OS=Homo sapiens GN=APOB PE=1 SV=2 (P04114)	Apolipoprotein B-100 OS=Homo sapiens GN=APOB PE=1 SV=2	P04114	Uniprot_human_V1.fasta	515615	0.999	2	2	2	0.000276	0.00416
Cluster of Collagen alpha-1(XII) chain OS=Homo sapiens GN=COL12A1 PE=4 SV=1 (D6RGG3)	Collagen alpha-1(XII) chain OS=Homo sapiens GN=COL12A1 PE=4 SV=1	D6RGG3,Q99715,Q99715-2,Q99715-4	Uniprot_human_V1.fasta	333200	1	4	4	4	0.000552	0.015
Cluster of Nucleoside diphosphate kinase A OS=Homo sapiens GN=NME1 PE=3 SV=1 (E7ERL0)	Nucleoside diphosphate kinase A OS=Homo sapiens GN=NME1 PE=3 SV=1	E7ERL0,J3KPD9,P15531,P15531-2,P22392,P22392-2,Q32Q12	Uniprot_human_V1.fasta	15260.9	1	2	2	2	0.000276	0.209
Cluster of 40S ribosomal protein S4, X isoform OS=Homo sapiens GN=RPS4X PE=1 SV=2 (P62701)	40S ribosomal protein S4, X isoform OS=Homo sapiens GN=RPS4X PE=1 SV=2	P62701	Uniprot_human_V1.fasta	29599.3	1	4	4	4	0.000552	0.152
Cluster of Translocon-associated protein subunit delta OS=Homo sapiens GN=SSR4 PE=1 SV=1 (P51571)	Translocon-associated protein subunit delta OS=Homo sapiens GN=SSR4 PE=1 SV=1	P51571	Uniprot_human_V1.fasta	18998.8	1	2	2	2	0.000276	0.139
Cluster of 40S ribosomal protein S8 OS=Homo sapiens GN=RPS8 PE=1 SV=2 (P62241)	40S ribosomal protein S8 OS=Homo sapiens GN=RPS8 PE=1 SV=2	P62241,Q5JR95	Uniprot_human_V1.fasta	24206.4	1	2	2	2	0.000276	0.13
Cluster of Transitional endoplasmic reticulum ATPase OS=Homo sapiens GN=VCP PE=1 SV=4 (P55072)	Transitional endoplasmic reticulum ATPase OS=Homo sapiens GN=VCP PE=1 SV=4	P55072	Uniprot_human_V1.fasta	89324.8	1	7	8	8	0.0011	0.1
Cluster of Laminin subunit beta-2 OS=Homo sapiens GN=LAMB2 PE=1 SV=2 (P55268)	Laminin subunit beta-2 OS=Homo sapiens GN=LAMB2 PE=1 SV=2	P55268	Uniprot_human_V1.fasta	195976	1	3	3	3	0.000414	0.0239
Cluster of Collagen alpha-3(VI) chain OS=Homo sapiens GN=COL6A3 PE=4 SV=1 (E7ENL6)	Collagen alpha-3(VI) chain OS=Homo sapiens GN=COL6A3 PE=4 SV=1	E7ENL6,E9PCV6,E9PFQ6,P12111,P12111-2	Uniprot_human_V1.fasta	322186	1	46	48	48	0.00663	0.165
Cluster of CD5 antigen-like OS=Homo sapiens GN=CD5L PE=1 SV=1 (O43866)	CD5 antigen-like OS=Homo sapiens GN=CD5L PE=1 SV=1	O43866	Uniprot_human_V1.fasta	38085.9	0.961	2	2	2	0.000276	0.0519
Cluster of Neutral alpha-glucosidase AB OS=Homo sapiens GN=GANAB PE=4 SV=1 (F5H6X6)	Neutral alpha-glucosidase AB OS=Homo sapiens GN=GANAB PE=4 SV=1	F5H6X6,Q14697,Q14697-2	Uniprot_human_V1.fasta	96218.1	1	3	3	3	0.000414	0.046
Cluster of Collagen alpha-1(VI) chain OS=Homo sapiens GN=COL6A1 PE=1 SV=3 (P12109)	Collagen alpha-1(VI) chain OS=Homo sapiens GN=COL6A1 PE=1 SV=3	P12109	Uniprot_human_V1.fasta	108531	1	10	10	10	0.00138	0.104
Cluster of Alpha-enolase OS=Homo sapiens GN=ENO1 PE=1 SV=2 (P06733)	Alpha-enolase OS=Homo sapiens GN=ENO1 PE=1 SV=2	P06733	Uniprot_human_V1.fasta	47170.2	1	9	9	9	0.00124	0.29
Cluster of Coronin OS=Homo sapiens GN=CORO1C PE=2 SV=1 (A7MAP0)	Coronin OS=Homo sapiens GN=CORO1C PE=2 SV=1	A7MAP0,A7MAP1,B4E3S0,Q9ULV4	Uniprot_human_V1.fasta	54068.3	0.998	2	2	2	0.000276	0.05
Cluster of Heterogeneous nuclear ribonucleoprotein R OS=Homo sapiens GN=HNRNPR PE=1 SV=1 (O43390)	Heterogeneous nuclear ribonucleoprotein R OS=Homo sapiens GN=HNRNPR PE=1 SV=1	O43390,O43390-2,O60506,O60506-2,O60506-3,O60506-4	Uniprot_human_V1.fasta	70943.9	1	2	2	2	0.000276	0.0316
Cluster of Cytosolic non-specific dipeptidase OS=Homo sapiens GN=CNDP2 PE=1 SV=2 (Q96KP4)	Cytosolic non-specific dipeptidase OS=Homo sapiens GN=CNDP2 PE=1 SV=2	Q96KP4	Uniprot_human_V1.fasta	52879.7	1	2	2	2	0.000276	0.0611
Cluster of Elongation factor 1-alpha 1 OS=Homo sapiens GN=EEF1A1 PE=1 SV=1 (P68104)	Elongation factor 1-alpha 1 OS=Homo sapiens GN=EEF1A1 PE=1 SV=1	P68104,Q5VTE0	Uniprot_human_V1.fasta	50141.2	1	6	6	7	0.000966	0.208
Cluster of Coronin OS=Homo sapiens GN=CORO1A PE=3 SV=1 (H3BRY3)	Coronin OS=Homo sapiens GN=CORO1A PE=3 SV=1	H3BRY3,P31146	Uniprot_human_V1.fasta	43353.1	0.879	2	2	2	0.000276	0.072
Cluster of L-lactate dehydrogenase OS=Homo sapiens GN=LDHA PE=3 SV=1 (F5H308)	L-lactate dehydrogenase OS=Homo sapiens GN=LDHA PE=3 SV=1	F5H308,P00338,P00338-3	Uniprot_human_V1.fasta	33656.7	0.998	3	3	3	0.000414	0.0789
Cluster of Heterogeneous nuclear ribonucleoprotein K OS=Homo sapiens GN=HNRNPK PE=1 SV=1 (P61978)	Heterogeneous nuclear ribonucleoprotein K OS=Homo sapiens GN=HNRNPK PE=1 SV=1	P61978,P61978-2,P61978-3,Q5T6W5	Uniprot_human_V1.fasta	50978.5	1	2	2	2	0.000276	0.0734
Cluster of Ig kappa chain V-III region SIE OS=Homo sapiens PE=1 SV=1 (P01620)	Ig kappa chain V-III region SIE OS=Homo sapiens PE=1 SV=1	P01620,P01623,P18135,P18136	Uniprot_human_V1.fasta	11775.4	1	2	2	2	0.000276	0.229
Cluster of Myosin light polypeptide 6 OS=Homo sapiens GN=MYL6 PE=2 SV=1 (B7Z6Z4)	Myosin light polypeptide 6 OS=Homo sapiens GN=MYL6 PE=2 SV=1	B7Z6Z4,F8VPF3,F8VZV5,F8W1R7,G3V1V0,G8JLA2,J3KND3,P60660,P60660-2	Uniprot_human_V1.fasta	26706.4	1	3	3	4	0.000552	0.168
Cluster of Galectin-7 OS=Homo sapiens GN=LGALS7 PE=1 SV=2 (P47929)	Galectin-7 OS=Homo sapiens GN=LGALS7 PE=1 SV=2	P47929	Uniprot_human_V1.fasta	15074.7	0.999	3	3	3	0.000414	0.287
Cluster of Keratin, type I cytoskeletal 9 OS=Homo sapiens GN=KRT9 PE=1 SV=3 (P35527)	Keratin, type I cytoskeletal 9 OS=Homo sapiens GN=KRT9 PE=1 SV=3	P35527	Uniprot_human_V1.fasta	62065.9	1	19	20	26	0.00359	0.551
Cluster of Talin 1 OS=Homo sapiens GN=TLN1 PE=2 SV=1 (Q5TCU6)	Talin 1 OS=Homo sapiens GN=TLN1 PE=2 SV=1	Q5TCU6,Q9Y490	Uniprot_human_V1.fasta	258080	1	5	5	5	0.00069	0.0251
Cluster of 60S ribosomal protein L7 OS=Homo sapiens GN=RPL7 PE=3 SV=1 (A8MUD9)	60S ribosomal protein L7 OS=Homo sapiens GN=RPL7 PE=3 SV=1	A8MUD9,P18124	Uniprot_human_V1.fasta	24434.7	1	5	5	5	0.00069	0.188
Cluster of Dihydropyrimidinase-related protein 2 OS=Homo sapiens GN=DPYSL2 PE=2 SV=1 (B4DR31)	Dihydropyrimidinase-related protein 2 OS=Homo sapiens GN=DPYSL2 PE=2 SV=1	B4DR31,Q16555	Uniprot_human_V1.fasta	58162.9	1	4	4	6	0.000828	0.157
Cluster of D-3-phosphoglycerate dehydrogenase OS=Homo sapiens GN=PHGDH PE=1 SV=4 (O43175)	D-3-phosphoglycerate dehydrogenase OS=Homo sapiens GN=PHGDH PE=1 SV=4	O43175,Q5SZU1	Uniprot_human_V1.fasta	56650.6	0.974	2	2	2	0.000276	0.0375
Cluster of Macrophage migration inhibitory factor OS=Homo sapiens GN=MIF PE=1 SV=4 (P14174)	Macrophage migration inhibitory factor OS=Homo sapiens GN=MIF PE=1 SV=4	P14174	Uniprot_human_V1.fasta	12476.5	1	2	2	2	0.000276	0.174
Cluster of Very long-chain-specific acyl-CoA dehydrogenase, mitochondrial OS=Homo sapiens GN=ACADVL PE=3 SV=1 (F5H2A9)	Very long-chain-specific acyl-CoA dehydrogenase, mitochondrial OS=Homo sapiens GN=ACADVL PE=3 SV=1	F5H2A9,G3V1M7,P49748,P49748-2	Uniprot_human_V1.fasta	72928.6	0.999	2	2	2	0.000276	0.0457
Cluster of Coatomer subunit alpha OS=Homo sapiens GN=COPA PE=1 SV=2 (P53621)	Coatomer subunit alpha OS=Homo sapiens GN=COPA PE=1 SV=2	P53621,P53621-2	Uniprot_human_V1.fasta	138349	1	4	4	4	0.000552	0.0359
Cluster of Plectin OS=Homo sapiens GN=PLEC PE=1 SV=3 (Q15149)	Plectin OS=Homo sapiens GN=PLEC PE=1 SV=3	Q15149,Q15149-2,Q15149-3,Q15149-4,Q15149-5,Q15149-6,Q15149-7,Q15149-8,Q15149-9	Uniprot_human_V1.fasta	531784	1	3	3	3	0.000414	0.0109
Cluster of Unconventional myosin-Ic OS=Homo sapiens GN=MYO1C PE=4 SV=1 (F5H6E2)	Unconventional myosin-Ic OS=Homo sapiens GN=MYO1C PE=4 SV=1	F5H6E2,O00159,O00159-2,O00159-3	Uniprot_human_V1.fasta	118998	0.984	2	2	2	0.000276	0.0173
Cluster of Glutathione S-transferase P OS=Homo sapiens GN=GSTP1 PE=1 SV=2 (P09211)	Glutathione S-transferase P OS=Homo sapiens GN=GSTP1 PE=1 SV=2	P09211	Uniprot_human_V1.fasta	23356.7	1	3	3	3	0.000414	0.214
Cluster of Phosphoglycerate kinase 1 OS=Homo sapiens GN=PGK1 PE=2 SV=1 (B7Z7A9)	Phosphoglycerate kinase 1 OS=Homo sapiens GN=PGK1 PE=2 SV=1	B7Z7A9,P00558	Uniprot_human_V1.fasta	41429.5	1	7	7	8	0.0011	0.254
Cluster of Keratin, type II cytoskeletal 2 epidermal OS=Homo sapiens GN=KRT2 PE=1 SV=2 (P35908)	Keratin, type II cytoskeletal 6C OS=Homo sapiens GN=KRT6C PE=1 SV=3	P48668	Uniprot_human_V1.fasta	60026.7	1	5	5	17	0.00235	0.238
Cluster of 60 kDa heat shock protein, mitochondrial OS=Homo sapiens GN=HSPD1 PE=1 SV=2 (P10809)	60 kDa heat shock protein, mitochondrial OS=Homo sapiens GN=HSPD1 PE=1 SV=2	P10809	Uniprot_human_V1.fasta	61055.7	1	3	3	4	0.000552	0.103

## Sheet: training-6
Cluster	Protein name	Protein accession numbers	Database sources	Protein molecular weight (Da)	Protein identification probability	Exclusive unique peptide count	Exclusive unique spectrum count	Total spectrum count	Percentage of total spectra	Percentage sequence coverage
Cluster of Sushi repeat-containing protein SRPX OS=Homo sapiens GN=SRPX PE=4 SV=1 (G3V1L0)	Sushi repeat-containing protein SRPX OS=Homo sapiens GN=SRPX PE=4 SV=1	G3V1L0,P78539,P78539-2	Uniprot_human_V1.fasta	49382.6	1	5	5	5	0.000695	0.133
Cluster of Phospholipase A2, membrane associated OS=Homo sapiens GN=PLA2G2A PE=1 SV=2 (P14555)	Phospholipase A2, membrane associated OS=Homo sapiens GN=PLA2G2A PE=1 SV=2	P14555	Uniprot_human_V1.fasta	16083	1	3	4	4	0.000556	0.306
Cluster of Hornerin OS=Homo sapiens GN=HRNR PE=1 SV=2 (Q86YZ3)	Hornerin OS=Homo sapiens GN=HRNR PE=1 SV=2	Q86YZ3	Uniprot_human_V1.fasta	282373	1	2	2	2	0.000278	0.0147
Cluster of Complement C3 OS=Homo sapiens GN=C3 PE=1 SV=2 (P01024)	Complement C3 OS=Homo sapiens GN=C3 PE=1 SV=2	P01024	Uniprot_human_V1.fasta	187149	1	8	8	8	0.00111	0.0577
Cluster of Alpha-2-macroglobulin OS=Homo sapiens GN=A2M PE=1 SV=3 (P01023)	Alpha-2-macroglobulin OS=Homo sapiens GN=A2M PE=1 SV=3	P01023	Uniprot_human_V1.fasta	163290	1	5	5	5	0.000695	0.0387
Cluster of Desmoglein-1 OS=Homo sapiens GN=DSG1 PE=1 SV=2 (Q02413)	Desmoglein-1 OS=Homo sapiens GN=DSG1 PE=1 SV=2	Q02413	Uniprot_human_V1.fasta	113749	1	5	5	5	0.000695	0.062
Cluster of Metalloproteinase inhibitor 3 OS=Homo sapiens GN=TIMP3 PE=1 SV=2 (P35625)	Metalloproteinase inhibitor 3 OS=Homo sapiens GN=TIMP3 PE=1 SV=2	P35625	Uniprot_human_V1.fasta	24145.5	1	3	3	4	0.000556	0.156
Cluster of Trypstatin OS=Homo sapiens GN=AMBP PE=2 SV=1 (B7Z8R6)	Trypstatin OS=Homo sapiens GN=AMBP PE=2 SV=1	B7Z8R6,P02760	Uniprot_human_V1.fasta	29778.2	1	4	4	5	0.000695	0.248
Cluster of Hemoglobin subunit beta OS=Homo sapiens GN=HBB PE=1 SV=2 (P68871)	Hemoglobin subunit beta OS=Homo sapiens GN=HBB PE=1 SV=2	P68871	Uniprot_human_V1.fasta	15998	1	3	3	13	0.00181	0.551
Cluster of WNT1-inducible-signaling pathway protein 2 OS=Homo sapiens GN=WISP2 PE=1 SV=1 (O76076)	WNT1-inducible-signaling pathway protein 2 OS=Homo sapiens GN=WISP2 PE=1 SV=1	O76076	Uniprot_human_V1.fasta	26824	1	3	3	3	0.000417	0.176
Cluster of Keratin, type II cytoskeletal 4 OS=Homo sapiens GN=KRT4 PE=3 SV=1 (F5H8K9)	Keratin, type II cytoskeletal 80 OS=Homo sapiens GN=KRT80 PE=1 SV=2	Q6KB66,Q6KB66-2,Q6KB66-3	Uniprot_human_V1.fasta	50525.7	0.43	1	1	6	0.000834	0.0442
Cluster of Tubulin beta-4B chain OS=Homo sapiens GN=TUBB4B PE=1 SV=1 (P68371)	Tubulin beta-4B chain OS=Homo sapiens GN=TUBB4B PE=1 SV=1	P68371	Uniprot_human_V1.fasta	49830.7	1	4	4	4	0.000556	0.0966
Cluster of Fibulin-2 OS=Homo sapiens GN=FBLN2 PE=4 SV=1 (F5H1F3)	Fibulin-2 OS=Homo sapiens GN=FBLN2 PE=4 SV=1	F5H1F3,P98095,P98095-2	Uniprot_human_V1.fasta	129452	1	5	5	5	0.000695	0.0512
Cluster of EMILIN-1 OS=Homo sapiens GN=EMILIN1 PE=1 SV=2 (Q9Y6C2)	EMILIN-1 OS=Homo sapiens GN=EMILIN1 PE=1 SV=2	Q9Y6C2	Uniprot_human_V1.fasta	106667	1	2	2	2	0.000278	0.0197
Cluster of Periostin OS=Homo sapiens GN=POSTN PE=4 SV=1 (B1ALD8)	Periostin OS=Homo sapiens GN=POSTN PE=4 SV=1	B1ALD8,Q15063-3	Uniprot_human_V1.fasta	90428.4	1	7	7	7	0.000973	0.112
Cluster of Complement C1q subcomponent subunit B OS=Homo sapiens GN=C1QB PE=4 SV=1 (D6R934)	Complement C1q subcomponent subunit B OS=Homo sapiens GN=C1QB PE=4 SV=1	D6R934,D6RA08,P02746	Uniprot_human_V1.fasta	26460.4	0.986	2	2	2	0.000278	0.0637
Cluster of Serum amyloid P-component OS=Homo sapiens GN=APCS PE=1 SV=2 (P02743)	Serum amyloid P-component OS=Homo sapiens GN=APCS PE=1 SV=2	P02743	Uniprot_human_V1.fasta	25387.7	1	5	5	5	0.000695	0.188
Cluster of Slit homolog 3 protein OS=Homo sapiens GN=SLIT3 PE=2 SV=3 (O75094)	Slit homolog 3 protein OS=Homo sapiens GN=SLIT3 PE=2 SV=3	O75094,O75094-2	Uniprot_human_V1.fasta	167714	1	6	6	6	0.000834	0.0466
Cluster of Glyceraldehyde-3-phosphate dehydrogenase OS=Homo sapiens GN=GAPDH PE=3 SV=1 (E7EUT4)	Glyceraldehyde-3-phosphate dehydrogenase OS=Homo sapiens GN=GAPDH PE=3 SV=1	E7EUT4,P04406	Uniprot_human_V1.fasta	31548	1	5	5	5	0.000695	0.184
Cluster of Prolargin OS=Homo sapiens GN=PRELP PE=1 SV=1 (P51888)	Prolargin OS=Homo sapiens GN=PRELP PE=1 SV=1	P51888	Uniprot_human_V1.fasta	43812.4	1	8	9	11	0.00153	0.238
Cluster of Collagen alpha-2(I) chain OS=Homo sapiens GN=COL1A2 PE=1 SV=7 (P08123)	Collagen alpha-2(I) chain OS=Homo sapiens GN=COL1A2 PE=1 SV=7	P08123	Uniprot_human_V1.fasta	129315	1	4	5	6	0.000834	0.0337
Cluster of Heat shock protein beta-1 OS=Homo sapiens GN=HSPB1 PE=1 SV=2 (P04792)	Heat shock protein beta-1 OS=Homo sapiens GN=HSPB1 PE=1 SV=2	P04792	Uniprot_human_V1.fasta	22782.6	0.999	2	2	2	0.000278	0.132
Cluster of Ig alpha-1 chain C region OS=Homo sapiens GN=IGHA1 PE=1 SV=2 (P01876)	Ig alpha-1 chain C region OS=Homo sapiens GN=IGHA1 PE=1 SV=2	P01876	Uniprot_human_V1.fasta	37653.8	1	7	7	7	0.000973	0.323
Cluster of Tubulin alpha-1C chain OS=Homo sapiens GN=TUBA1C PE=3 SV=1 (F5H5D3)	Tubulin alpha-1C chain OS=Homo sapiens GN=TUBA1C PE=3 SV=1	F5H5D3,G3V1U9,P68363,Q71U36,Q9BQE3	Uniprot_human_V1.fasta	57730.6	1	4	4	4	0.000556	0.114
Cluster of Fibrinogen gamma chain OS=Homo sapiens GN=FGG PE=4 SV=1 (C9JC84)	Fibrinogen gamma chain OS=Homo sapiens GN=FGG PE=4 SV=1	C9JC84,C9JEU5,P02679,P02679-2	Uniprot_human_V1.fasta	52339.2	1	5	5	6	0.000834	0.106
Cluster of Keratin, type II cytoskeletal 2 epidermal OS=Homo sapiens GN=KRT2 PE=1 SV=2 (P35908)	Keratin, type II cytoskeletal 5 OS=Homo sapiens GN=KRT5 PE=1 SV=3	P13647	Uniprot_human_V1.fasta	62379.6	1	11	11	23	0.0032	0.302
Cluster of Keratin, type I cytoskeletal 10 OS=Homo sapiens GN=KRT10 PE=1 SV=6 (P13645)	Keratin, type I cytoskeletal 10 OS=Homo sapiens GN=KRT10 PE=1 SV=6	P13645	Uniprot_human_V1.fasta	58828.8	1	20	21	35	0.00486	0.409
Cluster of Fibrinogen beta chain OS=Homo sapiens GN=FGB PE=1 SV=2 (P02675)	Fibrinogen beta chain OS=Homo sapiens GN=FGB PE=1 SV=2	P02675	Uniprot_human_V1.fasta	55928.6	1	6	6	6	0.000834	0.165
Cluster of Complement factor H OS=Homo sapiens GN=CFH PE=1 SV=4 (P08603)	Complement factor H OS=Homo sapiens GN=CFH PE=1 SV=4	P08603	Uniprot_human_V1.fasta	139096	0.981	4	4	5	0.000695	0.0479
Cluster of Actin, cytoplasmic 1 OS=Homo sapiens GN=ACTB PE=1 SV=1 (P60709)	Actin, cytoplasmic 1 OS=Homo sapiens GN=ACTB PE=1 SV=1	P60709,P63261	Uniprot_human_V1.fasta	41737.8	1	7	7	8	0.00111	0.267
Cluster of Keratin, type I cytoskeletal 16 OS=Homo sapiens GN=KRT16 PE=1 SV=4 (P08779)	Keratin, type I cytoskeletal 17 OS=Homo sapiens GN=KRT17 PE=1 SV=2	Q04695	Uniprot_human_V1.fasta	48106.7	0.923	3	3	14	0.00195	0.234
Cluster of Peroxiredoxin-2 OS=Homo sapiens GN=PRDX2 PE=1 SV=5 (P32119)	Peroxiredoxin-2 OS=Homo sapiens GN=PRDX2 PE=1 SV=5	P32119	Uniprot_human_V1.fasta	21892.4	0.997	2	2	3	0.000417	0.141
Cluster of Keratin, type I cytoskeletal 9 OS=Homo sapiens GN=KRT9 PE=1 SV=3 (P35527)	Keratin, type I cytoskeletal 9 OS=Homo sapiens GN=KRT9 PE=1 SV=3	P35527	Uniprot_human_V1.fasta	62065.9	1	21	23	30	0.00417	0.546
Cluster of Ig gamma-1 chain C region OS=Homo sapiens GN=IGHG1 PE=1 SV=1 (P01857)	Ig gamma-1 chain C region OS=Homo sapiens GN=IGHG1 PE=1 SV=1	P01857	Uniprot_human_V1.fasta	36105	1	4	4	9	0.00125	0.203
Cluster of Serine protease HTRA1 OS=Homo sapiens GN=HTRA1 PE=1 SV=1 (Q92743)	Serine protease HTRA1 OS=Homo sapiens GN=HTRA1 PE=1 SV=1	Q92743	Uniprot_human_V1.fasta	51287.3	1	7	7	7	0.000973	0.183
Cluster of Fibulin-1 OS=Homo sapiens GN=FBLN1 PE=4 SV=1 (F8W7M9)	Fibulin-1 OS=Homo sapiens GN=FBLN1 PE=4 SV=1	F8W7M9,P23142,P23142-3	Uniprot_human_V1.fasta	77197.8	1	1	1	5	0.000695	0.0654
Cluster of Histone H2B OS=Homo sapiens GN=HIST2H2BF PE=2 SV=1 (B4DR52)	Histone H2B OS=Homo sapiens GN=HIST2H2BF PE=2 SV=1	B4DR52,O60814,P57053,P58876,P62807,Q5QNW6,Q5QNW6-2,Q93079,Q99877,Q99879,Q99880	Uniprot_human_V1.fasta	13890.6	0.996	2	2	3	0.000417	0.108
Cluster of Keratin, type II cytoskeletal 4 OS=Homo sapiens GN=KRT4 PE=3 SV=1 (F5H8K9)	Keratin, type II cytoskeletal 4 OS=Homo sapiens GN=KRT4 PE=3 SV=1	F5H8K9,F8VS64,P19013	Uniprot_human_V1.fasta	53966.3	0.54	2	2	8	0.00111	0.072
Cluster of Junction plakoglobin OS=Homo sapiens GN=JUP PE=1 SV=3 (P14923)	Junction plakoglobin OS=Homo sapiens GN=JUP PE=1 SV=3	P14923	Uniprot_human_V1.fasta	81745.9	0.999	5	5	5	0.000695	0.0644
Cluster of Serum albumin OS=Homo sapiens GN=ALB PE=1 SV=2 (P02768)	Serum albumin OS=Homo sapiens GN=ALB PE=1 SV=2	P02768	Uniprot_human_V1.fasta	69366.9	1	24	24	26	0.00361	0.406
Cluster of Annexin (Fragment) OS=Homo sapiens GN=ANXA2 PE=3 SV=1 (H0YM50)	Annexin (Fragment) OS=Homo sapiens GN=ANXA2 PE=3 SV=1	H0YM50,H0YMD0,H0YMU9,H0YN42,P07355,P07355-2	Uniprot_human_V1.fasta	28372.5	0.999	3	3	3	0.000417	0.0968
Cluster of Coiled-coil domain-containing protein 80 OS=Homo sapiens GN=CCDC80 PE=1 SV=1 (Q76M96)	Coiled-coil domain-containing protein 80 OS=Homo sapiens GN=CCDC80 PE=1 SV=1	Q76M96,Q76M96-2	Uniprot_human_V1.fasta	108176	1	5	5	5	0.000695	0.0632
Cluster of Peroxiredoxin-2 OS=Homo sapiens GN=PRDX2 PE=1 SV=5 (P32119)	Peroxiredoxin-1 OS=Homo sapiens GN=PRDX1 PE=1 SV=1	Q06830	Uniprot_human_V1.fasta	22110.9	0.896	1	1	2	0.000278	0.106
Cluster of Lysozyme C OS=Homo sapiens GN=LYZ PE=3 SV=1 (F8VV32)	Lysozyme C OS=Homo sapiens GN=LYZ PE=3 SV=1	F8VV32,P61626	Uniprot_human_V1.fasta	11488.5	1	2	2	2	0.000278	0.183
Cluster of Collagen alpha-2(IV) chain OS=Homo sapiens GN=COL4A2 PE=1 SV=4 (P08572)	Collagen alpha-2(IV) chain OS=Homo sapiens GN=COL4A2 PE=1 SV=4	P08572	Uniprot_human_V1.fasta	167558	0.951	2	2	2	0.000278	0.0181
Cluster of Mimecan OS=Homo sapiens GN=OGN PE=1 SV=1 (P20774)	Mimecan OS=Homo sapiens GN=OGN PE=1 SV=1	P20774	Uniprot_human_V1.fasta	33925	1	5	5	5	0.000695	0.171
Cluster of Keratin, type II cytoskeletal 1 OS=Homo sapiens GN=KRT1 PE=1 SV=6 (P04264)	Keratin, type II cytoskeletal 1 OS=Homo sapiens GN=KRT1 PE=1 SV=6	P04264	Uniprot_human_V1.fasta	66040.3	1	28	32	58	0.00806	0.53
Cluster of Ubiquitin OS=Homo sapiens GN=UBB PE=2 SV=1 (B4DV12)	Ubiquitin OS=Homo sapiens GN=UBB PE=2 SV=1	B4DV12,F5GXK7,F5GYU3,F5H041,F5H265,F5H2Z3,F5H388,F5H4D8,F5H6Q2,F5H747,F5H7K6,F5H7Y5,J3QKN0,J3QS39,J3QTR3,P0CG47,P0CG48,P62979,P62987,Q96C32	Uniprot_human_V1.fasta	17215.6	1	3	3	3	0.000417	0.203
Cluster of Thyroglobulin OS=Homo sapiens GN=TG PE=1 SV=5 (P01266)	Thyroglobulin OS=Homo sapiens GN=TG PE=1 SV=5	P01266,P01266-2	Uniprot_human_V1.fasta	304786	1	2	2	2	0.000278	0.00831
Cluster of Complement component C9 OS=Homo sapiens GN=C9 PE=1 SV=2 (P02748)	Complement component C9 OS=Homo sapiens GN=C9 PE=1 SV=2	P02748	Uniprot_human_V1.fasta	63174.9	1	14	14	17	0.00236	0.225
Cluster of Apolipoprotein E OS=Homo sapiens GN=APOE PE=1 SV=1 (P02649)	Apolipoprotein E OS=Homo sapiens GN=APOE PE=1 SV=1	P02649	Uniprot_human_V1.fasta	36153.5	1	11	13	14	0.00195	0.334
Cluster of Apolipoprotein A-I OS=Homo sapiens GN=APOA1 PE=1 SV=1 (P02647)	Apolipoprotein A-I OS=Homo sapiens GN=APOA1 PE=1 SV=1	P02647	Uniprot_human_V1.fasta	30778.5	1	12	12	12	0.00167	0.438
Cluster of Ig kappa chain C region OS=Homo sapiens GN=IGKC PE=1 SV=1 (P01834)	Ig kappa chain C region OS=Homo sapiens GN=IGKC PE=1 SV=1	P01834	Uniprot_human_V1.fasta	11608.6	1	4	4	4	0.000556	0.481
Cluster of Histone H2A type 1-B/E OS=Homo sapiens GN=HIST1H2AB PE=1 SV=2 (P04908)	Histone H2A type 1-B/E OS=Homo sapiens GN=HIST1H2AB PE=1 SV=2	P04908,Q7L7L0,Q93077	Uniprot_human_V1.fasta	14136.1	0.94	1	1	3	0.000417	0.154
Cluster of Keratin, type II cytoskeletal 2 epidermal OS=Homo sapiens GN=KRT2 PE=1 SV=2 (P35908)	Keratin, type II cytoskeletal 6B OS=Homo sapiens GN=KRT6B PE=1 SV=5	P04259	Uniprot_human_V1.fasta	60068.6	1	2	2	21	0.00292	0.252
Cluster of Transforming growth factor-beta-induced protein ig-h3 OS=Homo sapiens GN=TGFBI PE=4 SV=1 (G8JLA8)	Transforming growth factor-beta-induced protein ig-h3 OS=Homo sapiens GN=TGFBI PE=4 SV=1	G8JLA8,Q15582	Uniprot_human_V1.fasta	74695.8	1	7	7	7	0.000973	0.114
Cluster of Thrombospondin-4 OS=Homo sapiens GN=THBS4 PE=4 SV=1 (E7ES19)	Thrombospondin-4 OS=Homo sapiens GN=THBS4 PE=4 SV=1	E7ES19,P35443	Uniprot_human_V1.fasta	96005.3	1	6	6	8	0.00111	0.143
Cluster of Keratin, type I cytoskeletal 16 OS=Homo sapiens GN=KRT16 PE=1 SV=4 (P08779)	Keratin, type I cytoskeletal 13 OS=Homo sapiens GN=KRT13 PE=1 SV=4	P13646,P13646-3	Uniprot_human_V1.fasta	49589.3	0.998	1	1	10	0.00139	0.114
Cluster of Tenascin XB (Fragment) OS=Homo sapiens GN=TNXB PE=4 SV=1 (B0UYQ5)	Tenascin XB (Fragment) OS=Homo sapiens GN=TNXB PE=4 SV=1	B0UYQ5,B0UYX3,B0V046,E7EPQ1,E7EPZ9,E7EU03,E7EWZ8,G5E9A9,P22105,P22105-3	Uniprot_human_V1.fasta	245150	1	8	8	8	0.00111	0.0447
Cluster of Latent-transforming growth factor beta-binding protein 2 OS=Homo sapiens GN=LTBP2 PE=4 SV=1 (G3V3X5)	Latent-transforming growth factor beta-binding protein 2 OS=Homo sapiens GN=LTBP2 PE=4 SV=1	G3V3X5,G3V511,Q14767	Uniprot_human_V1.fasta	190278	1	4	4	4	0.000556	0.0242
Cluster of Asporin OS=Homo sapiens GN=ASPN PE=1 SV=2 (Q9BXN1)	Asporin OS=Homo sapiens GN=ASPN PE=1 SV=2	Q9BXN1	Uniprot_human_V1.fasta	43419.8	1	4	4	4	0.000556	0.124
Cluster of Histidine-rich glycoprotein OS=Homo sapiens GN=HRG PE=1 SV=1 (P04196)	Histidine-rich glycoprotein OS=Homo sapiens GN=HRG PE=1 SV=1	P04196	Uniprot_human_V1.fasta	59576.6	0.999	2	2	2	0.000278	0.0476
Cluster of Lumican OS=Homo sapiens GN=LUM PE=1 SV=2 (P51884)	Lumican OS=Homo sapiens GN=LUM PE=1 SV=2	P51884	Uniprot_human_V1.fasta	38431.5	1	6	6	7	0.000973	0.183
Cluster of Collagen alpha-3(VI) chain OS=Homo sapiens GN=COL6A3 PE=1 SV=5 (P12111)	Collagen alpha-3(VI) chain OS=Homo sapiens GN=COL6A3 PE=1 SV=5	P12111,P12111-2	Uniprot_human_V1.fasta	343667	1	78	85	103	0.0143	0.265
Cluster of EGF-containing fibulin-like extracellular matrix protein 1 OS=Homo sapiens GN=EFEMP1 PE=1 SV=2 (Q12805)	EGF-containing fibulin-like extracellular matrix protein 1 OS=Homo sapiens GN=EFEMP1 PE=1 SV=2	Q12805,Q12805-2,Q12805-3,Q12805-4	Uniprot_human_V1.fasta	54639.1	1	6	6	6	0.000834	0.142
Cluster of Collagen alpha-1(XII) chain OS=Homo sapiens GN=COL12A1 PE=4 SV=1 (D6RGG3)	Collagen alpha-1(XII) chain OS=Homo sapiens GN=COL12A1 PE=4 SV=1	D6RGG3,Q99715,Q99715-2,Q99715-4	Uniprot_human_V1.fasta	333200	1	4	4	4	0.000556	0.016
Cluster of Interleukin-17D OS=Homo sapiens GN=IL17D PE=2 SV=1 (Q8TAD2)	Interleukin-17D OS=Homo sapiens GN=IL17D PE=2 SV=1	Q8TAD2	Uniprot_human_V1.fasta	21893.5	1	2	2	2	0.000278	0.104
Cluster of Isoform 2 of Clusterin OS=Homo sapiens GN=CLU (P10909-2)	Isoform 2 of Clusterin OS=Homo sapiens GN=CLU	P10909-2	Uniprot_human_V1.fasta	57832.6	1	6	6	6	0.000834	0.156
Cluster of Cartilage oligomeric matrix protein OS=Homo sapiens GN=COMP PE=2 SV=1 (B4DKJ3)	Cartilage oligomeric matrix protein OS=Homo sapiens GN=COMP PE=2 SV=1	B4DKJ3,G3XAP6,P49747	Uniprot_human_V1.fasta	77211.8	0.999	3	3	5	0.000695	0.101
Cluster of Decorin (Fragment) OS=Homo sapiens GN=DCN PE=4 SV=1 (F8VUF6)	Decorin (Fragment) OS=Homo sapiens GN=DCN PE=4 SV=1	F8VUF6,F8VWU0,F8VXZ8,P07585	Uniprot_human_V1.fasta	20089.3	1	6	7	8	0.00111	0.371
Cluster of Keratin, type II cytoskeletal 2 epidermal OS=Homo sapiens GN=KRT2 PE=1 SV=2 (P35908)	Keratin, type II cytoskeletal 2 epidermal OS=Homo sapiens GN=KRT2 PE=1 SV=2	P35908	Uniprot_human_V1.fasta	65433.9	1	18	20	36	0.005	0.44
Cluster of Ig lambda-6 chain C region OS=Homo sapiens GN=IGLC6 PE=4 SV=1 (P0CF74)	Ig lambda-6 chain C region OS=Homo sapiens GN=IGLC6 PE=4 SV=1	P0CF74,P0CG05,P0CG06	Uniprot_human_V1.fasta	11276.2	1	3	4	6	0.000834	0.462
Cluster of Secreted frizzled-related protein 2 OS=Homo sapiens GN=SFRP2 PE=1 SV=2 (Q96HF1)	Secreted frizzled-related protein 2 OS=Homo sapiens GN=SFRP2 PE=1 SV=2	Q96HF1	Uniprot_human_V1.fasta	33491.1	0.982	2	2	2	0.000278	0.0576
Cluster of Hemoglobin subunit beta OS=Homo sapiens GN=HBB PE=1 SV=2 (P68871)	Hemoglobin subunit delta OS=Homo sapiens GN=HBD PE=1 SV=2	P02042	Uniprot_human_V1.fasta	16055.2	1	2	2	9	0.00125	0.422
Cluster of Keratin, type II cytoskeletal 2 epidermal OS=Homo sapiens GN=KRT2 PE=1 SV=2 (P35908)	Keratin, type II cytoskeletal 6A OS=Homo sapiens GN=KRT6A PE=1 SV=3	P02538	Uniprot_human_V1.fasta	60046.4	1	3	3	20	0.00278	0.282
Cluster of Keratin, type I cytoskeletal 16 OS=Homo sapiens GN=KRT16 PE=1 SV=4 (P08779)	Keratin, type I cytoskeletal 14 OS=Homo sapiens GN=KRT14 PE=1 SV=4	P02533	Uniprot_human_V1.fasta	51562.5	1	6	6	25	0.00347	0.468
Cluster of Histone H4 OS=Homo sapiens GN=HIST1H4A PE=1 SV=2 (P62805)	Histone H4 OS=Homo sapiens GN=HIST1H4A PE=1 SV=2	P62805	Uniprot_human_V1.fasta	11367.7	1	2	3	3	0.000417	0.243
Cluster of Angiopoietin-related protein 2 OS=Homo sapiens GN=ANGPTL2 PE=2 SV=1 (Q9UKU9)	Angiopoietin-related protein 2 OS=Homo sapiens GN=ANGPTL2 PE=2 SV=1	Q9UKU9	Uniprot_human_V1.fasta	57104.9	1	2	2	2	0.000278	0.0527
Cluster of Complement component C4B (Childo blood group) OS=Homo sapiens GN=C4B-1 PE=4 SV=1 (A2BHY4)	Complement component C4B (Childo blood group) OS=Homo sapiens GN=C4B-1 PE=4 SV=1	A2BHY4,A6H8M8,B0UZ83,B0V2C8,F5GXS0,F8VNV9,F8VSI2,F8VW91,F8VX64,F8VZD8,P0C0L4,P0C0L5,Q5JNX2,Q6U2E9	Uniprot_human_V1.fasta	192799	0.981	2	2	2	0.000278	0.0161
Cluster of Prelamin-A/C OS=Homo sapiens GN=LMNA PE=1 SV=1 (P02545)	Prelamin-A/C OS=Homo sapiens GN=LMNA PE=1 SV=1	P02545,P02545-3	Uniprot_human_V1.fasta	74140.7	1	11	11	12	0.00167	0.199
Cluster of Keratin, type II cytoskeletal 78 OS=Homo sapiens GN=KRT78 PE=2 SV=2 (Q8N1N4)	Keratin, type II cytoskeletal 78 OS=Homo sapiens GN=KRT78 PE=2 SV=2	Q8N1N4	Uniprot_human_V1.fasta	56866.4	0.99	3	3	3	0.000417	0.0615
Cluster of Histone H1.3 OS=Homo sapiens GN=HIST1H1D PE=1 SV=2 (P16402)	Histone H1.3 OS=Homo sapiens GN=HIST1H1D PE=1 SV=2	P16402	Uniprot_human_V1.fasta	22351.3	1	4	4	5	0.000695	0.14
Cluster of Histone H3 OS=Homo sapiens GN=H3F3A PE=2 SV=1 (B4DEB1)	Histone H3 OS=Homo sapiens GN=H3F3A PE=2 SV=1	B4DEB1,P68431,P84243,Q16695,Q71DI3	Uniprot_human_V1.fasta	14052.9	0.999	1	1	3	0.000417	0.22
Cluster of ATP synthase subunit alpha OS=Homo sapiens GN=ATP5A1 PE=2 SV=1 (A8K092)	ATP synthase subunit alpha OS=Homo sapiens GN=ATP5A1 PE=2 SV=1	A8K092,P25705	Uniprot_human_V1.fasta	54495.1	0.985	2	2	2	0.000278	0.0437
Cluster of Podocan OS=Homo sapiens GN=PODN PE=1 SV=2 (Q7Z5L7)	Podocan OS=Homo sapiens GN=PODN PE=1 SV=2	Q7Z5L7,Q7Z5L7-2,Q7Z5L7-3	Uniprot_human_V1.fasta	68979.1	1	6	6	7	0.000973	0.113
Cluster of Collagen alpha-1(III) chain OS=Homo sapiens GN=COL3A1 PE=1 SV=4 (P02461)	Collagen alpha-1(III) chain OS=Homo sapiens GN=COL3A1 PE=1 SV=4	P02461	Uniprot_human_V1.fasta	138565	0.998	2	2	2	0.000278	0.0205
Cluster of Apolipoprotein A-IV OS=Homo sapiens GN=APOA4 PE=1 SV=3 (P06727)	Apolipoprotein A-IV OS=Homo sapiens GN=APOA4 PE=1 SV=3	P06727	Uniprot_human_V1.fasta	45399.4	1	30	32	37	0.00514	0.609
Cluster of Fibrillin-1 OS=Homo sapiens GN=FBN1 PE=1 SV=3 (P35555)	Fibrillin-1 OS=Homo sapiens GN=FBN1 PE=1 SV=3	P35555	Uniprot_human_V1.fasta	312226	1	44	45	46	0.00639	0.204
Cluster of Collagen alpha-1(I) chain OS=Homo sapiens GN=COL1A1 PE=1 SV=5 (P02452)	Collagen alpha-1(I) chain OS=Homo sapiens GN=COL1A1 PE=1 SV=5	P02452	Uniprot_human_V1.fasta	138941	1	9	10	13	0.00181	0.111
Cluster of Adipocyte enhancer-binding protein 1 OS=Homo sapiens GN=AEBP1 PE=1 SV=1 (Q8IUX7)	Adipocyte enhancer-binding protein 1 OS=Homo sapiens GN=AEBP1 PE=1 SV=1	Q8IUX7	Uniprot_human_V1.fasta	130931	1	3	3	3	0.000417	0.0242
Cluster of Gelsolin OS=Homo sapiens GN=GSN PE=4 SV=1 (F5H1A8)	Gelsolin OS=Homo sapiens GN=GSN PE=4 SV=1	F5H1A8,P06396,P06396-2,P06396-3	Uniprot_human_V1.fasta	81484.9	1	2	2	2	0.000278	0.0325
Cluster of Histone H2A type 1-B/E OS=Homo sapiens GN=HIST1H2AB PE=1 SV=2 (P04908)	Histone H2A type 1 OS=Homo sapiens GN=HIST1H2AG PE=1 SV=2	P0C0S8,P20671,Q16777,Q6FI13,Q96KK5,Q99878,Q9BTM1,Q9BTM1-2	Uniprot_human_V1.fasta	14092.1	0.851	1	1	3	0.000417	0.154
Cluster of Keratin, type I cytoskeletal 16 OS=Homo sapiens GN=KRT16 PE=1 SV=4 (P08779)	Keratin, type I cytoskeletal 16 OS=Homo sapiens GN=KRT16 PE=1 SV=4	P08779	Uniprot_human_V1.fasta	51269	1	7	7	23	0.0032	0.448
Cluster of Collagen alpha-2(VI) chain OS=Homo sapiens GN=COL6A2 PE=1 SV=4 (P12110)	Collagen alpha-2(VI) chain OS=Homo sapiens GN=COL6A2 PE=1 SV=4	P12110	Uniprot_human_V1.fasta	108581	1	16	16	21	0.00292	0.201
Cluster of Cartilage intermediate layer protein 1 OS=Homo sapiens GN=CILP PE=1 SV=4 (O75339)	Cartilage intermediate layer protein 1 OS=Homo sapiens GN=CILP PE=1 SV=4	O75339	Uniprot_human_V1.fasta	132565	1	18	18	19	0.00264	0.183
Cluster of Collagen alpha-1(VI) chain OS=Homo sapiens GN=COL6A1 PE=1 SV=3 (P12109)	Collagen alpha-1(VI) chain OS=Homo sapiens GN=COL6A1 PE=1 SV=3	P12109	Uniprot_human_V1.fasta	108531	1	12	13	23	0.0032	0.132
Cluster of Collagen alpha-1(XIV) chain OS=Homo sapiens GN=COL14A1 PE=1 SV=3 (Q05707)	Collagen alpha-1(XIV) chain OS=Homo sapiens GN=COL14A1 PE=1 SV=3	Q05707,Q05707-2	Uniprot_human_V1.fasta	193516	1	17	17	18	0.0025	0.111
Cluster of Alcohol dehydrogenase 1B OS=Homo sapiens GN=ADH1B PE=1 SV=2 (P00325)	Alcohol dehydrogenase 1B OS=Homo sapiens GN=ADH1B PE=1 SV=2	P00325	Uniprot_human_V1.fasta	39854.3	0.994	2	2	2	0.000278	0.0453
Cluster of Annexin A5 OS=Homo sapiens GN=ANXA5 PE=1 SV=2 (P08758)	Annexin A5 OS=Homo sapiens GN=ANXA5 PE=1 SV=2	P08758	Uniprot_human_V1.fasta	35938.6	1	4	4	4	0.000556	0.125
Cluster of Complement factor H OS=Homo sapiens GN=CFH PE=1 SV=4 (P08603)	Complement factor H-related 1 OS=Homo sapiens GN=CFHR1 PE=4 SV=1	B1AKG0,Q03591	Uniprot_human_V1.fasta	30858.1	0.764	1	1	2	0.000278	0.0812
Cluster of Hemoglobin subunit alpha OS=Homo sapiens GN=HBA1 PE=1 SV=2 (P69905)	Hemoglobin subunit alpha OS=Homo sapiens GN=HBA1 PE=1 SV=2	P69905	Uniprot_human_V1.fasta	15257.6	1	6	6	7	0.000973	0.423
Cluster of Annexin A1 OS=Homo sapiens GN=ANXA1 PE=1 SV=2 (P04083)	Annexin A1 OS=Homo sapiens GN=ANXA1 PE=1 SV=2	P04083	Uniprot_human_V1.fasta	38715.9	0.917	2	2	2	0.000278	0.0694
Cluster of Fibrinogen alpha chain OS=Homo sapiens GN=FGA PE=1 SV=2 (P02671)	Fibrinogen alpha chain OS=Homo sapiens GN=FGA PE=1 SV=2	P02671,P02671-2	Uniprot_human_V1.fasta	94973.4	0.992	3	3	3	0.000417	0.0346
Cluster of Fibronectin OS=Homo sapiens GN=FN1 PE=4 SV=1 (E9PE77)	Fibronectin OS=Homo sapiens GN=FN1 PE=4 SV=1	E9PE77,F8W7G7,P02751,P02751-10,P02751-11,P02751-12,P02751-13,P02751-14,P02751-15,P02751-3,P02751-5,P02751-7,P02751-8,P02751-9	Uniprot_human_V1.fasta	256494	1	7	8	8	0.00111	0.0438
Cluster of Arginase-1 OS=Homo sapiens GN=ARG1 PE=1 SV=2 (P05089)	Arginase-1 OS=Homo sapiens GN=ARG1 PE=1 SV=2	P05089,P05089-2,P05089-3	Uniprot_human_V1.fasta	34736.1	0.971	2	2	2	0.000278	0.0683
Cluster of Plasminogen OS=Homo sapiens GN=PLG PE=1 SV=2 (P00747)	Plasminogen OS=Homo sapiens GN=PLG PE=1 SV=2	P00747	Uniprot_human_V1.fasta	90567.4	1	5	5	5	0.000695	0.0889
Cluster of Complement factor D OS=Homo sapiens GN=CFD PE=1 SV=5 (P00746)	Complement factor D OS=Homo sapiens GN=CFD PE=1 SV=5	P00746	Uniprot_human_V1.fasta	27032.4	1	4	4	5	0.000695	0.182
Cluster of Histone H3 OS=Homo sapiens GN=H3F3A PE=2 SV=1 (B4DEB1)	Histone H3 OS=Homo sapiens GN=HIST2H3PS2 PE=3 SV=1	Q5TEC6	Uniprot_human_V1.fasta	15430.7	0.924	1	1	3	0.000417	0.199
Cluster of Secreted frizzled-related protein 1 OS=Homo sapiens GN=SFRP1 PE=1 SV=1 (Q8N474)	Secreted frizzled-related protein 1 OS=Homo sapiens GN=SFRP1 PE=1 SV=1	Q8N474	Uniprot_human_V1.fasta	35386.3	0.999	2	2	2	0.000278	0.0892
Cluster of ATP synthase subunit beta OS=Homo sapiens GN=ATP5B PE=3 SV=1 (F8VPV9)	ATP synthase subunit beta OS=Homo sapiens GN=ATP5B PE=3 SV=1	F8VPV9,P06576	Uniprot_human_V1.fasta	55309.1	1	2	2	2	0.000278	0.0521
Cluster of Desmoplakin OS=Homo sapiens GN=DSP PE=1 SV=3 (P15924)	Desmoplakin OS=Homo sapiens GN=DSP PE=1 SV=3	P15924	Uniprot_human_V1.fasta	331781	1	6	6	6	0.000834	0.0237
Cluster of Haptoglobin beta chain (Fragment) OS=Homo sapiens GN=HP PE=3 SV=1 (J3QLC9)	Haptoglobin beta chain (Fragment) OS=Homo sapiens GN=HP PE=3 SV=1	J3QLC9,P00738	Uniprot_human_V1.fasta	40779.7	1	5	5	5	0.000695	0.2
Cluster of Biglycan OS=Homo sapiens GN=BGN PE=2 SV=1 (A6NLG9)	Biglycan OS=Homo sapiens GN=BGN PE=2 SV=1	A6NLG9,P21810	Uniprot_human_V1.fasta	34877.2	1	5	5	6	0.000834	0.189
Cluster of Vimentin OS=Homo sapiens GN=VIM PE=1 SV=4 (P08670)	Vimentin OS=Homo sapiens GN=VIM PE=1 SV=4	P08670	Uniprot_human_V1.fasta	53652.7	1	22	22	22	0.00306	0.506
Cluster of Vitronectin OS=Homo sapiens GN=VTN PE=1 SV=1 (P04004)	Vitronectin OS=Homo sapiens GN=VTN PE=1 SV=1	P04004	Uniprot_human_V1.fasta	54306.1	1	8	9	11	0.00153	0.174
Cluster of Serotransferrin OS=Homo sapiens GN=TF PE=1 SV=3 (P02787)	Serotransferrin OS=Homo sapiens GN=TF PE=1 SV=3	P02787	Uniprot_human_V1.fasta	77064.3	1	7	7	7	0.000973	0.117
Cluster of Heat shock cognate 71 kDa protein (Fragment) OS=Homo sapiens GN=HSPA8 PE=3 SV=1 (E9PI65)	Heat shock cognate 71 kDa protein (Fragment) OS=Homo sapiens GN=HSPA8 PE=3 SV=1	E9PI65,E9PK54,E9PKE3,E9PLF4,E9PQK7,E9PQQ4,P11142,P11142-2	Uniprot_human_V1.fasta	17916.3	0.99	2	2	2	0.000278	0.137

## Sheet: training-7
Cluster	Protein name	Protein accession numbers	Database sources	Protein molecular weight (Da)	Protein identification probability	Exclusive unique peptide count	Exclusive unique spectrum count	Total spectrum count	Percentage of total spectra	Percentage sequence coverage
Cluster of Elongation factor 1-alpha 1 OS=Homo sapiens GN=EEF1A1 PE=1 SV=1 (P68104)	Elongation factor 1-alpha 1 OS=Homo sapiens GN=EEF1A1 PE=1 SV=1	P68104,Q5VTE0	Uniprot_human_V1.fasta	50141.2	1	3	3	3	0.000398	0.0931
Cluster of Myosin-9 OS=Homo sapiens GN=MYH9 PE=1 SV=4 (P35579)	Myosin-9 OS=Homo sapiens GN=MYH9 PE=1 SV=4	P35579,P35579-2	Uniprot_human_V1.fasta	226538	1	4	4	6	0.000796	0.0352
Cluster of Complement C3 OS=Homo sapiens GN=C3 PE=1 SV=2 (P01024)	Complement C3 OS=Homo sapiens GN=C3 PE=1 SV=2	P01024	Uniprot_human_V1.fasta	187149	1	14	14	14	0.00186	0.109
Cluster of Alpha-2-macroglobulin OS=Homo sapiens GN=A2M PE=1 SV=3 (P01023)	Alpha-2-macroglobulin OS=Homo sapiens GN=A2M PE=1 SV=3	P01023	Uniprot_human_V1.fasta	163290	1	7	7	7	0.000928	0.0597
Cluster of Collagen alpha-3(VI) chain OS=Homo sapiens GN=COL6A3 PE=1 SV=5 (P12111)	Collagen alpha-3(VI) chain OS=Homo sapiens GN=COL6A3 PE=4 SV=1	E9PCV6	Uniprot_human_V1.fasta	321999	0.805	1	1	58	0.00769	0.184
Cluster of Serum albumin OS=Homo sapiens GN=ALB PE=1 SV=2 (P02768)	Serum albumin OS=Homo sapiens GN=ALB PE=1 SV=2	P02768	Uniprot_human_V1.fasta	69366.9	1	27	29	34	0.00451	0.424
Cluster of Tryptase beta-2 OS=Homo sapiens GN=TPSB2 PE=3 SV=1 (F8W8D0)	Tryptase beta-2 OS=Homo sapiens GN=TPSB2 PE=3 SV=1	F8W8D0,H3BMK9,J3QTS8,P20231,Q15661,Q15661-2	Uniprot_human_V1.fasta	30593.6	1	4	4	5	0.000663	0.175
Cluster of Alpha-enolase OS=Homo sapiens GN=ENO1 PE=1 SV=2 (P06733)	Alpha-enolase OS=Homo sapiens GN=ENO1 PE=1 SV=2	P06733	Uniprot_human_V1.fasta	47170.2	0.998	3	3	3	0.000398	0.134
Cluster of Hemoglobin subunit beta OS=Homo sapiens GN=HBB PE=1 SV=2 (P68871)	Hemoglobin subunit beta OS=Homo sapiens GN=HBB PE=1 SV=2	P68871	Uniprot_human_V1.fasta	15998	1	3	3	10	0.00133	0.503
Cluster of Synaptic vesicle membrane protein VAT-1 homolog OS=Homo sapiens GN=VAT1 PE=1 SV=2 (Q99536)	Synaptic vesicle membrane protein VAT-1 homolog OS=Homo sapiens GN=VAT1 PE=1 SV=2	Q99536	Uniprot_human_V1.fasta	41919.8	0.996	2	2	2	0.000265	0.0611
Cluster of Alpha-1-antichymotrypsin His-Pro-less OS=Homo sapiens GN=SERPINA3 PE=3 SV=1 (G3V5I3)	Alpha-1-antichymotrypsin His-Pro-less OS=Homo sapiens GN=SERPINA3 PE=3 SV=1	G3V5I3,P01011	Uniprot_human_V1.fasta	50600.5	0.991	2	2	2	0.000265	0.0402
Cluster of Dihydropyrimidinase-related protein 2 OS=Homo sapiens GN=DPYSL2 PE=2 SV=1 (B4DR31)	Dihydropyrimidinase-related protein 2 OS=Homo sapiens GN=DPYSL2 PE=2 SV=1	B4DR31,Q16555	Uniprot_human_V1.fasta	58162.9	1	1	1	2	0.000265	0.0429
Cluster of Galectin-3 OS=Homo sapiens GN=LGALS3 PE=1 SV=5 (P17931)	Galectin-3 OS=Homo sapiens GN=LGALS3 PE=1 SV=5	P17931	Uniprot_human_V1.fasta	26152.8	1	3	3	3	0.000398	0.132
Cluster of Tubulin alpha-1B chain OS=Homo sapiens GN=TUBA1B PE=1 SV=1 (P68363)	Tubulin alpha-1B chain OS=Homo sapiens GN=TUBA1B PE=1 SV=1	P68363	Uniprot_human_V1.fasta	50151.7	1	1	1	6	0.000796	0.197
Cluster of Fibrillin-1 OS=Homo sapiens GN=FBN1 PE=1 SV=3 (P35555)	Fibrillin-1 OS=Homo sapiens GN=FBN1 PE=1 SV=3	P35555	Uniprot_human_V1.fasta	312226	1	28	29	30	0.00398	0.13
Cluster of Peptidyl-prolyl cis-trans isomerase B OS=Homo sapiens GN=PPIB PE=1 SV=2 (P23284)	Peptidyl-prolyl cis-trans isomerase B OS=Homo sapiens GN=PPIB PE=1 SV=2	P23284	Uniprot_human_V1.fasta	23743.2	0.977	3	3	3	0.000398	0.13
Cluster of Actin-related protein 2/3 complex subunit 4 OS=Homo sapiens GN=ARPC4 PE=4 SV=1 (C9JWM7)	Actin-related protein 2/3 complex subunit 4 OS=Homo sapiens GN=ARPC4 PE=4 SV=1	C9JWM7,F8WCF6,P59998	Uniprot_human_V1.fasta	21588.4	1	3	3	3	0.000398	0.144
Cluster of Glyceraldehyde-3-phosphate dehydrogenase OS=Homo sapiens GN=GAPDH PE=3 SV=1 (E7EUT4)	Glyceraldehyde-3-phosphate dehydrogenase OS=Homo sapiens GN=GAPDH PE=3 SV=1	E7EUT4,P04406	Uniprot_human_V1.fasta	31548	1	7	7	8	0.00106	0.283
Cluster of Galectin-1 OS=Homo sapiens GN=LGALS1 PE=1 SV=2 (P09382)	Galectin-1 OS=Homo sapiens GN=LGALS1 PE=1 SV=2	P09382	Uniprot_human_V1.fasta	14715.8	0.999	2	3	3	0.000398	0.148
Cluster of Collagen alpha-2(I) chain OS=Homo sapiens GN=COL1A2 PE=1 SV=7 (P08123)	Collagen alpha-2(I) chain OS=Homo sapiens GN=COL1A2 PE=1 SV=7	P08123	Uniprot_human_V1.fasta	129315	1	14	14	28	0.00371	0.116
Cluster of Ig alpha-1 chain C region OS=Homo sapiens GN=IGHA1 PE=1 SV=2 (P01876)	Ig alpha-1 chain C region OS=Homo sapiens GN=IGHA1 PE=1 SV=2	P01876	Uniprot_human_V1.fasta	37653.8	1	6	8	10	0.00133	0.263
Cluster of Heat shock 70 kDa protein 1A/1B OS=Homo sapiens GN=HSPA1A PE=1 SV=5 (P08107)	Heat shock 70 kDa protein 1A/1B OS=Homo sapiens GN=HSPA1A PE=1 SV=5	P08107	Uniprot_human_V1.fasta	70054	1	1	1	4	0.000531	0.0811
Cluster of Fibrinogen gamma chain OS=Homo sapiens GN=FGG PE=4 SV=1 (C9JC84)	Fibrinogen gamma chain OS=Homo sapiens GN=FGG PE=4 SV=1	C9JC84,C9JEU5,P02679,P02679-2	Uniprot_human_V1.fasta	52339.2	1	11	11	11	0.00146	0.367
Cluster of Triosephosphate isomerase OS=Homo sapiens GN=TPI1 PE=1 SV=3 (P60174)	Triosephosphate isomerase OS=Homo sapiens GN=TPI1 PE=1 SV=3	P60174,P60174-1	Uniprot_human_V1.fasta	30790.8	1	2	2	2	0.000265	0.101
Cluster of Keratin, type II cytoskeletal 2 epidermal OS=Homo sapiens GN=KRT2 PE=1 SV=2 (P35908)	Keratin, type II cytoskeletal 5 OS=Homo sapiens GN=KRT5 PE=1 SV=3	P13647	Uniprot_human_V1.fasta	62379.6	1	8	8	16	0.00212	0.241
Cluster of Keratin, type I cytoskeletal 10 OS=Homo sapiens GN=KRT10 PE=1 SV=6 (P13645)	Keratin, type I cytoskeletal 10 OS=Homo sapiens GN=KRT10 PE=1 SV=6	P13645	Uniprot_human_V1.fasta	58828.8	1	16	16	24	0.00318	0.336
Cluster of Fibrinogen beta chain OS=Homo sapiens GN=FGB PE=1 SV=2 (P02675)	Fibrinogen beta chain OS=Homo sapiens GN=FGB PE=1 SV=2	P02675	Uniprot_human_V1.fasta	55928.6	1	9	9	10	0.00133	0.24
Cluster of Complement factor H OS=Homo sapiens GN=CFH PE=1 SV=4 (P08603)	Complement factor H OS=Homo sapiens GN=CFH PE=1 SV=4	P08603	Uniprot_human_V1.fasta	139096	1	3	3	3	0.000398	0.0284
Cluster of Serum amyloid P-component OS=Homo sapiens GN=APCS PE=1 SV=2 (P02743)	Serum amyloid P-component OS=Homo sapiens GN=APCS PE=1 SV=2	P02743	Uniprot_human_V1.fasta	25387.7	0.995	2	2	2	0.000265	0.0628
Cluster of Actin, cytoplasmic 1 OS=Homo sapiens GN=ACTB PE=1 SV=1 (P60709)	Actin, cytoplasmic 1 OS=Homo sapiens GN=ACTB PE=1 SV=1	P60709,P63261	Uniprot_human_V1.fasta	41737.8	1	6	7	11	0.00146	0.267
Cluster of Ig gamma-1 chain C region OS=Homo sapiens GN=IGHG1 PE=1 SV=1 (P01857)	Ig gamma-4 chain C region OS=Homo sapiens GN=IGHG4 PE=1 SV=1	P01861	Uniprot_human_V1.fasta	35939.5	1	2	3	11	0.00146	0.266
Cluster of Ig gamma-1 chain C region OS=Homo sapiens GN=IGHG1 PE=1 SV=1 (P01857)	Ig gamma-3 chain C region OS=Homo sapiens GN=IGHG3 PE=1 SV=2	P01860	Uniprot_human_V1.fasta	41285.9	0.999	1	1	14	0.00186	0.231
Cluster of Peroxiredoxin-2 OS=Homo sapiens GN=PRDX2 PE=1 SV=5 (P32119)	Peroxiredoxin-2 OS=Homo sapiens GN=PRDX2 PE=1 SV=5	P32119	Uniprot_human_V1.fasta	21892.4	1	2	2	3	0.000398	0.187
Cluster of Keratin, type I cytoskeletal 9 OS=Homo sapiens GN=KRT9 PE=1 SV=3 (P35527)	Keratin, type I cytoskeletal 9 OS=Homo sapiens GN=KRT9 PE=1 SV=3	P35527	Uniprot_human_V1.fasta	62065.9	1	19	20	28	0.00371	0.57
Cluster of Elongation factor 2 OS=Homo sapiens GN=EEF2 PE=1 SV=4 (P13639)	Elongation factor 2 OS=Homo sapiens GN=EEF2 PE=1 SV=4	P13639	Uniprot_human_V1.fasta	95340.1	1	3	3	3	0.000398	0.0338
Cluster of 40S ribosomal protein S16 OS=Homo sapiens GN=RPS16 PE=1 SV=2 (P62249)	40S ribosomal protein S16 OS=Homo sapiens GN=RPS16 PE=1 SV=2	P62249,Q6IPX4	Uniprot_human_V1.fasta	16445.9	1	2	2	2	0.000265	0.144
Cluster of Phosphoglycerate kinase 1 OS=Homo sapiens GN=PGK1 PE=1 SV=3 (P00558)	Phosphoglycerate kinase 1 OS=Homo sapiens GN=PGK1 PE=1 SV=3	P00558	Uniprot_human_V1.fasta	44615.3	0.999	4	4	4	0.000531	0.127
Cluster of Ig gamma-1 chain C region OS=Homo sapiens GN=IGHG1 PE=1 SV=1 (P01857)	Ig gamma-2 chain C region OS=Homo sapiens GN=IGHG2 PE=1 SV=2	P01859	Uniprot_human_V1.fasta	35899.2	1	3	4	17	0.00225	0.316
Cluster of Histone H2B OS=Homo sapiens GN=HIST2H2BF PE=2 SV=1 (B4DR52)	Histone H2B OS=Homo sapiens GN=HIST2H2BF PE=2 SV=1	B4DR52,O60814,P57053,P58876,P62807,Q5QNW6,Q5QNW6-2,Q93079,Q99877,Q99879,Q99880	Uniprot_human_V1.fasta	18041.3	1	2	2	3	0.000398	0.108
Cluster of Ig gamma-1 chain C region OS=Homo sapiens GN=IGHG1 PE=1 SV=1 (P01857)	Ig gamma-1 chain C region OS=Homo sapiens GN=IGHG1 PE=1 SV=1	P01857	Uniprot_human_V1.fasta	36105	1	6	8	25	0.00332	0.433
Cluster of Histone H2A type 1 OS=Homo sapiens GN=HIST1H2AG PE=1 SV=2 (P0C0S8)	Histone H2A type 1 OS=Homo sapiens GN=HIST1H2AG PE=1 SV=2	P0C0S8,P20671,Q16777,Q6FI13,Q96KK5,Q99878,Q9BTM1	Uniprot_human_V1.fasta	14092.1	0.999	1	1	4	0.000531	0.3
Cluster of Profilin-1 OS=Homo sapiens GN=PFN1 PE=1 SV=2 (P07737)	Profilin-1 OS=Homo sapiens GN=PFN1 PE=1 SV=2	P07737	Uniprot_human_V1.fasta	15054.3	1	3	3	3	0.000398	0.257
Cluster of Peptidyl-prolyl cis-trans isomerase A OS=Homo sapiens GN=PPIA PE=1 SV=2 (P62937)	Peptidyl-prolyl cis-trans isomerase A OS=Homo sapiens GN=PPIA PE=1 SV=2	P62937	Uniprot_human_V1.fasta	18012.9	1	2	2	2	0.000265	0.152
Cluster of Mimecan OS=Homo sapiens GN=OGN PE=1 SV=1 (P20774)	Mimecan OS=Homo sapiens GN=OGN PE=1 SV=1	P20774	Uniprot_human_V1.fasta	33925	1	6	6	6	0.000796	0.161
Cluster of 78 kDa glucose-regulated protein OS=Homo sapiens GN=HSPA5 PE=1 SV=2 (P11021)	78 kDa glucose-regulated protein OS=Homo sapiens GN=HSPA5 PE=1 SV=2	P11021	Uniprot_human_V1.fasta	72334.7	1	3	3	4	0.000531	0.0719
Cluster of Basement membrane-specific heparan sulfate proteoglycan core protein OS=Homo sapiens GN=HSPG2 PE=1 SV=4 (P98160)	Basement membrane-specific heparan sulfate proteoglycan core protein OS=Homo sapiens GN=HSPG2 PE=1 SV=4	P98160	Uniprot_human_V1.fasta	468811	1	3	3	3	0.000398	0.0105
Cluster of Annexin (Fragment) OS=Homo sapiens GN=ANXA2 PE=3 SV=1 (H0YKS4)	Annexin (Fragment) OS=Homo sapiens GN=ANXA2 PE=3 SV=1	H0YKS4,H0YMD0,H0YMU9,H0YN42,P07355,P07355-2	Uniprot_human_V1.fasta	19531.2	1	3	3	3	0.000398	0.17
Cluster of ATP synthase subunit O, mitochondrial OS=Homo sapiens GN=ATP5O PE=1 SV=1 (P48047)	ATP synthase subunit O, mitochondrial OS=Homo sapiens GN=ATP5O PE=1 SV=1	P48047	Uniprot_human_V1.fasta	23277.4	0.99	2	2	2	0.000265	0.122
Cluster of Peroxiredoxin-1 OS=Homo sapiens GN=PRDX1 PE=1 SV=1 (Q06830)	Peroxiredoxin-1 OS=Homo sapiens GN=PRDX1 PE=1 SV=1	Q06830	Uniprot_human_V1.fasta	22110.9	1	3	3	4	0.000531	0.166
Cluster of Glutathione S-transferase P OS=Homo sapiens GN=GSTP1 PE=1 SV=2 (P09211)	Glutathione S-transferase P OS=Homo sapiens GN=GSTP1 PE=1 SV=2	P09211	Uniprot_human_V1.fasta	23356.7	0.998	2	2	2	0.000265	0.148
Cluster of Keratin, type II cytoskeletal 1 OS=Homo sapiens GN=KRT1 PE=1 SV=6 (P04264)	Keratin, type II cytoskeletal 1 OS=Homo sapiens GN=KRT1 PE=1 SV=6	P04264	Uniprot_human_V1.fasta	66040.3	1	29	35	72	0.00955	0.562
Cluster of Ubiquitin OS=Homo sapiens GN=UBB PE=2 SV=1 (B4DV12)	Ubiquitin OS=Homo sapiens GN=UBB PE=2 SV=1	B4DV12,F5GXK7,F5GYU3,F5H041,F5H265,F5H2Z3,F5H388,F5H6Q2,F5H747,F5H7K6,F5H7Y5,J3QKN0,J3QS39,J3QTR3,P0CG47,P0CG48,P62979,P62987,Q96C32	Uniprot_human_V1.fasta	17215.6	0.998	3	3	3	0.000398	0.203
Cluster of Alpha-1B-glycoprotein OS=Homo sapiens GN=A1BG PE=1 SV=4 (P04217)	Alpha-1B-glycoprotein OS=Homo sapiens GN=A1BG PE=1 SV=4	P04217,P04217-2	Uniprot_human_V1.fasta	54253.3	0.933	2	2	2	0.000265	0.0485
Cluster of Fibromodulin OS=Homo sapiens GN=FMOD PE=1 SV=2 (Q06828)	Fibromodulin OS=Homo sapiens GN=FMOD PE=1 SV=2	Q06828	Uniprot_human_V1.fasta	43180.4	1	4	4	5	0.000663	0.12
Cluster of Ig kappa chain C region OS=Homo sapiens GN=IGKC PE=1 SV=1 (P01834)	Ig kappa chain C region OS=Homo sapiens GN=IGKC PE=1 SV=1	P01834	Uniprot_human_V1.fasta	11608.6	1	5	6	10	0.00133	0.67
Cluster of Coagulation factor XIII A chain OS=Homo sapiens GN=F13A1 PE=1 SV=4 (P00488)	Coagulation factor XIII A chain OS=Homo sapiens GN=F13A1 PE=1 SV=4	P00488	Uniprot_human_V1.fasta	83267.3	1	3	3	4	0.000531	0.056
Cluster of Histone H2A type 1 OS=Homo sapiens GN=HIST1H2AG PE=1 SV=2 (P0C0S8)	Histone H2A type 1-B/E OS=Homo sapiens GN=HIST1H2AB PE=1 SV=2	P04908,Q7L7L0,Q93077	Uniprot_human_V1.fasta	14136.1	0.956	1	1	4	0.000531	0.3
Cluster of Keratinocyte proline-rich protein OS=Homo sapiens GN=KPRP PE=1 SV=1 (Q5T749)	Keratinocyte proline-rich protein OS=Homo sapiens GN=KPRP PE=1 SV=1	Q5T749	Uniprot_human_V1.fasta	64132.6	0.999	2	2	2	0.000265	0.057
Cluster of Histone H2A (Fragment) OS=Homo sapiens GN=H2AFY2 PE=2 SV=1 (Q5SQT3)	Histone H2A (Fragment) OS=Homo sapiens GN=H2AFY2 PE=2 SV=1	Q5SQT3,Q9P0M6	Uniprot_human_V1.fasta	26253	0.869	2	2	2	0.000265	0.0494
Cluster of Heterogeneous nuclear ribonucleoproteins C1/C2 OS=Homo sapiens GN=HNRNPC PE=2 SV=1 (B4DSU6)	Heterogeneous nuclear ribonucleoproteins C1/C2 OS=Homo sapiens GN=HNRNPC PE=2 SV=1	B4DSU6,B4DY08,G3V251,G3V2Q1,G3V3K6,G3V4C1,G3V4W0,G3V555,G3V575,G3V576,G3V5X6,P07910,P07910-2,P07910-4	Uniprot_human_V1.fasta	15734.7	0.999	2	2	2	0.000265	0.19
Cluster of Asporin OS=Homo sapiens GN=ASPN PE=1 SV=2 (Q9BXN1)	Asporin OS=Homo sapiens GN=ASPN PE=1 SV=2	Q9BXN1	Uniprot_human_V1.fasta	43419.8	1	3	3	3	0.000398	0.132
Cluster of Prolargin OS=Homo sapiens GN=PRELP PE=1 SV=1 (P51888)	Prolargin OS=Homo sapiens GN=PRELP PE=1 SV=1	P51888	Uniprot_human_V1.fasta	43812.4	1	10	12	15	0.00199	0.28
Cluster of Lumican OS=Homo sapiens GN=LUM PE=1 SV=2 (P51884)	Lumican OS=Homo sapiens GN=LUM PE=1 SV=2	P51884	Uniprot_human_V1.fasta	38431.5	1	5	6	10	0.00133	0.175
Cluster of Collagen alpha-3(VI) chain OS=Homo sapiens GN=COL6A3 PE=1 SV=5 (P12111)	Collagen alpha-3(VI) chain OS=Homo sapiens GN=COL6A3 PE=1 SV=5	P12111,P12111-2	Uniprot_human_V1.fasta	343667	1	2	2	59	0.00782	0.18
Cluster of L-lactate dehydrogenase OS=Homo sapiens GN=LDHA PE=3 SV=1 (F5H308)	L-lactate dehydrogenase OS=Homo sapiens GN=LDHA PE=3 SV=1	F5H308,P00338,P00338-3	Uniprot_human_V1.fasta	33656.7	0.959	2	2	2	0.000265	0.0625
Cluster of Collagen alpha-1(XII) chain OS=Homo sapiens GN=COL12A1 PE=4 SV=1 (D6RGG3)	Collagen alpha-1(XII) chain OS=Homo sapiens GN=COL12A1 PE=4 SV=1	D6RGG3,Q99715,Q99715-4	Uniprot_human_V1.fasta	333200	1	29	29	32	0.00424	0.11
Cluster of Keratin, type II cytoskeletal 2 epidermal OS=Homo sapiens GN=KRT2 PE=1 SV=2 (P35908)	Keratin, type II cytoskeletal 74 OS=Homo sapiens GN=KRT74 PE=3 SV=1	F8W1S1,Q7RTS7	Uniprot_human_V1.fasta	59408.6	0.721	1	1	4	0.000531	0.0534
Cluster of Neuroblast differentiation-associated protein AHNAK OS=Homo sapiens GN=AHNAK PE=1 SV=2 (Q09666)	Neuroblast differentiation-associated protein AHNAK OS=Homo sapiens GN=AHNAK PE=1 SV=2	Q09666	Uniprot_human_V1.fasta	629104	1	4	4	4	0.000531	0.00866
Cluster of Ceruloplasmin OS=Homo sapiens GN=CP PE=4 SV=1 (E9PFZ2)	Ceruloplasmin OS=Homo sapiens GN=CP PE=4 SV=1	E9PFZ2,P00450	Uniprot_human_V1.fasta	108823	1	5	5	5	0.000663	0.0761
Cluster of Myosin-9 OS=Homo sapiens GN=MYH9 PE=1 SV=4 (P35579)	Myosin-11 OS=Homo sapiens GN=MYH11 PE=1 SV=3	P35749,P35749-2,P35749-3,Q3MIV8	Uniprot_human_V1.fasta	227345	0.932	1	1	3	0.000398	0.0162
Cluster of Decorin OS=Homo sapiens GN=DCN PE=1 SV=1 (P07585)	Decorin OS=Homo sapiens GN=DCN PE=1 SV=1	P07585	Uniprot_human_V1.fasta	39748.2	1	7	7	8	0.00106	0.223
Cluster of Keratin, type II cytoskeletal 2 epidermal OS=Homo sapiens GN=KRT2 PE=1 SV=2 (P35908)	Keratin, type II cytoskeletal 2 epidermal OS=Homo sapiens GN=KRT2 PE=1 SV=2	P35908	Uniprot_human_V1.fasta	65433.9	1	13	16	30	0.00398	0.43
Cluster of Ig mu chain C region OS=Homo sapiens GN=IGHM PE=1 SV=3 (P01871)	Ig mu chain C region OS=Homo sapiens GN=IGHM PE=1 SV=3	P01871,P01871-2	Uniprot_human_V1.fasta	49305.7	1	6	6	6	0.000796	0.128
Cluster of Keratin, type II cytoskeletal 2 epidermal OS=Homo sapiens GN=KRT2 PE=1 SV=2 (P35908)	Keratin, type II cytoskeletal 73 OS=Homo sapiens GN=KRT73 PE=1 SV=1	Q86Y46	Uniprot_human_V1.fasta	58925.1	0.968	1	1	4	0.000531	0.0519
Cluster of Mast cell carboxypeptidase A OS=Homo sapiens GN=CPA3 PE=1 SV=2 (P15088)	Mast cell carboxypeptidase A OS=Homo sapiens GN=CPA3 PE=1 SV=2	P15088	Uniprot_human_V1.fasta	48671.8	1	4	4	5	0.000663	0.0815
Cluster of Versican core protein OS=Homo sapiens GN=VCAN PE=4 SV=2 (E9PF17)	Versican core protein OS=Homo sapiens GN=VCAN PE=4 SV=2	E9PF17,P13611,P13611-2,P13611-3,P13611-4,P13611-5	Uniprot_human_V1.fasta	176829	0.996	2	2	2	0.000265	0.0113
Cluster of 60S acidic ribosomal protein P0 (Fragment) OS=Homo sapiens GN=RPLP0 PE=3 SV=1 (F8VPE8)	60S acidic ribosomal protein P0 (Fragment) OS=Homo sapiens GN=RPLP0 PE=3 SV=1	F8VPE8,F8VU65,F8VW21,P05388,Q8NHW5	Uniprot_human_V1.fasta	16681.1	0.996	2	2	2	0.000265	0.163
Cluster of Ig lambda-2 chain C regions OS=Homo sapiens GN=IGLC2 PE=1 SV=1 (P0CG05)	Ig lambda-2 chain C regions OS=Homo sapiens GN=IGLC2 PE=1 SV=1	P0CG05,P0CG06	Uniprot_human_V1.fasta	11293.2	1	2	2	4	0.000531	0.557
Cluster of Keratin, type I cytoskeletal 14 OS=Homo sapiens GN=KRT14 PE=1 SV=4 (P02533)	Keratin, type I cytoskeletal 14 OS=Homo sapiens GN=KRT14 PE=1 SV=4	P02533	Uniprot_human_V1.fasta	51562.5	1	6	6	13	0.00172	0.286
Cluster of Histone H4 OS=Homo sapiens GN=HIST1H4A PE=1 SV=2 (P62805)	Histone H4 OS=Homo sapiens GN=HIST1H4A PE=1 SV=2	P62805	Uniprot_human_V1.fasta	11367.7	1	3	4	5	0.000663	0.32
Cluster of Actin, cytoplasmic 1 OS=Homo sapiens GN=ACTB PE=1 SV=1 (P60709)	Beta-actin-like protein 2 OS=Homo sapiens GN=ACTBL2 PE=1 SV=2	Q562R1	Uniprot_human_V1.fasta	42004.2	0.89	1	1	4	0.000531	0.0904
Cluster of Chymase OS=Homo sapiens GN=CMA1 PE=1 SV=1 (P23946)	Chymase OS=Homo sapiens GN=CMA1 PE=1 SV=1	P23946	Uniprot_human_V1.fasta	27325.5	1	7	7	7	0.000928	0.344
Cluster of Collagen alpha-2(VI) chain OS=Homo sapiens GN=COL6A2 PE=1 SV=4 (P12110)	Collagen alpha-2(VI) chain OS=Homo sapiens GN=COL6A2 PE=1 SV=4	P12110,P12110-2,P12110-3	Uniprot_human_V1.fasta	108581	1	5	5	6	0.000796	0.0579
Cluster of Tubulin beta chain OS=Homo sapiens GN=TUBB PE=4 SV=1 (E7EWR1)	Tubulin beta chain OS=Homo sapiens GN=TUBB PE=4 SV=1	E7EWR1,F8VUJ7,F8VW92,F8VYX6,P07437,Q5JP53,Q5ST81	Uniprot_human_V1.fasta	39727.7	1	4	4	4	0.000531	0.116
Cluster of Histone H1.4 OS=Homo sapiens GN=HIST1H1E PE=1 SV=2 (P10412)	Histone H1.4 OS=Homo sapiens GN=HIST1H1E PE=1 SV=2	P10412,P16402,P16403	Uniprot_human_V1.fasta	21866.9	1	3	3	3	0.000398	0.151
Cluster of Histone H3 OS=Homo sapiens GN=H3F3A PE=2 SV=1 (B4DEB1)	Histone H3 OS=Homo sapiens GN=H3F3A PE=2 SV=1	B4DEB1,P68431,P84243,Q16695,Q71DI3	Uniprot_human_V1.fasta	14052.9	0.999	1	1	4	0.000531	0.22
Cluster of ATP synthase subunit alpha OS=Homo sapiens GN=ATP5A1 PE=2 SV=1 (A8K092)	ATP synthase subunit alpha OS=Homo sapiens GN=ATP5A1 PE=2 SV=1	A8K092,P25705	Uniprot_human_V1.fasta	54495.1	1	4	4	4	0.000531	0.105
Cluster of Hemoglobin subunit beta OS=Homo sapiens GN=HBB PE=1 SV=2 (P68871)	Hemoglobin subunit delta OS=Homo sapiens GN=HBD PE=1 SV=2	P02042	Uniprot_human_V1.fasta	16055.2	0.999	1	1	5	0.000663	0.313
Cluster of Prelamin-A/C OS=Homo sapiens GN=LMNA PE=1 SV=1 (P02545)	Prelamin-A/C OS=Homo sapiens GN=LMNA PE=1 SV=1	P02545,P02545-2,P02545-3,Q6UYC3	Uniprot_human_V1.fasta	74140.7	1	8	8	8	0.00106	0.143
Cluster of Keratin, type II cytoskeletal 2 epidermal OS=Homo sapiens GN=KRT2 PE=1 SV=2 (P35908)	Keratin, type II cytoskeletal 6A OS=Homo sapiens GN=KRT6A PE=1 SV=3	P02538	Uniprot_human_V1.fasta	60046.4	1	5	5	13	0.00172	0.202
Cluster of Collagen alpha-1(III) chain OS=Homo sapiens GN=COL3A1 PE=1 SV=4 (P02461)	Collagen alpha-1(III) chain OS=Homo sapiens GN=COL3A1 PE=1 SV=4	P02461	Uniprot_human_V1.fasta	138565	1	2	3	3	0.000398	0.0239
Cluster of Trypstatin OS=Homo sapiens GN=AMBP PE=2 SV=1 (B7Z8R6)	Trypstatin OS=Homo sapiens GN=AMBP PE=2 SV=1	B7Z8R6,P02760	Uniprot_human_V1.fasta	29778.2	1	2	2	2	0.000265	0.115
Cluster of Extracellular superoxide dismutase [Cu-Zn] OS=Homo sapiens GN=SOD3 PE=1 SV=2 (P08294)	Extracellular superoxide dismutase [Cu-Zn] OS=Homo sapiens GN=SOD3 PE=1 SV=2	P08294	Uniprot_human_V1.fasta	25850.3	1	2	2	2	0.000265	0.1
Cluster of Haptoglobin beta chain (Fragment) OS=Homo sapiens GN=HP PE=3 SV=1 (J3QR68)	Haptoglobin beta chain (Fragment) OS=Homo sapiens GN=HP PE=3 SV=1	J3QR68,P00738,Q0VAC5	Uniprot_human_V1.fasta	45040.6	1	9	9	10	0.00133	0.257
Cluster of Collagen alpha-1(I) chain OS=Homo sapiens GN=COL1A1 PE=1 SV=5 (P02452)	Collagen alpha-1(I) chain OS=Homo sapiens GN=COL1A1 PE=1 SV=5	P02452	Uniprot_human_V1.fasta	138941	1	31	35	50	0.00663	0.312
Cluster of Desmoglein-1 OS=Homo sapiens GN=DSG1 PE=1 SV=2 (Q02413)	Desmoglein-1 OS=Homo sapiens GN=DSG1 PE=1 SV=2	Q02413	Uniprot_human_V1.fasta	113749	1	4	4	4	0.000531	0.0543
Cluster of Keratin, type I cytoskeletal 14 OS=Homo sapiens GN=KRT14 PE=1 SV=4 (P02533)	Keratin, type I cytoskeletal 16 OS=Homo sapiens GN=KRT16 PE=1 SV=4	P08779	Uniprot_human_V1.fasta	51269	1	3	3	10	0.00133	0.19
Cluster of Hemoglobin subunit alpha OS=Homo sapiens GN=HBA1 PE=1 SV=2 (P69905)	Hemoglobin subunit alpha OS=Homo sapiens GN=HBA1 PE=1 SV=2	P69905	Uniprot_human_V1.fasta	15257.6	1	6	6	8	0.00106	0.549
Cluster of NADH-cytochrome b5 reductase 3 OS=Homo sapiens GN=CYB5R3 PE=1 SV=3 (P00387)	NADH-cytochrome b5 reductase 3 OS=Homo sapiens GN=CYB5R3 PE=1 SV=3	P00387,P00387-2,P00387-3	Uniprot_human_V1.fasta	34236.3	1	2	2	2	0.000265	0.12
Cluster of Collagen alpha-1(VI) chain OS=Homo sapiens GN=COL6A1 PE=1 SV=3 (P12109)	Collagen alpha-1(VI) chain OS=Homo sapiens GN=COL6A1 PE=1 SV=3	P12109	Uniprot_human_V1.fasta	108531	1	5	5	8	0.00106	0.0623
Cluster of Protein S100-A9 OS=Homo sapiens GN=S100A9 PE=1 SV=1 (P06702)	Protein S100-A9 OS=Homo sapiens GN=S100A9 PE=1 SV=1	P06702	Uniprot_human_V1.fasta	13242.3	1	2	2	2	0.000265	0.175
Cluster of Collagen alpha-1(XIV) chain OS=Homo sapiens GN=COL14A1 PE=1 SV=3 (Q05707)	Collagen alpha-1(XIV) chain OS=Homo sapiens GN=COL14A1 PE=1 SV=3	Q05707,Q05707-2	Uniprot_human_V1.fasta	193516	1	21	21	22	0.00292	0.134
Cluster of Radixin OS=Homo sapiens GN=RDX PE=2 SV=1 (A7YIJ8)	Radixin OS=Homo sapiens GN=RDX PE=2 SV=1	A7YIJ8,E7EQR4,F5H1A7,P15311,P26038,P35241	Uniprot_human_V1.fasta	71050.6	1	2	2	2	0.000265	0.0315
Cluster of Ig kappa chain V-III region SIE OS=Homo sapiens PE=1 SV=1 (P01620)	Ig kappa chain V-III region SIE OS=Homo sapiens PE=1 SV=1	P01620,P01623	Uniprot_human_V1.fasta	11775.4	0.997	1	1	5	0.000663	0.459
Cluster of Ig kappa chain V-III region SIE OS=Homo sapiens PE=1 SV=1 (P01620)	Ig kappa chain V-III region Ti OS=Homo sapiens PE=1 SV=1	P01622	Uniprot_human_V1.fasta	11788.4	0.991	1	1	5	0.000663	0.459
Cluster of Gelsolin OS=Homo sapiens GN=GSN PE=4 SV=1 (F5H1A8)	Gelsolin OS=Homo sapiens GN=GSN PE=4 SV=1	F5H1A8,P06396,P06396-2,P06396-3,Q5T0H9	Uniprot_human_V1.fasta	81484.9	1	2	2	2	0.000265	0.0406
Cluster of Cathepsin G OS=Homo sapiens GN=CTSG PE=1 SV=2 (P08311)	Cathepsin G OS=Homo sapiens GN=CTSG PE=1 SV=2	P08311	Uniprot_human_V1.fasta	28837.5	1	6	6	6	0.000796	0.267
Cluster of Annexin OS=Homo sapiens GN=ANXA5 PE=3 SV=1 (D6RBL5)	Annexin OS=Homo sapiens GN=ANXA5 PE=3 SV=1	D6RBL5,P08758	Uniprot_human_V1.fasta	29338.8	1	3	3	3	0.000398	0.0885
Cluster of Ig kappa chain V-II region TEW OS=Homo sapiens PE=1 SV=1 (P01617)	Ig kappa chain V-II region TEW OS=Homo sapiens PE=1 SV=1	P01617	Uniprot_human_V1.fasta	12315.3	0.95	2	2	2	0.000265	0.327
Cluster of 60S ribosomal protein L13 OS=Homo sapiens GN=RPL13 PE=1 SV=4 (P26373)	60S ribosomal protein L13 OS=Homo sapiens GN=RPL13 PE=1 SV=4	P26373	Uniprot_human_V1.fasta	24262.2	0.998	3	3	3	0.000398	0.128
Cluster of Annexin A1 OS=Homo sapiens GN=ANXA1 PE=1 SV=2 (P04083)	Annexin A1 OS=Homo sapiens GN=ANXA1 PE=1 SV=2	P04083	Uniprot_human_V1.fasta	38715.9	0.998	2	2	2	0.000265	0.0636
Cluster of Fibrinogen alpha chain OS=Homo sapiens GN=FGA PE=1 SV=2 (P02671)	Fibrinogen alpha chain OS=Homo sapiens GN=FGA PE=1 SV=2	P02671,P02671-2	Uniprot_human_V1.fasta	94973.4	1	7	7	7	0.000928	0.0889
Cluster of Fibronectin OS=Homo sapiens GN=FN1 PE=4 SV=1 (E9PE77)	Fibronectin OS=Homo sapiens GN=FN1 PE=4 SV=1	E9PE77,F8W7G7,P02751,P02751-10,P02751-11,P02751-12,P02751-13,P02751-14,P02751-15,P02751-3,P02751-5,P02751-7,P02751-8,P02751-9	Uniprot_human_V1.fasta	256494	1	6	6	6	0.000796	0.0408
Cluster of Plasma cell-induced resident endoplasmic reticulum protein OS=Homo sapiens GN=PACAP PE=1 SV=1 (Q8WU39)	Plasma cell-induced resident endoplasmic reticulum protein OS=Homo sapiens GN=PACAP PE=1 SV=1	Q8WU39	Uniprot_human_V1.fasta	20694.6	1	2	2	2	0.000265	0.164
Cluster of Dolichyl-diphosphooligosaccharide--protein glycosyltransferase subunit 1 OS=Homo sapiens GN=RPN1 PE=2 SV=1 (B7Z4L4)	Dolichyl-diphosphooligosaccharide--protein glycosyltransferase subunit 1 OS=Homo sapiens GN=RPN1 PE=2 SV=1	B7Z4L4,P04843	Uniprot_human_V1.fasta	49922.7	1	2	2	2	0.000265	0.0552
Cluster of Filamin-A OS=Homo sapiens GN=FLNA PE=1 SV=4 (P21333)	Filamin-A OS=Homo sapiens GN=FLNA PE=1 SV=4	P21333,P21333-2,Q5HY54	Uniprot_human_V1.fasta	280729	1	4	4	4	0.000531	0.0196
Cluster of Plectin OS=Homo sapiens GN=PLEC PE=1 SV=3 (Q15149)	Plectin OS=Homo sapiens GN=PLEC PE=1 SV=3	Q15149,Q15149-2,Q15149-3,Q15149-4,Q15149-5,Q15149-6,Q15149-7,Q15149-8,Q15149-9	Uniprot_human_V1.fasta	531784	1	6	6	6	0.000796	0.0141
Cluster of Tubulin alpha-1B chain OS=Homo sapiens GN=TUBA1B PE=1 SV=1 (P68363)	Tubulin alpha-1A chain OS=Homo sapiens GN=TUBA1A PE=3 SV=1	G3V1U9,Q71U36	Uniprot_human_V1.fasta	46297.5	1	1	1	6	0.000796	0.214
Cluster of Histone H3 OS=Homo sapiens GN=H3F3A PE=2 SV=1 (B4DEB1)	Histone H3 OS=Homo sapiens GN=HIST2H3PS2 PE=3 SV=1	Q5TEC6	Uniprot_human_V1.fasta	15430.7	0.993	1	1	4	0.000531	0.199
Cluster of ATP synthase subunit beta OS=Homo sapiens GN=ATP5B PE=3 SV=1 (F8VPV9)	ATP synthase subunit beta OS=Homo sapiens GN=ATP5B PE=3 SV=1	F8VPV9,P06576	Uniprot_human_V1.fasta	55309.1	1	1	1	5	0.000663	0.133
Cluster of Endoplasmin OS=Homo sapiens GN=HSP90B1 PE=1 SV=1 (P14625)	Endoplasmin OS=Homo sapiens GN=HSP90B1 PE=1 SV=1	P14625	Uniprot_human_V1.fasta	92471.7	0.999	4	4	4	0.000531	0.0461
Cluster of Desmoplakin OS=Homo sapiens GN=DSP PE=1 SV=3 (P15924)	Desmoplakin OS=Homo sapiens GN=DSP PE=1 SV=3	P15924	Uniprot_human_V1.fasta	331781	1	5	5	5	0.000663	0.0181
Cluster of Heat shock protein HSP 90-beta OS=Homo sapiens GN=HSP90AB1 PE=1 SV=4 (P08238)	Heat shock protein HSP 90-beta OS=Homo sapiens GN=HSP90AB1 PE=1 SV=4	P08238	Uniprot_human_V1.fasta	83267.3	0.981	3	3	4	0.000531	0.0442
Cluster of Biglycan OS=Homo sapiens GN=BGN PE=2 SV=1 (A6NLG9)	Biglycan OS=Homo sapiens GN=BGN PE=2 SV=1	A6NLG9,P21810	Uniprot_human_V1.fasta	34877.2	1	6	7	10	0.00133	0.218
Cluster of Ferritin light chain OS=Homo sapiens GN=FTL PE=1 SV=2 (P02792)	Ferritin light chain OS=Homo sapiens GN=FTL PE=1 SV=2	P02792	Uniprot_human_V1.fasta	20020.6	0.991	2	2	2	0.000265	0.126
Cluster of Hemopexin OS=Homo sapiens GN=HPX PE=1 SV=2 (P02790)	Hemopexin OS=Homo sapiens GN=HPX PE=1 SV=2	P02790	Uniprot_human_V1.fasta	51676.5	1	2	2	2	0.000265	0.0758
Cluster of Vimentin OS=Homo sapiens GN=VIM PE=1 SV=4 (P08670)	Vimentin OS=Homo sapiens GN=VIM PE=1 SV=4	P08670	Uniprot_human_V1.fasta	53652.7	1	28	31	32	0.00424	0.577
Cluster of Pyruvate kinase isozymes M1/M2 OS=Homo sapiens GN=PKM PE=1 SV=4 (P14618)	Pyruvate kinase isozymes M1/M2 OS=Homo sapiens GN=PKM PE=1 SV=4	P14618,P14618-3	Uniprot_human_V1.fasta	57937.5	0.999	3	4	4	0.000531	0.117
Cluster of Serotransferrin OS=Homo sapiens GN=TF PE=1 SV=3 (P02787)	Serotransferrin OS=Homo sapiens GN=TF PE=1 SV=3	P02787	Uniprot_human_V1.fasta	77064.3	1	7	7	7	0.000928	0.125
Cluster of Heat shock cognate 71 kDa protein OS=Homo sapiens GN=HSPA8 PE=3 SV=1 (E9PKE3)	Heat shock cognate 71 kDa protein OS=Homo sapiens GN=HSPA8 PE=3 SV=1	E9PKE3,P11142,P11142-2	Uniprot_human_V1.fasta	68807.7	1	2	2	3	0.000398	0.0638

## Sheet: training-8
Cluster	Protein name	Protein accession numbers	Database sources	Protein molecular weight (Da)	Protein identification probability	Exclusive unique peptide count	Exclusive unique spectrum count	Total spectrum count	Percentage of total spectra	Percentage sequence coverage
Cluster of Fibrinogen beta chain OS=Homo sapiens GN=FGB PE=1 SV=2 (P02675)	Fibrinogen beta chain OS=Homo sapiens GN=FGB PE=1 SV=2	P02675	Uniprot_human_V1.fasta	55928.6	1	4	4	4	0.000538	0.0794
Cluster of Biglycan OS=Homo sapiens GN=BGN PE=2 SV=1 (A6NLG9)	Biglycan OS=Homo sapiens GN=BGN PE=2 SV=1	A6NLG9,P21810	Uniprot_human_V1.fasta	34877.2	1	3	3	3	0.000403	0.101
Cluster of ATP synthase subunit alpha, mitochondrial OS=Homo sapiens GN=ATP5A1 PE=1 SV=1 (P25705)	ATP synthase subunit alpha, mitochondrial OS=Homo sapiens GN=ATP5A1 PE=1 SV=1	P25705	Uniprot_human_V1.fasta	59752.1	1	7	7	7	0.000941	0.128
Cluster of Prolargin OS=Homo sapiens GN=PRELP PE=1 SV=1 (P51888)	Prolargin OS=Homo sapiens GN=PRELP PE=1 SV=1	P51888	Uniprot_human_V1.fasta	43812.4	1	5	5	5	0.000672	0.107
Cluster of Lumican OS=Homo sapiens GN=LUM PE=1 SV=2 (P51884)	Lumican OS=Homo sapiens GN=LUM PE=1 SV=2	P51884	Uniprot_human_V1.fasta	38431.5	1	2	3	3	0.000403	0.068
Cluster of Tubulin beta-4B chain OS=Homo sapiens GN=TUBB4B PE=1 SV=1 (P68371)	Tubulin beta chain OS=Homo sapiens GN=TUBB PE=4 SV=1	E7EWR1,F8VUJ7,F8VW92,F8VYX6,P07437	Uniprot_human_V1.fasta	39727.7	0.993	1	1	7	0.000941	0.198
Cluster of Tripartite motif-containing protein 29 OS=Homo sapiens GN=TRIM29 PE=1 SV=2 (Q14134)	Tripartite motif-containing protein 29 OS=Homo sapiens GN=TRIM29 PE=1 SV=2	Q14134,Q14134-2	Uniprot_human_V1.fasta	65835.7	0.997	3	3	3	0.000403	0.0459
Cluster of Nucleolin OS=Homo sapiens GN=NCL PE=1 SV=3 (P19338)	Nucleolin OS=Homo sapiens GN=NCL PE=1 SV=3	P19338	Uniprot_human_V1.fasta	76615.9	1	4	4	4	0.000538	0.0465
Cluster of Chymase OS=Homo sapiens GN=CMA1 PE=1 SV=1 (P23946)	Chymase OS=Homo sapiens GN=CMA1 PE=1 SV=1	P23946	Uniprot_human_V1.fasta	27325.5	0.987	2	2	2	0.000269	0.101
Cluster of Glyceraldehyde-3-phosphate dehydrogenase OS=Homo sapiens GN=GAPDH PE=1 SV=3 (P04406)	Glyceraldehyde-3-phosphate dehydrogenase OS=Homo sapiens GN=GAPDH PE=1 SV=3	P04406	Uniprot_human_V1.fasta	36053.4	1	8	8	8	0.00108	0.269
Cluster of Hemoglobin subunit alpha OS=Homo sapiens GN=HBA1 PE=1 SV=2 (P69905)	Hemoglobin subunit alpha OS=Homo sapiens GN=HBA1 PE=1 SV=2	P69905	Uniprot_human_V1.fasta	15257.6	1	4	5	7	0.000941	0.345
Cluster of Fatty acid-binding protein, epidermal OS=Homo sapiens GN=FABP5 PE=4 SV=1 (I6L8B7)	Fatty acid-binding protein, epidermal OS=Homo sapiens GN=FABP5 PE=4 SV=1	I6L8B7,Q01469	Uniprot_human_V1.fasta	11256.7	1	2	3	3	0.000403	0.337
Cluster of Desmoplakin OS=Homo sapiens GN=DSP PE=1 SV=3 (P15924)	Desmoplakin OS=Homo sapiens GN=DSP PE=1 SV=3	P15924	Uniprot_human_V1.fasta	331781	1	11	11	12	0.00161	0.0383
Cluster of Heat shock protein beta-1 OS=Homo sapiens GN=HSPB1 PE=1 SV=2 (P04792)	Heat shock protein beta-1 OS=Homo sapiens GN=HSPB1 PE=1 SV=2	P04792	Uniprot_human_V1.fasta	22782.6	1	8	8	8	0.00108	0.532
Cluster of Actin, cytoplasmic 1 OS=Homo sapiens GN=ACTB PE=1 SV=1 (P60709)	Actin, gamma-enteric smooth muscle OS=Homo sapiens GN=ACTG2 PE=3 SV=1	E9PG30,P62736,P63267,P68032	Uniprot_human_V1.fasta	37084.5	0.999	1	1	10	0.00134	0.21
Cluster of Histone H3.1 OS=Homo sapiens GN=HIST1H3A PE=1 SV=2 (P68431)	Histone H3.1 OS=Homo sapiens GN=HIST1H3A PE=1 SV=2	P68431,P84243,Q16695,Q71DI3	Uniprot_human_V1.fasta	15404.7	0.999	1	1	5	0.000672	0.235
Cluster of Apolipoprotein E OS=Homo sapiens GN=APOE PE=1 SV=1 (P02649)	Apolipoprotein E OS=Homo sapiens GN=APOE PE=1 SV=1	P02649	Uniprot_human_V1.fasta	36153.5	1	7	7	7	0.000941	0.183
Cluster of Truncated apolipoprotein A-I OS=Homo sapiens GN=APOA1 PE=4 SV=1 (F8W696)	Truncated apolipoprotein A-I OS=Homo sapiens GN=APOA1 PE=4 SV=1	F8W696,P02647	Uniprot_human_V1.fasta	27909.5	1	3	3	3	0.000403	0.118
Cluster of Serine protease HTRA1 (Fragment) OS=Homo sapiens GN=HTRA1 PE=4 SV=1 (H0Y7G9)	Serine protease HTRA1 (Fragment) OS=Homo sapiens GN=HTRA1 PE=4 SV=1	H0Y7G9,Q92743	Uniprot_human_V1.fasta	23852.3	0.998	2	2	2	0.000269	0.095
Cluster of Actin, cytoplasmic 1 OS=Homo sapiens GN=ACTB PE=1 SV=1 (P60709)	Actin, cytoplasmic 1 OS=Homo sapiens GN=ACTB PE=1 SV=1	P60709,P63261	Uniprot_human_V1.fasta	41737.8	1	3	3	13	0.00175	0.261
Cluster of Clusterin OS=Homo sapiens GN=CLU PE=1 SV=1 (P10909)	Clusterin OS=Homo sapiens GN=CLU PE=1 SV=1	P10909,P10909-2,P10909-4,P10909-5	Uniprot_human_V1.fasta	52495	1	3	3	3	0.000403	0.098
Cluster of Vimentin OS=Homo sapiens GN=VIM PE=1 SV=4 (P08670)	Vimentin OS=Homo sapiens GN=VIM PE=1 SV=4	P08670	Uniprot_human_V1.fasta	53652.7	1	14	14	14	0.00188	0.352
Cluster of Heat shock 70 kDa protein 1A/1B OS=Homo sapiens GN=HSPA1A PE=1 SV=5 (P08107)	78 kDa glucose-regulated protein OS=Homo sapiens GN=HSPA5 PE=1 SV=2	P11021	Uniprot_human_V1.fasta	72334.7	1	5	5	6	0.000807	0.11
Cluster of 10 kDa heat shock protein, mitochondrial OS=Homo sapiens GN=HSPE1 PE=3 SV=1 (B8ZZL8)	10 kDa heat shock protein, mitochondrial OS=Homo sapiens GN=HSPE1 PE=3 SV=1	B8ZZL8,P61604	Uniprot_human_V1.fasta	10689.4	0.994	2	2	2	0.000269	0.168
Cluster of Alpha-2-macroglobulin-like protein 1 OS=Homo sapiens GN=A2ML1 PE=1 SV=3 (A8K2U0)	Alpha-2-macroglobulin-like protein 1 OS=Homo sapiens GN=A2ML1 PE=1 SV=3	A8K2U0	Uniprot_human_V1.fasta	161108	1	5	5	5	0.000672	0.0365
Cluster of Guanine nucleotide-binding protein subunit beta-2-like 1 OS=Homo sapiens GN=GNB2L1 PE=1 SV=3 (P63244)	Guanine nucleotide-binding protein subunit beta-2-like 1 OS=Homo sapiens GN=GNB2L1 PE=1 SV=3	P63244	Uniprot_human_V1.fasta	35077	1	2	2	2	0.000269	0.0883
Cluster of 60S acidic ribosomal protein P0 (Fragment) OS=Homo sapiens GN=RPLP0 PE=3 SV=1 (F8VPE8)	60S acidic ribosomal protein P0 (Fragment) OS=Homo sapiens GN=RPLP0 PE=3 SV=1	F8VPE8,F8VU65,F8VW21,F8VWS0,G3V210,P05388,Q3B7A4,Q8NHW5	Uniprot_human_V1.fasta	16681.1	0.986	2	2	2	0.000269	0.15
Cluster of Keratin, type II cytoskeletal 2 epidermal OS=Homo sapiens GN=KRT2 PE=1 SV=2 (P35908)	Keratin, type II cytoskeletal 5 OS=Homo sapiens GN=KRT5 PE=1 SV=3	P13647	Uniprot_human_V1.fasta	62379.6	1	18	19	32	0.0043	0.383
Cluster of Keratin, type I cytoskeletal 10 OS=Homo sapiens GN=KRT10 PE=1 SV=6 (P13645)	Keratin, type I cytoskeletal 13 OS=Homo sapiens GN=KRT13 PE=1 SV=4	P13646	Uniprot_human_V1.fasta	49589.3	1	10	10	25	0.00336	0.43
Cluster of Keratin, type I cytoskeletal 10 OS=Homo sapiens GN=KRT10 PE=1 SV=6 (P13645)	Keratin, type I cytoskeletal 10 OS=Homo sapiens GN=KRT10 PE=1 SV=6	P13645	Uniprot_human_V1.fasta	58828.8	1	19	20	40	0.00538	0.43
Cluster of Peroxiredoxin-6 OS=Homo sapiens GN=PRDX6 PE=1 SV=3 (P30041)	Peroxiredoxin-6 OS=Homo sapiens GN=PRDX6 PE=1 SV=3	P30041	Uniprot_human_V1.fasta	25036.1	1	3	3	3	0.000403	0.147
Cluster of Keratin, type II cytoskeletal 78 OS=Homo sapiens GN=KRT78 PE=2 SV=2 (Q8N1N4)	Keratin, type II cytoskeletal 78 OS=Homo sapiens GN=KRT78 PE=2 SV=2	Q8N1N4	Uniprot_human_V1.fasta	56866.4	1	2	2	2	0.000269	0.0404
Cluster of Keratin, type II cytoskeletal 2 epidermal OS=Homo sapiens GN=KRT2 PE=1 SV=2 (P35908)	Keratin, type II cytoskeletal 6B OS=Homo sapiens GN=KRT6B PE=1 SV=5	P04259	Uniprot_human_V1.fasta	60068.6	1	2	2	29	0.0039	0.326
Cluster of Elongation factor 2 OS=Homo sapiens GN=EEF2 PE=1 SV=4 (P13639)	Elongation factor 2 OS=Homo sapiens GN=EEF2 PE=1 SV=4	P13639	Uniprot_human_V1.fasta	95340.1	1	4	4	4	0.000538	0.049
Cluster of Mimecan OS=Homo sapiens GN=OGN PE=1 SV=1 (P20774)	Mimecan OS=Homo sapiens GN=OGN PE=1 SV=1	P20774	Uniprot_human_V1.fasta	33925	1	5	5	5	0.000672	0.141
Cluster of Carbonyl reductase [NADPH] 1 OS=Homo sapiens GN=CBR1 PE=1 SV=3 (P16152)	Carbonyl reductase [NADPH] 1 OS=Homo sapiens GN=CBR1 PE=1 SV=3	P16152	Uniprot_human_V1.fasta	30374.8	1	3	3	3	0.000403	0.13
Cluster of Keratinocyte proline-rich protein OS=Homo sapiens GN=KPRP PE=1 SV=1 (Q5T749)	Keratinocyte proline-rich protein OS=Homo sapiens GN=KPRP PE=1 SV=1	Q5T749	Uniprot_human_V1.fasta	64132.6	0.936	2	2	2	0.000269	0.0518
Cluster of Histone H2A type 1 OS=Homo sapiens GN=HIST1H2AG PE=1 SV=2 (P0C0S8)	Histone H2A type 1 OS=Homo sapiens GN=HIST1H2AG PE=1 SV=2	P0C0S8,P20671,Q16777,Q6FI13,Q96KK5,Q99878,Q9BTM1,Q9BTM1-2	Uniprot_human_V1.fasta	14092.1	0.999	1	1	3	0.000403	0.208
Cluster of Hemoglobin subunit beta OS=Homo sapiens GN=HBB PE=1 SV=2 (P68871)	Hemoglobin subunit beta OS=Homo sapiens GN=HBB PE=1 SV=2	P68871	Uniprot_human_V1.fasta	15998	1	4	4	9	0.00121	0.51
Cluster of Peptidyl-prolyl cis-trans isomerase B OS=Homo sapiens GN=PPIB PE=1 SV=2 (P23284)	Peptidyl-prolyl cis-trans isomerase B OS=Homo sapiens GN=PPIB PE=1 SV=2	P23284	Uniprot_human_V1.fasta	23743.2	0.966	2	2	2	0.000269	0.0694
Cluster of Collagen alpha-3(VI) chain OS=Homo sapiens GN=COL6A3 PE=4 SV=1 (E9PCV6)	Collagen alpha-3(VI) chain OS=Homo sapiens GN=COL6A3 PE=4 SV=1	E9PCV6,P12111,P12111-2	Uniprot_human_V1.fasta	321999	1	42	45	49	0.00659	0.155
Cluster of Voltage-dependent anion-selective channel protein 2 OS=Homo sapiens GN=VDAC2 PE=2 SV=1 (B4DKM5)	Voltage-dependent anion-selective channel protein 2 OS=Homo sapiens GN=VDAC2 PE=2 SV=1	B4DKM5,P45880,P45880-1,P45880-2	Uniprot_human_V1.fasta	27479.3	0.996	2	2	2	0.000269	0.125
Cluster of Cornulin OS=Homo sapiens GN=CRNN PE=1 SV=1 (Q9UBG3)	Cornulin OS=Homo sapiens GN=CRNN PE=1 SV=1	Q9UBG3	Uniprot_human_V1.fasta	53530.1	0.999	3	3	3	0.000403	0.129
Cluster of Collagen alpha-2(I) chain OS=Homo sapiens GN=COL1A2 PE=1 SV=7 (P08123)	Collagen alpha-2(I) chain OS=Homo sapiens GN=COL1A2 PE=1 SV=7	P08123	Uniprot_human_V1.fasta	129315	1	4	5	7	0.000941	0.0366
Cluster of Tubulin alpha-1C chain OS=Homo sapiens GN=TUBA1C PE=3 SV=1 (F5H5D3)	Tubulin alpha-4A chain OS=Homo sapiens GN=TUBA4A PE=2 SV=1	A8MUB1,P68366	Uniprot_human_V1.fasta	48329	0.693	1	1	5	0.000672	0.157
Cluster of Vitronectin OS=Homo sapiens GN=VTN PE=1 SV=1 (P04004)	Vitronectin OS=Homo sapiens GN=VTN PE=1 SV=1	P04004	Uniprot_human_V1.fasta	54306.1	0.999	4	4	4	0.000538	0.0732
Cluster of Keratin, type II cytoskeletal 1 OS=Homo sapiens GN=KRT1 PE=1 SV=6 (P04264)	Keratin, type II cytoskeletal 1 OS=Homo sapiens GN=KRT1 PE=1 SV=6	P04264	Uniprot_human_V1.fasta	66040.3	1	29	37	66	0.00887	0.54
Cluster of Ubiquitin OS=Homo sapiens GN=UBB PE=2 SV=1 (B4DV12)	Ubiquitin OS=Homo sapiens GN=UBB PE=2 SV=1	B4DV12,F5GXK7,F5GYU3,F5H041,F5H265,F5H2Z3,F5H388,F5H6Q2,F5H747,F5H7K6,F5H7Y5,J3QKN0,J3QLP7,J3QRK5,J3QS39,J3QTR3,P0CG47,P0CG48,P62979,P62987,Q96C32	Uniprot_human_V1.fasta	17215.6	1	2	2	2	0.000269	0.163
Cluster of Profilin-1 OS=Homo sapiens GN=PFN1 PE=1 SV=2 (P07737)	Profilin-1 OS=Homo sapiens GN=PFN1 PE=1 SV=2	P07737	Uniprot_human_V1.fasta	15054.3	1	4	4	5	0.000672	0.414
Cluster of Uromodulin OS=Homo sapiens GN=UMOD PE=4 SV=1 (E9PEA4)	Uromodulin OS=Homo sapiens GN=UMOD PE=4 SV=1	E9PEA4,P07911,P07911-2,P07911-3,P07911-4	Uniprot_human_V1.fasta	73569.6	0.998	3	3	3	0.000403	0.0386
Cluster of Galectin-1 OS=Homo sapiens GN=LGALS1 PE=1 SV=2 (P09382)	Galectin-1 OS=Homo sapiens GN=LGALS1 PE=1 SV=2	P09382	Uniprot_human_V1.fasta	14715.8	0.96	2	2	2	0.000269	0.2
Cluster of Heat shock 70 kDa protein 1A/1B OS=Homo sapiens GN=HSPA1A PE=1 SV=5 (P08107)	Heat shock 70 kDa protein 1A/1B OS=Homo sapiens GN=HSPA1A PE=1 SV=5	P08107	Uniprot_human_V1.fasta	70054	1	5	5	6	0.000807	0.122
Cluster of Protein S100-A8 OS=Homo sapiens GN=S100A8 PE=1 SV=1 (P05109)	Protein S100-A8 OS=Homo sapiens GN=S100A8 PE=1 SV=1	P05109	Uniprot_human_V1.fasta	10835	1	2	2	2	0.000269	0.204
Cluster of Keratin, type I cytoskeletal 10 OS=Homo sapiens GN=KRT10 PE=1 SV=6 (P13645)	Junction plakoglobin OS=Homo sapiens GN=JUP PE=3 SV=1	F5GWP8	Uniprot_human_V1.fasta	66351.2	1	4	4	19	0.00255	0.291
Cluster of Histone H4 OS=Homo sapiens GN=HIST1H4A PE=1 SV=2 (P62805)	Histone H4 OS=Homo sapiens GN=HIST1H4A PE=1 SV=2	P62805	Uniprot_human_V1.fasta	11367.7	1	2	2	2	0.000269	0.243
Cluster of Histone H3.1 OS=Homo sapiens GN=HIST1H3A PE=1 SV=2 (P68431)	Histone H3 OS=Homo sapiens GN=HIST2H3PS2 PE=3 SV=1	Q5TEC6	Uniprot_human_V1.fasta	15430.7	0.322	1	1	5	0.000672	0.265
Cluster of Ras-related protein Rab-1B OS=Homo sapiens GN=RAB1B PE=1 SV=1 (Q9H0U4)	Ras-related protein Rab-1B OS=Homo sapiens GN=RAB1B PE=1 SV=1	Q9H0U4	Uniprot_human_V1.fasta	22172	0.998	2	2	2	0.000269	0.129
Cluster of Collagen alpha-1(I) chain OS=Homo sapiens GN=COL1A1 PE=1 SV=5 (P02452)	Collagen alpha-1(I) chain OS=Homo sapiens GN=COL1A1 PE=1 SV=5	P02452	Uniprot_human_V1.fasta	138941	1	8	8	9	0.00121	0.0867
Cluster of Small proline-rich protein 3 (Fragment) OS=Homo sapiens GN=SPRR3 PE=4 SV=1 (B1AN48)	Small proline-rich protein 3 (Fragment) OS=Homo sapiens GN=SPRR3 PE=4 SV=1	B1AN48,F5GZ12,Q9UBC9	Uniprot_human_V1.fasta	17057.7	1	4	4	4	0.000538	0.346
Cluster of Plakophilin-1 OS=Homo sapiens GN=PKP1 PE=1 SV=2 (Q13835)	Plakophilin-1 OS=Homo sapiens GN=PKP1 PE=1 SV=2	Q13835,Q13835-2	Uniprot_human_V1.fasta	82862.7	1	3	3	3	0.000403	0.0469
Cluster of Ras-related protein Rab-11A OS=Homo sapiens GN=RAB11A PE=2 SV=1 (B4DT13)	Ras-related protein Rab-11A OS=Homo sapiens GN=RAB11A PE=2 SV=1	B4DT13,H3BMH2,H3BSC1,J3KQP6,P62491,Q15907	Uniprot_human_V1.fasta	17659.4	0.991	2	2	2	0.000269	0.135
Cluster of Elastin OS=Homo sapiens GN=ELN PE=4 SV=1 (E7EN65)	Elastin OS=Homo sapiens GN=ELN PE=4 SV=1	E7EN65,E7ENM0,E9PBM4,P15502-1,P15502-2,P15502-4,P15502-5	Uniprot_human_V1.fasta	61921.5	1	3	3	3	0.000403	0.063
Cluster of Peroxiredoxin-1 OS=Homo sapiens GN=PRDX1 PE=1 SV=1 (Q06830)	Peroxiredoxin-2 OS=Homo sapiens GN=PRDX2 PE=1 SV=5	P32119	Uniprot_human_V1.fasta	21892.4	0.974	1	1	2	0.000269	0.101
Cluster of Annexin A1 OS=Homo sapiens GN=ANXA1 PE=1 SV=2 (P04083)	Annexin A1 OS=Homo sapiens GN=ANXA1 PE=1 SV=2	P04083	Uniprot_human_V1.fasta	38715.9	1	14	14	14	0.00188	0.413
Cluster of Fibrinogen alpha chain OS=Homo sapiens GN=FGA PE=1 SV=2 (P02671)	Fibrinogen alpha chain OS=Homo sapiens GN=FGA PE=1 SV=2	P02671,P02671-2	Uniprot_human_V1.fasta	94973.4	1	5	5	5	0.000672	0.0681
Cluster of Fibronectin OS=Homo sapiens GN=FN1 PE=4 SV=1 (E9PE77)	Fibronectin OS=Homo sapiens GN=FN1 PE=4 SV=1	E9PE77,F8W7G7,P02751,P02751-10,P02751-11,P02751-12,P02751-13,P02751-14,P02751-15,P02751-3,P02751-5,P02751-7,P02751-8,P02751-9	Uniprot_human_V1.fasta	256494	1	4	4	4	0.000538	0.0215
Cluster of Interleukin-1 receptor antagonist protein OS=Homo sapiens GN=IL1RN PE=1 SV=1 (P18510)	Interleukin-1 receptor antagonist protein OS=Homo sapiens GN=IL1RN PE=1 SV=1	P18510,P18510-2,P18510-3,P18510-4	Uniprot_human_V1.fasta	20055.4	1	3	3	3	0.000403	0.153
Cluster of Cystatin-A OS=Homo sapiens GN=CSTA PE=1 SV=1 (P01040)	Cystatin-A OS=Homo sapiens GN=CSTA PE=1 SV=1	P01040	Uniprot_human_V1.fasta	11006.6	1	3	3	3	0.000403	0.398
Cluster of Tenascin OS=Homo sapiens GN=TNC PE=4 SV=1 (E9PC84)	Tenascin OS=Homo sapiens GN=TNC PE=4 SV=1	E9PC84,F5H7V9,J3QSU6,P24821,P24821-2,P24821-3,P24821-4,P24821-5,P24821-6	Uniprot_human_V1.fasta	210850	1	3	3	3	0.000403	0.0156
Cluster of Thymidine phosphorylase (Fragment) OS=Homo sapiens GN=TYMP PE=4 SV=1 (C9JGI3)	Thymidine phosphorylase (Fragment) OS=Homo sapiens GN=TYMP PE=4 SV=1	C9JGI3,H9KVA0,P19971	Uniprot_human_V1.fasta	46087.4	0.869	2	2	2	0.000269	0.0449
Cluster of Mast cell carboxypeptidase A OS=Homo sapiens GN=CPA3 PE=1 SV=2 (P15088)	Mast cell carboxypeptidase A OS=Homo sapiens GN=CPA3 PE=1 SV=2	P15088	Uniprot_human_V1.fasta	48671.8	1	2	2	2	0.000269	0.0552
Cluster of Eukaryotic initiation factor 4A-II OS=Homo sapiens GN=EIF4A2 PE=3 SV=1 (E7EQG2)	Eukaryotic initiation factor 4A-II OS=Homo sapiens GN=EIF4A2 PE=3 SV=1	E7EQG2,P60842,Q14240,Q14240-2,Q9NZE6	Uniprot_human_V1.fasta	41291.6	1	2	2	2	0.000269	0.047
Cluster of Tubulin polymerization-promoting protein family member 3 OS=Homo sapiens GN=TPPP3 PE=1 SV=1 (Q9BW30)	Tubulin polymerization-promoting protein family member 3 OS=Homo sapiens GN=TPPP3 PE=1 SV=1	Q9BW30	Uniprot_human_V1.fasta	18985.9	0.999	2	2	2	0.000269	0.153
Cluster of SERPINB12 protein OS=Homo sapiens GN=SERPINB12 PE=2 SV=1 (Q3SYB4)	SERPINB12 protein OS=Homo sapiens GN=SERPINB12 PE=2 SV=1	Q3SYB4,Q96P63	Uniprot_human_V1.fasta	48447.1	0.972	2	2	2	0.000269	0.0588
Cluster of Serotransferrin OS=Homo sapiens GN=TF PE=1 SV=3 (P02787)	Serotransferrin OS=Homo sapiens GN=TF PE=1 SV=3	P02787	Uniprot_human_V1.fasta	77064.3	1	3	3	3	0.000403	0.0544
Cluster of Alpha-1-antitrypsin OS=Homo sapiens GN=SERPINA1 PE=1 SV=3 (P01009)	Alpha-1-antitrypsin OS=Homo sapiens GN=SERPINA1 PE=1 SV=3	P01009	Uniprot_human_V1.fasta	46737.9	0.999	2	2	2	0.000269	0.0742
Cluster of Serum albumin OS=Homo sapiens GN=ALB PE=1 SV=2 (P02768)	Serum albumin OS=Homo sapiens GN=ALB PE=1 SV=2	P02768	Uniprot_human_V1.fasta	69366.9	1	18	18	21	0.00282	0.273
Cluster of Collagen alpha-1(XIV) chain OS=Homo sapiens GN=COL14A1 PE=1 SV=3 (Q05707)	Collagen alpha-1(XIV) chain OS=Homo sapiens GN=COL14A1 PE=1 SV=3	Q05707,Q05707-2	Uniprot_human_V1.fasta	193516	1	5	5	5	0.000672	0.0373
Cluster of Transforming growth factor-beta-induced protein ig-h3 OS=Homo sapiens GN=TGFBI PE=4 SV=1 (G8JLA8)	Transforming growth factor-beta-induced protein ig-h3 OS=Homo sapiens GN=TGFBI PE=4 SV=1	G8JLA8,Q15582	Uniprot_human_V1.fasta	74695.8	0.999	3	3	3	0.000403	0.0498
Cluster of Peroxiredoxin-1 OS=Homo sapiens GN=PRDX1 PE=1 SV=1 (Q06830)	Peroxiredoxin-1 OS=Homo sapiens GN=PRDX1 PE=1 SV=1	Q06830	Uniprot_human_V1.fasta	22110.9	1	5	5	7	0.000941	0.327
Cluster of Heat shock 70 kDa protein 1A/1B OS=Homo sapiens GN=HSPA1A PE=1 SV=5 (P08107)	Heat shock cognate 71 kDa protein OS=Homo sapiens GN=HSPA8 PE=3 SV=1	E9PKE3,P11142	Uniprot_human_V1.fasta	68807.7	1	4	4	5	0.000672	0.0973
Cluster of Ig alpha-1 chain C region OS=Homo sapiens GN=IGHA1 PE=1 SV=2 (P01876)	Ig alpha-1 chain C region OS=Homo sapiens GN=IGHA1 PE=1 SV=2	P01876	Uniprot_human_V1.fasta	37653.8	1	3	3	3	0.000403	0.0963
Cluster of Complement component C9 OS=Homo sapiens GN=C9 PE=1 SV=2 (P02748)	Complement component C9 OS=Homo sapiens GN=C9 PE=1 SV=2	P02748	Uniprot_human_V1.fasta	63174.9	1	6	6	7	0.000941	0.111
Cluster of Serum amyloid P-component OS=Homo sapiens GN=APCS PE=1 SV=2 (P02743)	Serum amyloid P-component OS=Homo sapiens GN=APCS PE=1 SV=2	P02743	Uniprot_human_V1.fasta	25387.7	1	4	4	4	0.000538	0.179
Cluster of Heat shock protein HSP 90-alpha OS=Homo sapiens GN=HSP90AA1 PE=1 SV=5 (P07900)	Heat shock protein HSP 90-alpha OS=Homo sapiens GN=HSP90AA1 PE=1 SV=5	P07900,P07900-2	Uniprot_human_V1.fasta	84663.2	0.972	1	1	3	0.000403	0.0383
Cluster of Keratin, type I cytoskeletal 10 OS=Homo sapiens GN=KRT10 PE=1 SV=6 (P13645)	Keratin, type I cytoskeletal 16 OS=Homo sapiens GN=KRT16 PE=1 SV=4	P08779	Uniprot_human_V1.fasta	51269	1	10	10	27	0.00363	0.476
Cluster of Ig gamma-3 chain C region OS=Homo sapiens GN=IGHG3 PE=1 SV=2 (P01860)	Ig gamma-3 chain C region OS=Homo sapiens GN=IGHG3 PE=1 SV=2	P01860	Uniprot_human_V1.fasta	41285.9	1	2	2	5	0.000672	0.141
Cluster of CD44 antigen OS=Homo sapiens GN=CD44 PE=4 SV=2 (E7EPC6)	CD44 antigen OS=Homo sapiens GN=CD44 PE=4 SV=2	E7EPC6,H0Y2P0,H0Y5E4,H0YCV9,H0YD13,H0YD17,H0YDW7,H0YDX6,P16070,P16070-10,P16070-11,P16070-12,P16070-13,P16070-14,P16070-15,P16070-16,P16070-17,P16070-18,P16070-3,P16070-4,P16070-5,P16070-6,P16070-7,P16070-8,P16070-9	Uniprot_human_V1.fasta	78516.5	1	2	2	2	0.000269	0.0308
Cluster of Band 3 anion transport protein OS=Homo sapiens GN=SLC4A1 PE=1 SV=3 (P02730)	Band 3 anion transport protein OS=Homo sapiens GN=SLC4A1 PE=1 SV=3	P02730	Uniprot_human_V1.fasta	101796	1	3	4	4	0.000538	0.0395
Cluster of Fibrinogen gamma chain OS=Homo sapiens GN=FGG PE=4 SV=1 (C9JC84)	Fibrinogen gamma chain OS=Homo sapiens GN=FGG PE=4 SV=1	C9JC84,C9JEU5,P02679,P02679-2	Uniprot_human_V1.fasta	52339.2	0.992	4	4	5	0.000672	0.0759
Cluster of Ig gamma-3 chain C region OS=Homo sapiens GN=IGHG3 PE=1 SV=2 (P01860)	Ig gamma-1 chain C region OS=Homo sapiens GN=IGHG1 PE=1 SV=1	P01857	Uniprot_human_V1.fasta	36105	0.999	2	2	5	0.000672	0.182
Cluster of Desmoglein-1 OS=Homo sapiens GN=DSG1 PE=1 SV=2 (Q02413)	Desmoglein-1 OS=Homo sapiens GN=DSG1 PE=1 SV=2	Q02413	Uniprot_human_V1.fasta	113749	1	7	7	7	0.000941	0.0896
Cluster of Peptidyl-prolyl cis-trans isomerase A OS=Homo sapiens GN=PPIA PE=1 SV=2 (P62937)	Peptidyl-prolyl cis-trans isomerase A OS=Homo sapiens GN=PPIA PE=1 SV=2	P62937	Uniprot_human_V1.fasta	18012.9	1	6	6	6	0.000807	0.467
Cluster of ATP synthase subunit beta OS=Homo sapiens GN=ATP5B PE=3 SV=1 (F8VPV9)	ATP synthase subunit beta OS=Homo sapiens GN=ATP5B PE=3 SV=1	F8VPV9,P06576	Uniprot_human_V1.fasta	55309.1	1	6	6	6	0.000807	0.17
Cluster of Chloride intracellular channel protein 1 OS=Homo sapiens GN=CLIC1 PE=1 SV=4 (O00299)	Chloride intracellular channel protein 1 OS=Homo sapiens GN=CLIC1 PE=1 SV=4	O00299	Uniprot_human_V1.fasta	26923.3	0.947	2	2	2	0.000269	0.0871
Cluster of Annexin OS=Homo sapiens GN=ANXA5 PE=3 SV=1 (E7ENQ5)	Annexin OS=Homo sapiens GN=ANXA5 PE=3 SV=1	E7ENQ5,E9PHT9,P08758	Uniprot_human_V1.fasta	30864.3	0.997	2	2	2	0.000269	0.0761
Cluster of 14-3-3 protein beta/alpha OS=Homo sapiens GN=YWHAB PE=1 SV=3 (P31946)	14-3-3 protein beta/alpha OS=Homo sapiens GN=YWHAB PE=1 SV=3	P31946,P31946-2,Q4VY19,Q4VY20	Uniprot_human_V1.fasta	28083.1	0.999	2	2	3	0.000403	0.126
Cluster of Keratin, type II cytoskeletal 2 epidermal OS=Homo sapiens GN=KRT2 PE=1 SV=2 (P35908)	Keratin, type II cytoskeletal 2 epidermal OS=Homo sapiens GN=KRT2 PE=1 SV=2	P35908	Uniprot_human_V1.fasta	65433.9	1	23	25	43	0.00578	0.549
Cluster of 14-3-3 protein zeta/delta OS=Homo sapiens GN=YWHAZ PE=1 SV=1 (P63104)	14-3-3 protein zeta/delta OS=Homo sapiens GN=YWHAZ PE=1 SV=1	P63104	Uniprot_human_V1.fasta	27745.9	1	3	3	4	0.000538	0.192
Cluster of Ig kappa chain C region OS=Homo sapiens GN=IGKC PE=1 SV=1 (P01834)	Ig kappa chain C region OS=Homo sapiens GN=IGKC PE=1 SV=1	P01834	Uniprot_human_V1.fasta	11608.6	1	3	3	4	0.000538	0.462
Cluster of Hornerin OS=Homo sapiens GN=HRNR PE=1 SV=2 (Q86YZ3)	Hornerin OS=Homo sapiens GN=HRNR PE=1 SV=2	Q86YZ3	Uniprot_human_V1.fasta	282373	1	3	3	3	0.000403	0.0172
Cluster of Glutamate dehydrogenase OS=Homo sapiens GN=GLUD1 PE=2 SV=1 (B4DGN5)	Glutamate dehydrogenase OS=Homo sapiens GN=GLUD1 PE=2 SV=1	B4DGN5,P00367,P49448	Uniprot_human_V1.fasta	46576.5	1	2	2	2	0.000269	0.0494
Cluster of Suprabasin OS=Homo sapiens GN=SBSN PE=4 SV=1 (E9PBV3)	Suprabasin OS=Homo sapiens GN=SBSN PE=4 SV=1	E9PBV3	Uniprot_human_V1.fasta	60537.2	1	5	5	5	0.000672	0.139
Cluster of Pyruvate kinase (Fragment) OS=Homo sapiens GN=PKM PE=3 SV=1 (H3BTN5)	Pyruvate kinase (Fragment) OS=Homo sapiens GN=PKM PE=3 SV=1	H3BTN5,P14618,P14618-2	Uniprot_human_V1.fasta	53045.9	0.998	2	2	2	0.000269	0.0598
Cluster of Heterogeneous nuclear ribonucleoproteins A2/B1 OS=Homo sapiens GN=HNRNPA2B1 PE=1 SV=2 (P22626)	Heterogeneous nuclear ribonucleoproteins A2/B1 OS=Homo sapiens GN=HNRNPA2B1 PE=1 SV=2	P22626,P22626-2	Uniprot_human_V1.fasta	37430.3	0.993	2	2	2	0.000269	0.0482
Cluster of Heat shock protein HSP 90-alpha OS=Homo sapiens GN=HSP90AA1 PE=1 SV=5 (P07900)	Heat shock protein HSP 90-beta OS=Homo sapiens GN=HSP90AB1 PE=1 SV=4	P08238	Uniprot_human_V1.fasta	83267.3	0.966	1	1	3	0.000403	0.0387
Cluster of Histone H2A type 1 OS=Homo sapiens GN=HIST1H2AG PE=1 SV=2 (P0C0S8)	Histone H2A type 1-B/E OS=Homo sapiens GN=HIST1H2AB PE=1 SV=2	P04908,Q7L7L0,Q93077	Uniprot_human_V1.fasta	14136.1	0.998	1	1	3	0.000403	0.208
Cluster of Alpha-actinin-4 OS=Homo sapiens GN=ACTN4 PE=1 SV=2 (O43707)	Alpha-actinin-4 OS=Homo sapiens GN=ACTN4 PE=1 SV=2	O43707	Uniprot_human_V1.fasta	104857	0.998	2	2	2	0.000269	0.0285
Cluster of Thioredoxin OS=Homo sapiens GN=TXN PE=4 SV=1 (B1ALW1)	Thioredoxin OS=Homo sapiens GN=TXN PE=4 SV=1	B1ALW1,P10599	Uniprot_human_V1.fasta	9451.8	1	4	4	5	0.000672	0.4
Cluster of Decorin (Fragment) OS=Homo sapiens GN=DCN PE=4 SV=1 (F8VUF6)	Decorin (Fragment) OS=Homo sapiens GN=DCN PE=4 SV=1	F8VUF6,F8VWU0,F8VXZ8,P07585	Uniprot_human_V1.fasta	39748.2	1	4	4	4	0.000538	0.281
Cluster of Neuroblast differentiation-associated protein AHNAK OS=Homo sapiens GN=AHNAK PE=1 SV=2 (Q09666)	Neuroblast differentiation-associated protein AHNAK OS=Homo sapiens GN=AHNAK PE=1 SV=2	Q09666	Uniprot_human_V1.fasta	629104	0.893	2	2	2	0.000269	0.00323
Cluster of Tubulin alpha-1C chain OS=Homo sapiens GN=TUBA1C PE=3 SV=1 (F5H5D3)	Tubulin alpha-1C chain OS=Homo sapiens GN=TUBA1C PE=3 SV=1	F5H5D3,G3V1U9,Q71U36,Q9BQE3	Uniprot_human_V1.fasta	57730.6	1	4	5	9	0.00121	0.214
Cluster of 60S ribosomal protein L13 OS=Homo sapiens GN=RPL13 PE=3 SV=1 (F5H1S2)	60S ribosomal protein L13 OS=Homo sapiens GN=RPL13 PE=3 SV=1	F5H1S2,P26373	Uniprot_human_V1.fasta	18845.5	1	3	3	3	0.000403	0.189
Cluster of Dermatopontin OS=Homo sapiens GN=DPT PE=2 SV=2 (Q07507)	Dermatopontin OS=Homo sapiens GN=DPT PE=2 SV=2	Q07507	Uniprot_human_V1.fasta	24004.7	0.998	3	3	3	0.000403	0.164
Cluster of Tubulin beta-4B chain OS=Homo sapiens GN=TUBB4B PE=1 SV=1 (P68371)	Tubulin beta-4B chain OS=Homo sapiens GN=TUBB4B PE=1 SV=1	P68371	Uniprot_human_V1.fasta	49830.7	1	2	2	8	0.00108	0.184
Cluster of Nascent polypeptide-associated complex subunit alpha OS=Homo sapiens GN=NACA PE=4 SV=1 (E9PAV3)	Nascent polypeptide-associated complex subunit alpha OS=Homo sapiens GN=NACA PE=4 SV=1	E9PAV3,F8VU71,F8VZJ2,F8W0W4,H0YHX9,Q13765	Uniprot_human_V1.fasta	205423	1	3	3	3	0.000403	0.0202
Cluster of Prelamin-A/C OS=Homo sapiens GN=LMNA PE=1 SV=1 (P02545)	Prelamin-A/C OS=Homo sapiens GN=LMNA PE=1 SV=1	P02545	Uniprot_human_V1.fasta	74140.7	1	4	4	4	0.000538	0.0738
Cluster of Hemoglobin subunit beta OS=Homo sapiens GN=HBB PE=1 SV=2 (P68871)	Hemoglobin subunit delta OS=Homo sapiens GN=HBD PE=1 SV=2	P02042	Uniprot_human_V1.fasta	16055.2	1	2	2	4	0.000538	0.299
Cluster of Ezrin OS=Homo sapiens GN=EZR PE=4 SV=2 (E7EQR4)	Ezrin OS=Homo sapiens GN=EZR PE=4 SV=2	E7EQR4,P15311	Uniprot_human_V1.fasta	65581	1	3	3	3	0.000403	0.056
Cluster of Keratin, type II cytoskeletal 2 epidermal OS=Homo sapiens GN=KRT2 PE=1 SV=2 (P35908)	Keratin, type II cytoskeletal 6A OS=Homo sapiens GN=KRT6A PE=1 SV=3	P02538	Uniprot_human_V1.fasta	60046.4	1	3	3	26	0.0035	0.332
Cluster of Keratin, type I cytoskeletal 10 OS=Homo sapiens GN=KRT10 PE=1 SV=6 (P13645)	Keratin, type I cytoskeletal 14 OS=Homo sapiens GN=KRT14 PE=1 SV=4	P02533	Uniprot_human_V1.fasta	51562.5	1	9	10	33	0.00444	0.561
Cluster of Keratin, type I cytoskeletal 10 OS=Homo sapiens GN=KRT10 PE=1 SV=6 (P13645)	Junction plakoglobin OS=Homo sapiens GN=JUP PE=1 SV=3	P14923	Uniprot_human_V1.fasta	81745.9	1	2	2	5	0.000672	0.0765
Cluster of Ly6/PLAUR domain-containing protein 3 OS=Homo sapiens GN=LYPD3 PE=1 SV=2 (O95274)	Ly6/PLAUR domain-containing protein 3 OS=Homo sapiens GN=LYPD3 PE=1 SV=2	O95274	Uniprot_human_V1.fasta	35969.7	0.663	2	2	2	0.000269	0.0723
Cluster of Calmodulin-like protein 3 OS=Homo sapiens GN=CALML3 PE=1 SV=2 (P27482)	Calmodulin-like protein 3 OS=Homo sapiens GN=CALML3 PE=1 SV=2	P27482	Uniprot_human_V1.fasta	16890.8	1	4	4	4	0.000538	0.315
Cluster of Galectin-3 OS=Homo sapiens GN=LGALS3 PE=4 SV=1 (G3V3R6)	Galectin-3 OS=Homo sapiens GN=LGALS3 PE=4 SV=1	G3V3R6,P17931	Uniprot_human_V1.fasta	24086.3	1	3	3	3	0.000403	0.133
Cluster of Transaldolase OS=Homo sapiens GN=TALDO1 PE=3 SV=1 (F2Z393)	Transaldolase OS=Homo sapiens GN=TALDO1 PE=3 SV=1	F2Z393,P37837	Uniprot_human_V1.fasta	35330.2	1	2	2	2	0.000269	0.0723
Cluster of Cartilage intermediate layer protein 1 OS=Homo sapiens GN=CILP PE=1 SV=4 (O75339)	Cartilage intermediate layer protein 1 OS=Homo sapiens GN=CILP PE=1 SV=4	O75339	Uniprot_human_V1.fasta	132565	1	5	5	5	0.000672	0.0566
Cluster of Haptoglobin beta chain (Fragment) OS=Homo sapiens GN=HP PE=3 SV=1 (J3QR68)	Haptoglobin beta chain (Fragment) OS=Homo sapiens GN=HP PE=3 SV=1	J3QR68,P00738,Q0VAC5	Uniprot_human_V1.fasta	45040.6	1	5	5	5	0.000672	0.144
Cluster of Transketolase OS=Homo sapiens GN=TKT PE=2 SV=1 (B4E022)	Transketolase OS=Homo sapiens GN=TKT PE=2 SV=1	B4E022,E7EPA7,P29401	Uniprot_human_V1.fasta	62880.7	1	2	2	2	0.000269	0.0642
Cluster of Gelsolin OS=Homo sapiens GN=GSN PE=4 SV=1 (F5H1A8)	Gelsolin OS=Homo sapiens GN=GSN PE=4 SV=1	F5H1A8,P06396,P06396-2,P06396-3,Q5T0H7,Q5T0H8	Uniprot_human_V1.fasta	81484.9	0.984	2	2	2	0.000269	0.0298
Cluster of Ig lambda-7 chain C region OS=Homo sapiens GN=IGLC7 PE=1 SV=2 (A0M8Q6)	Ig lambda-7 chain C region OS=Homo sapiens GN=IGLC7 PE=1 SV=2	A0M8Q6,P0CF74,P0CG05,P0CG06	Uniprot_human_V1.fasta	11302.2	1	2	3	4	0.000538	0.321
Cluster of Filaggrin-2 OS=Homo sapiens GN=FLG2 PE=1 SV=1 (Q5D862)	Filaggrin-2 OS=Homo sapiens GN=FLG2 PE=1 SV=1	Q5D862	Uniprot_human_V1.fasta	248052	0.751	2	2	2	0.000269	0.0151
Cluster of Transgelin-2 OS=Homo sapiens GN=TAGLN2 PE=1 SV=3 (P37802)	Transgelin-2 OS=Homo sapiens GN=TAGLN2 PE=1 SV=3	P37802	Uniprot_human_V1.fasta	22391.9	0.996	2	2	2	0.000269	0.0955
Cluster of Heterogeneous nuclear ribonucleoproteins C1/C2 OS=Homo sapiens GN=HNRNPC PE=2 SV=1 (B4DSU6)	Heterogeneous nuclear ribonucleoproteins C1/C2 OS=Homo sapiens GN=HNRNPC PE=2 SV=1	B4DSU6,B4DY08,G3V251,G3V2Q1,G3V3K6,G3V4C1,G3V4W0,G3V555,G3V575,G3V576,G3V5X6,P07910,P07910-2,P07910-4	Uniprot_human_V1.fasta	15734.7	0.998	2	2	2	0.000269	0.143
Cluster of Histone H2B OS=Homo sapiens GN=HIST2H2BF PE=2 SV=1 (B4DR52)	Histone H2B OS=Homo sapiens GN=HIST2H2BF PE=2 SV=1	B4DR52,O60814,P57053,P58876,P62807,Q5QNW6,Q5QNW6-2,Q93079,Q99877,Q99879,Q99880	Uniprot_human_V1.fasta	13890.6	1	2	2	3	0.000403	0.108
Cluster of Fibrillin-1 OS=Homo sapiens GN=FBN1 PE=1 SV=3 (P35555)	Fibrillin-1 OS=Homo sapiens GN=FBN1 PE=1 SV=3	P35555	Uniprot_human_V1.fasta	312226	1	28	28	28	0.00376	0.116
Cluster of 14-3-3 protein sigma OS=Homo sapiens GN=SFN PE=1 SV=1 (P31947)	14-3-3 protein sigma OS=Homo sapiens GN=SFN PE=1 SV=1	P31947,P31947-2	Uniprot_human_V1.fasta	27774.8	1	5	5	7	0.000941	0.169
Cluster of Collagen alpha-2(VI) chain OS=Homo sapiens GN=COL6A2 PE=1 SV=4 (P12110)	Collagen alpha-2(VI) chain OS=Homo sapiens GN=COL6A2 PE=1 SV=4	P12110	Uniprot_human_V1.fasta	108581	1	8	8	9	0.00121	0.0785
Cluster of Protein S100-A16 OS=Homo sapiens GN=S100A16 PE=1 SV=1 (Q96FQ6)	Protein S100-A16 OS=Homo sapiens GN=S100A16 PE=1 SV=1	Q96FQ6	Uniprot_human_V1.fasta	11801.9	0.995	2	2	2	0.000269	0.233
Cluster of Collagen alpha-1(VI) chain OS=Homo sapiens GN=COL6A1 PE=1 SV=3 (P12109)	Collagen alpha-1(VI) chain OS=Homo sapiens GN=COL6A1 PE=1 SV=3	P12109	Uniprot_human_V1.fasta	108531	1	8	10	12	0.00161	0.0953
Cluster of Alpha-enolase OS=Homo sapiens GN=ENO1 PE=1 SV=2 (P06733)	Alpha-enolase OS=Homo sapiens GN=ENO1 PE=1 SV=2	P06733	Uniprot_human_V1.fasta	47170.2	1	4	4	4	0.000538	0.111
Cluster of Heterogeneous nuclear ribonucleoprotein R OS=Homo sapiens GN=HNRNPR PE=4 SV=1 (E7ETM7)	Heterogeneous nuclear ribonucleoprotein R OS=Homo sapiens GN=HNRNPR PE=4 SV=1	E7ETM7,O43390,O43390-2,O60506,O60506-2,O60506-3,O60506-4	Uniprot_human_V1.fasta	53012.4	0.999	2	2	2	0.000269	0.0423
Cluster of Keratin, type II cytoskeletal 4 OS=Homo sapiens GN=KRT4 PE=3 SV=1 (F8VS64)	Keratin, type II cytoskeletal 4 OS=Homo sapiens GN=KRT4 PE=3 SV=1	F8VS64,P19013	Uniprot_human_V1.fasta	56144.8	1	9	9	14	0.00188	0.217
Cluster of Keratin, type I cytoskeletal 10 OS=Homo sapiens GN=KRT10 PE=1 SV=6 (P13645)	Keratin, type I cytoskeletal 15 OS=Homo sapiens GN=KRT15 PE=1 SV=3	P19012	Uniprot_human_V1.fasta	49212.9	1	3	3	21	0.00282	0.292
Cluster of Elongation factor 1-alpha 1 OS=Homo sapiens GN=EEF1A1 PE=1 SV=1 (P68104)	Elongation factor 1-alpha 1 OS=Homo sapiens GN=EEF1A1 PE=1 SV=1	P68104,Q5VTE0	Uniprot_human_V1.fasta	50141.2	1	6	6	6	0.000807	0.167
Cluster of Tropomyosin alpha-1 chain (Fragment) OS=Homo sapiens GN=TPM1 PE=3 SV=1 (H0YNC7)	Tropomyosin alpha-1 chain (Fragment) OS=Homo sapiens GN=TPM1 PE=3 SV=1	H0YNC7	Uniprot_human_V1.fasta	25582.2	0.99	2	2	2	0.000269	0.13
Cluster of Heterogeneous nuclear ribonucleoprotein K OS=Homo sapiens GN=HNRNPK PE=1 SV=1 (P61978)	Heterogeneous nuclear ribonucleoprotein K OS=Homo sapiens GN=HNRNPK PE=1 SV=1	P61978,P61978-2,P61978-3,Q5T6W2,Q5T6W5	Uniprot_human_V1.fasta	50978.5	0.999	2	2	2	0.000269	0.0734
Cluster of Myosin light polypeptide 6 OS=Homo sapiens GN=MYL6 PE=2 SV=1 (B7Z6Z4)	Myosin light polypeptide 6 OS=Homo sapiens GN=MYL6 PE=2 SV=1	B7Z6Z4,F8VPF3,F8VZV5,F8W1R7,G3V1V0,G8JLA2,J3KND3,P60660,P60660-2	Uniprot_human_V1.fasta	26706.4	0.997	2	2	2	0.000269	0.122
Cluster of Apolipoprotein A-IV OS=Homo sapiens GN=APOA4 PE=1 SV=3 (P06727)	Apolipoprotein A-IV OS=Homo sapiens GN=APOA4 PE=1 SV=3	P06727	Uniprot_human_V1.fasta	45399.4	1	8	8	8	0.00108	0.215
Cluster of Galectin-7 OS=Homo sapiens GN=LGALS7 PE=1 SV=2 (P47929)	Galectin-7 OS=Homo sapiens GN=LGALS7 PE=1 SV=2	P47929	Uniprot_human_V1.fasta	15074.7	1	5	5	7	0.000941	0.441
Cluster of Keratin, type I cytoskeletal 9 OS=Homo sapiens GN=KRT9 PE=1 SV=3 (P35527)	Keratin, type I cytoskeletal 9 OS=Homo sapiens GN=KRT9 PE=1 SV=3	P35527	Uniprot_human_V1.fasta	62065.9	1	18	18	27	0.00363	0.53
Cluster of 40S ribosomal protein SA (Fragment) OS=Homo sapiens GN=RPSA PE=3 SV=1 (C9J9K3)	40S ribosomal protein SA (Fragment) OS=Homo sapiens GN=RPSA PE=3 SV=1	C9J9K3,P08865	Uniprot_human_V1.fasta	29505.9	1	2	2	2	0.000269	0.114
Cluster of Annexin (Fragment) OS=Homo sapiens GN=ANXA2 PE=3 SV=1 (H0YMD0)	Annexin (Fragment) OS=Homo sapiens GN=ANXA2 PE=3 SV=1	H0YMD0,H0YMU9,H0YN42,P07355,P07355-2	Uniprot_human_V1.fasta	25342.9	1	4	4	4	0.000538	0.233
Cluster of Ribonuclease inhibitor OS=Homo sapiens GN=RNH1 PE=1 SV=2 (P13489)	Ribonuclease inhibitor OS=Homo sapiens GN=RNH1 PE=1 SV=2	P13489	Uniprot_human_V1.fasta	49974.4	1	2	2	2	0.000269	0.0542
Cluster of Protein S100-A9 OS=Homo sapiens GN=S100A9 PE=1 SV=1 (P06702)	Protein S100-A9 OS=Homo sapiens GN=S100A9 PE=1 SV=1	P06702	Uniprot_human_V1.fasta	13242.3	0.998	2	3	4	0.000538	0.175
Cluster of 14-3-3 protein epsilon OS=Homo sapiens GN=YWHAE PE=1 SV=1 (P62258)	14-3-3 protein epsilon OS=Homo sapiens GN=YWHAE PE=1 SV=1	P62258,P62258-2	Uniprot_human_V1.fasta	29175	0.993	2	2	3	0.000403	0.141
Cluster of Glutathione S-transferase P OS=Homo sapiens GN=GSTP1 PE=1 SV=2 (P09211)	Glutathione S-transferase P OS=Homo sapiens GN=GSTP1 PE=1 SV=2	P09211	Uniprot_human_V1.fasta	23356.7	1	5	5	5	0.000672	0.362
Cluster of Phosphoglycerate kinase 1 OS=Homo sapiens GN=PGK1 PE=2 SV=1 (B7Z7A9)	Phosphoglycerate kinase 1 OS=Homo sapiens GN=PGK1 PE=2 SV=1	B7Z7A9,P00558	Uniprot_human_V1.fasta	41429.5	1	3	3	3	0.000403	0.111
Cluster of 60 kDa heat shock protein, mitochondrial OS=Homo sapiens GN=HSPD1 PE=1 SV=2 (P10809)	60 kDa heat shock protein, mitochondrial OS=Homo sapiens GN=HSPD1 PE=1 SV=2	P10809	Uniprot_human_V1.fasta	61055.7	0.998	3	3	3	0.000403	0.0716
Cluster of Histone H1.4 OS=Homo sapiens GN=HIST1H1E PE=1 SV=2 (P10412)	Histone H1.4 OS=Homo sapiens GN=HIST1H1E PE=1 SV=2	P10412,P16402,P16403	Uniprot_human_V1.fasta	22351.3	0.994	2	2	2	0.000269	0.1

## Sheet: training-9
Cluster	Protein name	Protein accession numbers	Database sources	Protein molecular weight (Da)	Protein identification probability	Exclusive unique peptide count	Exclusive unique spectrum count	Total spectrum count	Percentage of total spectra	Percentage sequence coverage
Cluster of Sushi repeat-containing protein SRPX OS=Homo sapiens GN=SRPX PE=4 SV=1 (F5H4D7)	Sushi repeat-containing protein SRPX OS=Homo sapiens GN=SRPX PE=4 SV=1	F5H4D7,G3V1L0,P78539,P78539-2	Uniprot_human_V1.fasta	41750.7	1	3	3	3	0.000413	0.0844
Cluster of Hemoglobin subunit alpha OS=Homo sapiens GN=HBA1 PE=1 SV=2 (P69905)	HCG1745306, isoform CRA_a OS=Homo sapiens GN=HBA2 PE=3 SV=1	G3V1N2	Uniprot_human_V1.fasta	11947.9	0.998	1	1	12	0.00165	0.418
Cluster of Myosin-9 OS=Homo sapiens GN=MYH9 PE=1 SV=4 (P35579)	Myosin-9 OS=Homo sapiens GN=MYH9 PE=1 SV=4	P35579,P35579-2	Uniprot_human_V1.fasta	226538	0.923	2	2	2	0.000276	0.00867
Cluster of Desmoplakin OS=Homo sapiens GN=DSP PE=1 SV=3 (P15924)	Desmoplakin OS=Homo sapiens GN=DSP PE=1 SV=3	P15924,P15924-2	Uniprot_human_V1.fasta	331781	1	7	7	7	0.000965	0.0286
Cluster of Complement C3 OS=Homo sapiens GN=C3 PE=1 SV=2 (P01024)	Complement C3 OS=Homo sapiens GN=C3 PE=1 SV=2	P01024	Uniprot_human_V1.fasta	187149	1	4	4	4	0.000551	0.0259
Cluster of Alpha-2-macroglobulin OS=Homo sapiens GN=A2M PE=1 SV=3 (P01023)	Alpha-2-macroglobulin OS=Homo sapiens GN=A2M PE=1 SV=3	P01023	Uniprot_human_V1.fasta	163290	1	4	4	4	0.000551	0.0278
Cluster of Microfibrillar-associated protein 5 OS=Homo sapiens GN=MFAP5 PE=2 SV=1 (B3KW70)	Microfibrillar-associated protein 5 OS=Homo sapiens GN=MFAP5 PE=2 SV=1	B3KW70,F5GYX4,F5H2W4,F5H7Z2,H0YG03,Q13361,Q7Z490	Uniprot_human_V1.fasta	17114	0.971	2	2	2	0.000276	0.142
Cluster of Protein Wnt-5a OS=Homo sapiens GN=WNT5A PE=1 SV=2 (P41221)	Protein Wnt-5a OS=Homo sapiens GN=WNT5A PE=1 SV=2	P41221,P41221-2	Uniprot_human_V1.fasta	42339.1	0.994	2	2	2	0.000276	0.0579
Cluster of Serum albumin OS=Homo sapiens GN=ALB PE=1 SV=2 (P02768)	Serum albumin OS=Homo sapiens GN=ALB PE=1 SV=2	P02768	Uniprot_human_V1.fasta	69366.9	1	26	29	34	0.00469	0.332
Cluster of Alpha-enolase OS=Homo sapiens GN=ENO1 PE=1 SV=2 (P06733)	Alpha-enolase OS=Homo sapiens GN=ENO1 PE=1 SV=2	P06733	Uniprot_human_V1.fasta	47170.2	1	3	3	3	0.000413	0.106
Cluster of Hemoglobin subunit beta OS=Homo sapiens GN=HBB PE=1 SV=2 (P68871)	Hemoglobin subunit beta OS=Homo sapiens GN=HBB PE=1 SV=2	P68871	Uniprot_human_V1.fasta	15998	1	5	5	17	0.00234	0.639
Cluster of Alpha-1-antichymotrypsin His-Pro-less OS=Homo sapiens GN=SERPINA3 PE=3 SV=1 (G3V3A0)	Alpha-1-antichymotrypsin His-Pro-less OS=Homo sapiens GN=SERPINA3 PE=3 SV=1	G3V3A0,G3V5I3,P01011	Uniprot_human_V1.fasta	23406.9	0.991	2	2	2	0.000276	0.102
Cluster of Keratin, type II cytoskeletal 2 epidermal OS=Homo sapiens GN=KRT2 PE=1 SV=2 (P35908)	Keratin, type II cytoskeletal 80 OS=Homo sapiens GN=KRT80 PE=1 SV=2	Q6KB66,Q6KB66-2,Q6KB66-3	Uniprot_human_V1.fasta	50525.7	0.933	1	1	4	0.000551	0.0442
Cluster of Dihydropyrimidinase-related protein 2 OS=Homo sapiens GN=DPYSL2 PE=2 SV=1 (B4DR31)	Dihydropyrimidinase-related protein 2 OS=Homo sapiens GN=DPYSL2 PE=2 SV=1	B4DR31,Q16555	Uniprot_human_V1.fasta	58162.9	1	2	2	2	0.000276	0.0522
Cluster of Alpha-1-antitrypsin OS=Homo sapiens GN=SERPINA1 PE=1 SV=3 (P01009)	Alpha-1-antitrypsin OS=Homo sapiens GN=SERPINA1 PE=1 SV=3	P01009	Uniprot_human_V1.fasta	46737.9	1	5	5	5	0.000689	0.108
Cluster of Tubulin alpha-1B chain OS=Homo sapiens GN=TUBA1B PE=1 SV=1 (P68363)	Tubulin alpha-1B chain OS=Homo sapiens GN=TUBA1B PE=1 SV=1	P68363	Uniprot_human_V1.fasta	50151.7	0.999	1	1	5	0.000689	0.144
Cluster of Fibrillin-1 OS=Homo sapiens GN=FBN1 PE=1 SV=3 (P35555)	Fibrillin-1 OS=Homo sapiens GN=FBN1 PE=1 SV=3	P35555	Uniprot_human_V1.fasta	312226	1	33	34	36	0.00496	0.151
Cluster of Complement C1q subcomponent subunit C OS=Homo sapiens GN=C1QC PE=1 SV=3 (P02747)	Complement C1q subcomponent subunit C OS=Homo sapiens GN=C1QC PE=1 SV=3	P02747	Uniprot_human_V1.fasta	25774	1	3	3	4	0.000551	0.159
Cluster of Serum amyloid P-component OS=Homo sapiens GN=APCS PE=1 SV=2 (P02743)	Serum amyloid P-component OS=Homo sapiens GN=APCS PE=1 SV=2	P02743	Uniprot_human_V1.fasta	25387.7	1	7	7	10	0.00138	0.287
Cluster of Glyceraldehyde-3-phosphate dehydrogenase OS=Homo sapiens GN=GAPDH PE=1 SV=3 (P04406)	Glyceraldehyde-3-phosphate dehydrogenase OS=Homo sapiens GN=GAPDH PE=1 SV=3	P04406	Uniprot_human_V1.fasta	36053.4	1	5	5	6	0.000827	0.164
Cluster of Galectin-1 OS=Homo sapiens GN=LGALS1 PE=1 SV=2 (P09382)	Galectin-1 OS=Homo sapiens GN=LGALS1 PE=1 SV=2	P09382	Uniprot_human_V1.fasta	14715.8	1	2	2	2	0.000276	0.148
Cluster of Collagen alpha-2(I) chain OS=Homo sapiens GN=COL1A2 PE=1 SV=7 (P08123)	Collagen alpha-2(I) chain OS=Homo sapiens GN=COL1A2 PE=1 SV=7	P08123	Uniprot_human_V1.fasta	129315	1	6	7	9	0.00124	0.0534
Cluster of Heat shock protein beta-1 OS=Homo sapiens GN=HSPB1 PE=1 SV=2 (P04792)	Heat shock protein beta-1 OS=Homo sapiens GN=HSPB1 PE=1 SV=2	P04792	Uniprot_human_V1.fasta	22782.6	1	2	2	2	0.000276	0.132
Cluster of Ig alpha-1 chain C region OS=Homo sapiens GN=IGHA1 PE=1 SV=2 (P01876)	Ig alpha-1 chain C region OS=Homo sapiens GN=IGHA1 PE=1 SV=2	P01876	Uniprot_human_V1.fasta	37653.8	1	7	7	9	0.00124	0.329
Cluster of Tubulin alpha-1B chain OS=Homo sapiens GN=TUBA1B PE=1 SV=1 (P68363)	Tubulin alpha-1C chain OS=Homo sapiens GN=TUBA1C PE=3 SV=1	F5H5D3,G3V1U9,Q71U36,Q9BQE3	Uniprot_human_V1.fasta	57730.6	0.91	1	1	5	0.000689	0.125
Cluster of Fibrinogen gamma chain OS=Homo sapiens GN=FGG PE=4 SV=1 (C9JC84)	Fibrinogen gamma chain OS=Homo sapiens GN=FGG PE=4 SV=1	C9JC84,C9JEU5,P02679,P02679-2	Uniprot_human_V1.fasta	52339.2	1	5	5	5	0.000689	0.137
Cluster of Keratin, type II cytoskeletal 2 epidermal OS=Homo sapiens GN=KRT2 PE=1 SV=2 (P35908)	Keratin, type II cytoskeletal 5 OS=Homo sapiens GN=KRT5 PE=1 SV=3	P13647	Uniprot_human_V1.fasta	62379.6	1	10	10	20	0.00276	0.254
Cluster of Keratin, type I cytoskeletal 10 OS=Homo sapiens GN=KRT10 PE=1 SV=6 (P13645)	Keratin, type I cytoskeletal 10 OS=Homo sapiens GN=KRT10 PE=1 SV=6	P13645	Uniprot_human_V1.fasta	58828.8	1	20	22	32	0.00441	0.378
Cluster of Keratin, type II cytoskeletal 2 epidermal OS=Homo sapiens GN=KRT2 PE=1 SV=2 (P35908)	Keratin, type II cytoskeletal 1b OS=Homo sapiens GN=KRT77 PE=1 SV=3	Q7Z794	Uniprot_human_V1.fasta	61901.9	1	2	2	8	0.0011	0.0934
Cluster of Pyruvate kinase (Fragment) OS=Homo sapiens GN=PKM PE=3 SV=1 (H3BTN5)	Pyruvate kinase (Fragment) OS=Homo sapiens GN=PKM PE=3 SV=1	H3BTN5,P14618,P14618-2	Uniprot_human_V1.fasta	57937.5	0.999	2	2	2	0.000276	0.0495
Cluster of Actin, cytoplasmic 1 OS=Homo sapiens GN=ACTB PE=1 SV=1 (P60709)	Actin, cytoplasmic 1 OS=Homo sapiens GN=ACTB PE=1 SV=1	P60709,P63261	Uniprot_human_V1.fasta	41737.8	1	4	4	11	0.00152	0.211
Cluster of Keratin, type I cytoskeletal 16 OS=Homo sapiens GN=KRT16 PE=1 SV=4 (P08779)	Keratin, type I cytoskeletal 17 OS=Homo sapiens GN=KRT17 PE=1 SV=2	Q04695	Uniprot_human_V1.fasta	48106.7	1	3	3	12	0.00165	0.16
Cluster of Ig gamma-1 chain C region OS=Homo sapiens GN=IGHG1 PE=1 SV=1 (P01857)	Ig gamma-3 chain C region OS=Homo sapiens GN=IGHG3 PE=1 SV=2	P01860	Uniprot_human_V1.fasta	41285.9	1	2	2	11	0.00152	0.249
Cluster of Complement factor H OS=Homo sapiens GN=CFH PE=1 SV=4 (P08603)	Complement factor H OS=Homo sapiens GN=CFH PE=1 SV=4	P08603	Uniprot_human_V1.fasta	139096	1	7	7	8	0.0011	0.0845
Cluster of Keratin, type I cytoskeletal 9 OS=Homo sapiens GN=KRT9 PE=1 SV=3 (P35527)	Keratin, type I cytoskeletal 9 OS=Homo sapiens GN=KRT9 PE=1 SV=3	P35527	Uniprot_human_V1.fasta	62065.9	1	17	19	29	0.004	0.48
Cluster of Ig gamma-1 chain C region OS=Homo sapiens GN=IGHG1 PE=1 SV=1 (P01857)	Ig gamma-2 chain C region OS=Homo sapiens GN=IGHG2 PE=1 SV=2	P01859	Uniprot_human_V1.fasta	35899.2	0.968	1	1	9	0.00124	0.245
Cluster of Histone H2B OS=Homo sapiens GN=HIST2H2BF PE=2 SV=1 (B4DR52)	Histone H2B OS=Homo sapiens GN=HIST2H2BF PE=2 SV=1	B4DR52,O60814,P57053,P58876,P62807,Q5QNW6,Q5QNW6-2,Q93079,Q99877,Q99879,Q99880	Uniprot_human_V1.fasta	18041.3	1	2	2	3	0.000413	0.108
Cluster of Ig gamma-1 chain C region OS=Homo sapiens GN=IGHG1 PE=1 SV=1 (P01857)	Ig gamma-1 chain C region OS=Homo sapiens GN=IGHG1 PE=1 SV=1	P01857	Uniprot_human_V1.fasta	36105	1	5	6	20	0.00276	0.391
Cluster of Peptidyl-prolyl cis-trans isomerase A OS=Homo sapiens GN=PPIA PE=1 SV=2 (P62937)	Peptidyl-prolyl cis-trans isomerase A OS=Homo sapiens GN=PPIA PE=1 SV=2	P62937	Uniprot_human_V1.fasta	18012.9	1	2	2	2	0.000276	0.164
Cluster of Fibulin 1 OS=Homo sapiens GN=FBLN1 PE=4 SV=1 (B1AHL2)	Fibulin 1 OS=Homo sapiens GN=FBLN1 PE=4 SV=1	B1AHL2,P23142-4	Uniprot_human_V1.fasta	78327.1	1	3	3	3	0.000413	0.0444
Cluster of Mimecan OS=Homo sapiens GN=OGN PE=1 SV=1 (P20774)	Mimecan OS=Homo sapiens GN=OGN PE=1 SV=1	P20774	Uniprot_human_V1.fasta	33925	1	6	6	6	0.000827	0.171
Cluster of Heat shock 70 kDa protein 1A/1B OS=Homo sapiens GN=HSPA1B PE=3 SV=1 (F8VZJ4)	Heat shock 70 kDa protein 1A/1B OS=Homo sapiens GN=HSPA1B PE=3 SV=1	F8VZJ4,P08107,P34931,Q53FA3	Uniprot_human_V1.fasta	67515	1	2	2	3	0.000413	0.0583
Cluster of Junction plakoglobin OS=Homo sapiens GN=JUP PE=1 SV=3 (P14923)	Junction plakoglobin OS=Homo sapiens GN=JUP PE=1 SV=3	P14923	Uniprot_human_V1.fasta	81745.9	0.99	2	2	2	0.000276	0.0282
Cluster of Basement membrane-specific heparan sulfate proteoglycan core protein OS=Homo sapiens GN=HSPG2 PE=1 SV=4 (P98160)	Basement membrane-specific heparan sulfate proteoglycan core protein OS=Homo sapiens GN=HSPG2 PE=1 SV=4	P98160	Uniprot_human_V1.fasta	468811	1	5	5	5	0.000689	0.0134
Cluster of Annexin (Fragment) OS=Homo sapiens GN=ANXA2 PE=3 SV=1 (H0YMD0)	Annexin (Fragment) OS=Homo sapiens GN=ANXA2 PE=3 SV=1	H0YMD0,H0YMU9,H0YN42,P07355,P07355-2	Uniprot_human_V1.fasta	25342.9	1	5	5	5	0.000689	0.233
Cluster of Coiled-coil domain-containing protein 80 OS=Homo sapiens GN=CCDC80 PE=1 SV=1 (Q76M96)	Coiled-coil domain-containing protein 80 OS=Homo sapiens GN=CCDC80 PE=1 SV=1	Q76M96,Q76M96-2	Uniprot_human_V1.fasta	108176	1	2	2	2	0.000276	0.0263
Cluster of Peroxiredoxin-1 OS=Homo sapiens GN=PRDX1 PE=1 SV=1 (Q06830)	Peroxiredoxin-1 OS=Homo sapiens GN=PRDX1 PE=1 SV=1	Q06830	Uniprot_human_V1.fasta	22110.9	0.998	2	2	3	0.000413	0.146
Cluster of Tenascin XB OS=Homo sapiens GN=TNXB PE=4 SV=1 (B0UYX3)	Tenascin XB OS=Homo sapiens GN=TNXB PE=4 SV=1	B0UYX3,B0V046,E7EPZ9,E7EU03,E7EWZ8,P22105,P22105-3	Uniprot_human_V1.fasta	456143	1	17	17	17	0.00234	0.0505
Cluster of Keratin, type II cytoskeletal 1 OS=Homo sapiens GN=KRT1 PE=1 SV=6 (P04264)	Keratin, type II cytoskeletal 1 OS=Homo sapiens GN=KRT1 PE=1 SV=6	P04264	Uniprot_human_V1.fasta	66040.3	1	24	30	57	0.00786	0.484
Cluster of Ubiquitin OS=Homo sapiens GN=UBB PE=2 SV=1 (B4DV12)	Ubiquitin OS=Homo sapiens GN=UBB PE=2 SV=1	B4DV12,F5GXK7,F5GYU3,F5GZ39,F5H041,F5H265,F5H2Z3,F5H388,F5H4D8,F5H6Q2,F5H747,F5H7K6,F5H7Y5,J3QKN0,J3QS39,J3QSA3,J3QTR3,P0CG47,P0CG48,P62979,P62987,Q96C32	Uniprot_human_V1.fasta	17215.6	0.999	2	2	2	0.000276	0.144
Cluster of Apolipoprotein E OS=Homo sapiens GN=APOE PE=1 SV=1 (P02649)	Apolipoprotein E OS=Homo sapiens GN=APOE PE=1 SV=1	P02649	Uniprot_human_V1.fasta	36153.5	1	6	6	6	0.000827	0.202
Cluster of Ig kappa chain C region OS=Homo sapiens GN=IGKC PE=1 SV=1 (P01834)	Ig kappa chain C region OS=Homo sapiens GN=IGKC PE=1 SV=1	P01834	Uniprot_human_V1.fasta	11608.6	1	3	3	4	0.000551	0.462
Cluster of Coagulation factor XIII A chain OS=Homo sapiens GN=F13A1 PE=1 SV=4 (P00488)	Coagulation factor XIII A chain OS=Homo sapiens GN=F13A1 PE=1 SV=4	P00488	Uniprot_human_V1.fasta	83267.3	1	3	3	3	0.000413	0.0546
Cluster of Keratin, type II cytoskeletal 2 epidermal OS=Homo sapiens GN=KRT2 PE=1 SV=2 (P35908)	Keratin, type II cytoskeletal 6B OS=Homo sapiens GN=KRT6B PE=1 SV=5	P04259	Uniprot_human_V1.fasta	60068.6	1	2	2	22	0.00303	0.254
Cluster of Transforming growth factor-beta-induced protein ig-h3 OS=Homo sapiens GN=TGFBI PE=4 SV=1 (G8JLA8)	Transforming growth factor-beta-induced protein ig-h3 OS=Homo sapiens GN=TGFBI PE=4 SV=1	G8JLA8,Q15582	Uniprot_human_V1.fasta	74695.8	1	2	2	2	0.000276	0.0425
Cluster of Ig kappa chain V-III region SIE OS=Homo sapiens PE=1 SV=1 (P01620)	Ig kappa chain V-III region SIE OS=Homo sapiens PE=1 SV=1	P01620,P01623,P18135,P18136	Uniprot_human_V1.fasta	11775.4	0.995	2	2	2	0.000276	0.229
Cluster of Peroxiredoxin-2 OS=Homo sapiens GN=PRDX2 PE=1 SV=5 (P32119)	Peroxiredoxin-2 OS=Homo sapiens GN=PRDX2 PE=1 SV=5	P32119	Uniprot_human_V1.fasta	21892.4	1	2	2	3	0.000413	0.141
Cluster of Asporin OS=Homo sapiens GN=ASPN PE=1 SV=2 (Q9BXN1)	Asporin OS=Homo sapiens GN=ASPN PE=1 SV=2	Q9BXN1	Uniprot_human_V1.fasta	43419.8	0.998	2	2	2	0.000276	0.0763
Cluster of Prolargin OS=Homo sapiens GN=PRELP PE=1 SV=1 (P51888)	Prolargin OS=Homo sapiens GN=PRELP PE=1 SV=1	P51888	Uniprot_human_V1.fasta	43812.4	1	3	3	3	0.000413	0.0812
Cluster of Lumican OS=Homo sapiens GN=LUM PE=1 SV=2 (P51884)	Lumican OS=Homo sapiens GN=LUM PE=1 SV=2	P51884	Uniprot_human_V1.fasta	38431.5	1	5	5	7	0.000965	0.166
Cluster of Collagen alpha-3(VI) chain OS=Homo sapiens GN=COL6A3 PE=4 SV=1 (E9PCV6)	Collagen alpha-3(VI) chain OS=Homo sapiens GN=COL6A3 PE=4 SV=1	E9PCV6,P12111,P12111-2	Uniprot_human_V1.fasta	321999	1	58	60	71	0.00979	0.197
Cluster of Complement factor H OS=Homo sapiens GN=CFH PE=1 SV=4 (P08603)	Complement factor H-related 1 OS=Homo sapiens GN=CFHR1 PE=4 SV=1	B1AKG0,Q03591	Uniprot_human_V1.fasta	30858.1	0.996	1	1	3	0.000413	0.0886
Cluster of Collagen alpha-1(XII) chain OS=Homo sapiens GN=COL12A1 PE=4 SV=1 (D6RGG3)	Collagen alpha-1(XII) chain OS=Homo sapiens GN=COL12A1 PE=4 SV=1	D6RGG3,Q99715,Q99715-4	Uniprot_human_V1.fasta	333200	1	6	6	8	0.0011	0.0196
Cluster of Neuroblast differentiation-associated protein AHNAK OS=Homo sapiens GN=AHNAK PE=1 SV=2 (Q09666)	Neuroblast differentiation-associated protein AHNAK OS=Homo sapiens GN=AHNAK PE=1 SV=2	Q09666	Uniprot_human_V1.fasta	629104	1	3	3	3	0.000413	0.00611
Cluster of Clusterin OS=Homo sapiens GN=CLU PE=1 SV=1 (P10909)	Clusterin OS=Homo sapiens GN=CLU PE=1 SV=1	P10909,P10909-2,P10909-4,P10909-5	Uniprot_human_V1.fasta	52495	1	5	6	6	0.000827	0.165
Cluster of 78 kDa glucose-regulated protein OS=Homo sapiens GN=HSPA5 PE=1 SV=2 (P11021)	78 kDa glucose-regulated protein OS=Homo sapiens GN=HSPA5 PE=1 SV=2	P11021	Uniprot_human_V1.fasta	72334.7	0.998	2	2	2	0.000276	0.0443
Cluster of Membrane primary amine oxidase OS=Homo sapiens GN=AOC3 PE=1 SV=3 (Q16853)	Membrane primary amine oxidase OS=Homo sapiens GN=AOC3 PE=1 SV=3	Q16853	Uniprot_human_V1.fasta	84622.1	0.998	2	2	2	0.000276	0.038
Cluster of Decorin OS=Homo sapiens GN=DCN PE=1 SV=1 (P07585)	Decorin OS=Homo sapiens GN=DCN PE=1 SV=1	P07585	Uniprot_human_V1.fasta	39748.2	1	7	7	9	0.00124	0.217
Cluster of Ig mu chain C region OS=Homo sapiens GN=IGHM PE=1 SV=3 (P01871)	Ig mu chain C region OS=Homo sapiens GN=IGHM PE=1 SV=3	P01871,P01871-2	Uniprot_human_V1.fasta	49305.7	1	6	6	6	0.000827	0.144
Cluster of Mast cell carboxypeptidase A OS=Homo sapiens GN=CPA3 PE=1 SV=2 (P15088)	Mast cell carboxypeptidase A OS=Homo sapiens GN=CPA3 PE=1 SV=2	P15088	Uniprot_human_V1.fasta	48671.8	0.999	2	2	2	0.000276	0.0384
Cluster of SERPINB12 protein OS=Homo sapiens GN=SERPINB12 PE=2 SV=1 (Q3SYB4)	SERPINB12 protein OS=Homo sapiens GN=SERPINB12 PE=2 SV=1	Q3SYB4,Q96P63	Uniprot_human_V1.fasta	48447.1	1	2	2	2	0.000276	0.0588
Cluster of Ig lambda-2 chain C regions OS=Homo sapiens GN=IGLC2 PE=1 SV=1 (P0CG05)	Ig lambda-2 chain C regions OS=Homo sapiens GN=IGLC2 PE=1 SV=1	P0CG05,P0CG06	Uniprot_human_V1.fasta	11293.2	1	5	6	11	0.00152	0.604
Cluster of Secreted frizzled-related protein 2 OS=Homo sapiens GN=SFRP2 PE=1 SV=2 (Q96HF1)	Secreted frizzled-related protein 2 OS=Homo sapiens GN=SFRP2 PE=1 SV=2	Q96HF1	Uniprot_human_V1.fasta	33491.1	1	3	3	3	0.000413	0.0508
Cluster of Hemoglobin subunit beta OS=Homo sapiens GN=HBB PE=1 SV=2 (P68871)	Hemoglobin subunit delta OS=Homo sapiens GN=HBD PE=1 SV=2	P02042	Uniprot_human_V1.fasta	16055.2	1	2	2	9	0.00124	0.429
Cluster of Tetranectin OS=Homo sapiens GN=CLEC3B PE=4 SV=1 (E9PHK0)	Tetranectin OS=Homo sapiens GN=CLEC3B PE=4 SV=1	E9PHK0,P05452	Uniprot_human_V1.fasta	17794.2	1	6	6	7	0.000965	0.45
Cluster of Keratin, type II cytoskeletal 2 epidermal OS=Homo sapiens GN=KRT2 PE=1 SV=2 (P35908)	Keratin, type II cytoskeletal 6A OS=Homo sapiens GN=KRT6A PE=1 SV=3	P02538	Uniprot_human_V1.fasta	60046.4	1	3	3	21	0.00289	0.284
Cluster of Keratin, type I cytoskeletal 16 OS=Homo sapiens GN=KRT16 PE=1 SV=4 (P08779)	Keratin, type I cytoskeletal 14 OS=Homo sapiens GN=KRT14 PE=1 SV=4	P02533	Uniprot_human_V1.fasta	51562.5	1	6	6	20	0.00276	0.381
Cluster of Carbonic anhydrase 1 (Fragment) OS=Homo sapiens GN=CA1 PE=4 SV=1 (E5RHP7)	Carbonic anhydrase 1 (Fragment) OS=Homo sapiens GN=CA1 PE=4 SV=1	E5RHP7,P00915	Uniprot_human_V1.fasta	27754	1	5	5	5	0.000689	0.239
Cluster of Histone H4 OS=Homo sapiens GN=HIST1H4A PE=1 SV=2 (P62805)	Histone H4 OS=Homo sapiens GN=HIST1H4A PE=1 SV=2	P62805	Uniprot_human_V1.fasta	11367.7	1	4	4	4	0.000551	0.311
Cluster of Complement component C4B (Childo blood group) OS=Homo sapiens GN=C4B-1 PE=4 SV=1 (A2BHY4)	Complement component C4B (Childo blood group) OS=Homo sapiens GN=C4B-1 PE=4 SV=1	A2BHY4,A6H8M8,B0UZ83,B0V2C8,F5GXS0,F8VNV9,F8VSI2,F8VW91,F8VX64,F8VZD8,P0C0L4,P0C0L5,Q5JNX2,Q6U2E9	Uniprot_human_V1.fasta	192799	1	3	3	3	0.000413	0.0224
Cluster of Vimentin OS=Homo sapiens GN=VIM PE=1 SV=4 (P08670)	Desmin OS=Homo sapiens GN=DES PE=1 SV=3	P17661	Uniprot_human_V1.fasta	53536.6	1	3	3	5	0.000689	0.121
Cluster of CD5 antigen-like OS=Homo sapiens GN=CD5L PE=1 SV=1 (O43866)	CD5 antigen-like OS=Homo sapiens GN=CD5L PE=1 SV=1	O43866	Uniprot_human_V1.fasta	38085.9	0.973	2	2	2	0.000276	0.0403
Cluster of Keratin, type II cytoskeletal 78 OS=Homo sapiens GN=KRT78 PE=2 SV=2 (Q8N1N4)	Keratin, type II cytoskeletal 78 OS=Homo sapiens GN=KRT78 PE=2 SV=2	Q8N1N4	Uniprot_human_V1.fasta	56866.4	0.995	2	2	3	0.000413	0.0692
Cluster of Tubulin beta chain OS=Homo sapiens GN=TUBB PE=4 SV=1 (E7EWR1)	Tubulin beta chain OS=Homo sapiens GN=TUBB PE=4 SV=1	E7EWR1,F8VUJ7,F8VW92,F8VYX6,P07437,Q5JP53,Q5ST81	Uniprot_human_V1.fasta	39727.7	1	1	1	6	0.000827	0.198
Cluster of Fibrinogen beta chain OS=Homo sapiens GN=FGB PE=4 SV=1 (D6REL8)	Fibrinogen beta chain OS=Homo sapiens GN=FGB PE=4 SV=1	D6REL8,P02675	Uniprot_human_V1.fasta	55928.6	1	3	3	4	0.000551	0.151
Cluster of Histone H1.3 OS=Homo sapiens GN=HIST1H1D PE=1 SV=2 (P16402)	Histone H1.3 OS=Homo sapiens GN=HIST1H1D PE=1 SV=2	P16402	Uniprot_human_V1.fasta	22351.3	1	3	3	3	0.000413	0.154
Cluster of ATP synthase subunit alpha OS=Homo sapiens GN=ATP5A1 PE=2 SV=1 (A8K092)	ATP synthase subunit alpha OS=Homo sapiens GN=ATP5A1 PE=2 SV=1	A8K092,P25705	Uniprot_human_V1.fasta	54495.1	1	3	3	3	0.000413	0.0636
Cluster of Creatine kinase M-type OS=Homo sapiens GN=CKM PE=1 SV=2 (P06732)	Creatine kinase M-type OS=Homo sapiens GN=CKM PE=1 SV=2	P06732	Uniprot_human_V1.fasta	43101.6	1	4	4	4	0.000551	0.155
Cluster of Podocan OS=Homo sapiens GN=PODN PE=1 SV=2 (Q7Z5L7)	Podocan OS=Homo sapiens GN=PODN PE=1 SV=2	Q7Z5L7,Q7Z5L7-2,Q7Z5L7-3,Q7Z5L7-4	Uniprot_human_V1.fasta	68979.1	0.998	2	2	2	0.000276	0.0359
Cluster of Prelamin-A/C OS=Homo sapiens GN=LMNA PE=1 SV=1 (P02545)	Prelamin-A/C OS=Homo sapiens GN=LMNA PE=1 SV=1	P02545	Uniprot_human_V1.fasta	74140.7	1	7	7	7	0.000965	0.117
Cluster of Myosin light polypeptide 6 OS=Homo sapiens GN=MYL6 PE=2 SV=1 (B7Z6Z4)	Myosin light polypeptide 6 OS=Homo sapiens GN=MYL6 PE=2 SV=1	B7Z6Z4,F8VPF3,F8VZV5,F8W1I5,F8W1R7,G3V1V0,G8JLA2,J3KND3,P14649,P60660,P60660-2	Uniprot_human_V1.fasta	26706.4	1	2	2	2	0.000276	0.101
Cluster of Serotransferrin OS=Homo sapiens GN=TF PE=1 SV=3 (P02787)	Serotransferrin OS=Homo sapiens GN=TF PE=1 SV=3	P02787	Uniprot_human_V1.fasta	77064.3	1	8	8	8	0.0011	0.12
Cluster of Apolipoprotein A-IV OS=Homo sapiens GN=APOA4 PE=1 SV=3 (P06727)	Apolipoprotein A-IV OS=Homo sapiens GN=APOA4 PE=1 SV=3	P06727	Uniprot_human_V1.fasta	45399.4	1	20	21	21	0.00289	0.434
Cluster of Extracellular superoxide dismutase [Cu-Zn] OS=Homo sapiens GN=SOD3 PE=1 SV=2 (P08294)	Extracellular superoxide dismutase [Cu-Zn] OS=Homo sapiens GN=SOD3 PE=1 SV=2	P08294	Uniprot_human_V1.fasta	25850.3	1	3	3	3	0.000413	0.154
Cluster of Fructose-bisphosphate aldolase OS=Homo sapiens GN=ALDOA PE=3 SV=1 (H3BQN4)	Fructose-bisphosphate aldolase OS=Homo sapiens GN=ALDOA PE=3 SV=1	H3BQN4,J3KPS3,P04075	Uniprot_human_V1.fasta	39340.7	1	3	3	3	0.000413	0.119
Cluster of Keratin, type II cytoskeletal 2 epidermal OS=Homo sapiens GN=KRT2 PE=1 SV=2 (P35908)	Keratin, type II cytoskeletal 2 epidermal OS=Homo sapiens GN=KRT2 PE=1 SV=2	P35908	Uniprot_human_V1.fasta	65433.9	1	19	19	37	0.0051	0.526
Cluster of Collagen alpha-1(I) chain OS=Homo sapiens GN=COL1A1 PE=1 SV=5 (P02452)	Collagen alpha-1(I) chain OS=Homo sapiens GN=COL1A1 PE=1 SV=5	P02452	Uniprot_human_V1.fasta	138941	1	8	8	9	0.00124	0.0676
Cluster of Desmoglein-1 OS=Homo sapiens GN=DSG1 PE=1 SV=2 (Q02413)	Desmoglein-1 OS=Homo sapiens GN=DSG1 PE=1 SV=2	Q02413	Uniprot_human_V1.fasta	113749	1	3	3	3	0.000413	0.041
Cluster of Gelsolin OS=Homo sapiens GN=GSN PE=4 SV=1 (F5H1A8)	Gelsolin OS=Homo sapiens GN=GSN PE=4 SV=1	F5H1A8,P06396,P06396-2,P06396-3	Uniprot_human_V1.fasta	81484.9	1	4	4	4	0.000551	0.0636
Cluster of Histone H2A type 1 OS=Homo sapiens GN=HIST1H2AG PE=1 SV=2 (P0C0S8)	Histone H2A type 1 OS=Homo sapiens GN=HIST1H2AG PE=1 SV=2	P0C0S8,P20671,Q16777,Q6FI13,Q96KK5,Q99878,Q9BTM1,Q9BTM1-2	Uniprot_human_V1.fasta	14092.1	1	2	2	3	0.000413	0.154
Cluster of Keratin, type I cytoskeletal 16 OS=Homo sapiens GN=KRT16 PE=1 SV=4 (P08779)	Keratin, type I cytoskeletal 16 OS=Homo sapiens GN=KRT16 PE=1 SV=4	P08779	Uniprot_human_V1.fasta	51269	1	10	11	24	0.00331	0.433
Cluster of Collagen alpha-2(VI) chain OS=Homo sapiens GN=COL6A2 PE=1 SV=4 (P12110)	Collagen alpha-2(VI) chain OS=Homo sapiens GN=COL6A2 PE=1 SV=4	P12110	Uniprot_human_V1.fasta	108581	1	13	13	15	0.00207	0.14
Cluster of Hemoglobin subunit alpha OS=Homo sapiens GN=HBA1 PE=1 SV=2 (P69905)	Hemoglobin subunit alpha OS=Homo sapiens GN=HBA1 PE=1 SV=2	P69905	Uniprot_human_V1.fasta	15257.6	1	2	3	15	0.00207	0.507
Cluster of Cartilage intermediate layer protein 1 OS=Homo sapiens GN=CILP PE=1 SV=4 (O75339)	Cartilage intermediate layer protein 1 OS=Homo sapiens GN=CILP PE=1 SV=4	O75339	Uniprot_human_V1.fasta	132565	1	6	6	6	0.000827	0.0726
Cluster of Collagen alpha-1(VI) chain OS=Homo sapiens GN=COL6A1 PE=1 SV=3 (P12109)	Collagen alpha-1(VI) chain OS=Homo sapiens GN=COL6A1 PE=1 SV=3	P12109	Uniprot_human_V1.fasta	108531	1	13	13	18	0.00248	0.125
Cluster of Phospholipase A2, membrane associated OS=Homo sapiens GN=PLA2G2A PE=1 SV=2 (P14555)	Phospholipase A2, membrane associated OS=Homo sapiens GN=PLA2G2A PE=1 SV=2	P14555	Uniprot_human_V1.fasta	16083	1	3	3	3	0.000413	0.306
Cluster of Latent-transforming growth factor beta-binding protein 4 OS=Homo sapiens GN=LTBP4 PE=4 SV=1 (E7EUU1)	Latent-transforming growth factor beta-binding protein 4 OS=Homo sapiens GN=LTBP4 PE=4 SV=1	E7EUU1,Q8N2S1-2	Uniprot_human_V1.fasta	165678	0.998	2	2	2	0.000276	0.0148
Cluster of Complement component C9 OS=Homo sapiens GN=C9 PE=1 SV=2 (P02748)	Complement component C9 OS=Homo sapiens GN=C9 PE=1 SV=2	P02748	Uniprot_human_V1.fasta	63174.9	1	2	2	2	0.000276	0.0411
Cluster of Myosin-2 OS=Homo sapiens GN=MYH2 PE=1 SV=1 (Q9UKX2)	Myosin-2 OS=Homo sapiens GN=MYH2 PE=1 SV=1	Q9UKX2	Uniprot_human_V1.fasta	223050	1	20	20	20	0.00276	0.132
Cluster of Beta-2-glycoprotein 1 (Fragment) OS=Homo sapiens GN=APOH PE=4 SV=1 (J3QRN2)	Beta-2-glycoprotein 1 (Fragment) OS=Homo sapiens GN=APOH PE=4 SV=1	J3QRN2,P02749	Uniprot_human_V1.fasta	19907.6	1	3	3	3	0.000413	0.282
Cluster of Alcohol dehydrogenase 1B OS=Homo sapiens GN=ADH1B PE=1 SV=2 (P00325)	Alcohol dehydrogenase 1B OS=Homo sapiens GN=ADH1B PE=1 SV=2	P00325	Uniprot_human_V1.fasta	39854.3	0.999	3	3	3	0.000413	0.072
Cluster of Cathepsin G OS=Homo sapiens GN=CTSG PE=1 SV=2 (P08311)	Cathepsin G OS=Homo sapiens GN=CTSG PE=1 SV=2	P08311	Uniprot_human_V1.fasta	28837.5	1	3	3	3	0.000413	0.141
Cluster of Collagen alpha-1(XIV) chain OS=Homo sapiens GN=COL14A1 PE=1 SV=3 (Q05707)	Collagen alpha-1(XIV) chain OS=Homo sapiens GN=COL14A1 PE=1 SV=3	Q05707,Q05707-2	Uniprot_human_V1.fasta	193516	1	12	12	12	0.00165	0.0707
Cluster of Chymase OS=Homo sapiens GN=CMA1 PE=1 SV=1 (P23946)	Chymase OS=Homo sapiens GN=CMA1 PE=1 SV=1	P23946	Uniprot_human_V1.fasta	27325.5	1	4	4	4	0.000551	0.267
Cluster of Fibrinogen alpha chain OS=Homo sapiens GN=FGA PE=1 SV=2 (P02671)	Fibrinogen alpha chain OS=Homo sapiens GN=FGA PE=1 SV=2	P02671,P02671-2	Uniprot_human_V1.fasta	94973.4	1	4	4	5	0.000689	0.0554
Cluster of Fibronectin OS=Homo sapiens GN=FN1 PE=4 SV=1 (E9PE77)	Fibronectin OS=Homo sapiens GN=FN1 PE=4 SV=1	E9PE77,F8W7G7,P02751,P02751-10,P02751-11,P02751-12,P02751-13,P02751-14,P02751-15,P02751-3,P02751-5,P02751-7,P02751-8,P02751-9	Uniprot_human_V1.fasta	256494	1	10	10	10	0.00138	0.0597
Cluster of Tryptase beta-2 OS=Homo sapiens GN=TPSB2 PE=3 SV=1 (F8W8D0)	Tryptase beta-2 OS=Homo sapiens GN=TPSB2 PE=3 SV=1	F8W8D0,H3BMK9,J3QTS8,P20231,Q15661,Q15661-2	Uniprot_human_V1.fasta	30593.6	1	2	2	2	0.000276	0.102
Cluster of Actin, cytoplasmic 1 OS=Homo sapiens GN=ACTB PE=1 SV=1 (P60709)	Actin, gamma-enteric smooth muscle OS=Homo sapiens GN=ACTG2 PE=3 SV=1	E9PG30,P62736,P63267,P68032	Uniprot_human_V1.fasta	37084.5	1	2	2	10	0.00138	0.186
Cluster of Plasminogen OS=Homo sapiens GN=PLG PE=1 SV=2 (P00747)	Plasminogen OS=Homo sapiens GN=PLG PE=1 SV=2	P00747	Uniprot_human_V1.fasta	90567.4	1	6	6	6	0.000827	0.105
Cluster of Histone H3 OS=Homo sapiens GN=HIST2H3PS2 PE=3 SV=1 (Q5TEC6)	Histone H3 OS=Homo sapiens GN=HIST2H3PS2 PE=3 SV=1	Q5TEC6	Uniprot_human_V1.fasta	15430.7	0.997	1	1	2	0.000276	0.125
Cluster of Secreted frizzled-related protein 1 OS=Homo sapiens GN=SFRP1 PE=1 SV=1 (Q8N474)	Secreted frizzled-related protein 1 OS=Homo sapiens GN=SFRP1 PE=1 SV=1	Q8N474	Uniprot_human_V1.fasta	35386.3	1	4	4	4	0.000551	0.131
Cluster of ATP synthase subunit beta OS=Homo sapiens GN=ATP5B PE=3 SV=1 (F8VPV9)	ATP synthase subunit beta OS=Homo sapiens GN=ATP5B PE=3 SV=1	F8VPV9,H0YH81,P06576	Uniprot_human_V1.fasta	55309.1	1	3	3	3	0.000413	0.0869
Cluster of Ankyrin-1 OS=Homo sapiens GN=ANK1 PE=1 SV=3 (P16157)	Ankyrin-1 OS=Homo sapiens GN=ANK1 PE=1 SV=3	P16157,P16157-10,P16157-11,P16157-12,P16157-13,P16157-14,P16157-15,P16157-16,P16157-2,P16157-21,P16157-3,P16157-4,P16157-5,P16157-6,P16157-7,P16157-8,P16157-9	Uniprot_human_V1.fasta	206264	0.872	2	2	2	0.000276	0.00744
Cluster of Pigment epithelium-derived factor OS=Homo sapiens GN=SERPINF1 PE=1 SV=4 (P36955)	Pigment epithelium-derived factor OS=Homo sapiens GN=SERPINF1 PE=1 SV=4	P36955	Uniprot_human_V1.fasta	46314.3	1	4	4	4	0.000551	0.0957
Cluster of Biglycan OS=Homo sapiens GN=BGN PE=2 SV=1 (A6NLG9)	Biglycan OS=Homo sapiens GN=BGN PE=2 SV=1	A6NLG9,P21810	Uniprot_human_V1.fasta	34877.2	1	6	6	6	0.000827	0.218
Cluster of Ferritin light chain OS=Homo sapiens GN=FTL PE=1 SV=2 (P02792)	Ferritin light chain OS=Homo sapiens GN=FTL PE=1 SV=2	P02792	Uniprot_human_V1.fasta	20020.6	0.991	2	2	2	0.000276	0.126
Cluster of Neutrophil defensin 1 OS=Homo sapiens GN=DEFA1 PE=1 SV=1 (P59665)	Neutrophil defensin 1 OS=Homo sapiens GN=DEFA1 PE=1 SV=1	P59665,P59666	Uniprot_human_V1.fasta	10201	1	2	2	2	0.000276	0.191
Cluster of Vimentin OS=Homo sapiens GN=VIM PE=1 SV=4 (P08670)	Vimentin OS=Homo sapiens GN=VIM PE=1 SV=4	P08670	Uniprot_human_V1.fasta	53652.7	1	23	23	28	0.00386	0.536
Cluster of Vitronectin OS=Homo sapiens GN=VTN PE=1 SV=1 (P04004)	Vitronectin OS=Homo sapiens GN=VTN PE=1 SV=1	P04004	Uniprot_human_V1.fasta	54306.1	1	9	11	16	0.00221	0.178
Cluster of C4b-binding protein alpha chain OS=Homo sapiens GN=C4BPA PE=1 SV=2 (P04003)	C4b-binding protein alpha chain OS=Homo sapiens GN=C4BPA PE=1 SV=2	P04003	Uniprot_human_V1.fasta	67033	0.999	2	2	2	0.000276	0.0452
Cluster of Heat shock cognate 71 kDa protein (Fragment) OS=Homo sapiens GN=HSPA8 PE=3 SV=1 (E9PK54)	Heat shock cognate 71 kDa protein (Fragment) OS=Homo sapiens GN=HSPA8 PE=3 SV=1	E9PK54,E9PKE3,E9PLF4,E9PQK7,E9PQQ4,P11142,P11142-2	Uniprot_human_V1.fasta	20012.5	1	2	2	3	0.000413	0.217

## Sheet: training-10
Cluster	Protein name	Protein accession numbers	Database sources	Protein molecular weight (Da)	Protein identification probability	Exclusive unique peptide count	Exclusive unique spectrum count	Total spectrum count	Percentage of total spectra	Percentage sequence coverage
Cluster of Prolargin OS=Homo sapiens GN=PRELP PE=1 SV=1 (P51888)	Prolargin OS=Homo sapiens GN=PRELP PE=1 SV=1	P51888	Uniprot_human_V1.fasta	43812.4	1	7	7	8	0.00204	0.215
Cluster of Lumican OS=Homo sapiens GN=LUM PE=1 SV=2 (P51884)	Lumican OS=Homo sapiens GN=LUM PE=1 SV=2	P51884	Uniprot_human_V1.fasta	38431.5	1	4	4	4	0.00102	0.13
Cluster of Tenascin XB (Fragment) OS=Homo sapiens GN=TNXB PE=4 SV=1 (B0UYQ5)	Tenascin XB (Fragment) OS=Homo sapiens GN=TNXB PE=4 SV=1	B0UYQ5,B0UYX3,B0V046,E7EPQ1,E7EPZ9,E7EU03,E7EWZ8,G5E9A9,P22105,P22105-3,Q9NPK8	Uniprot_human_V1.fasta	245150	1	2	2	2	0.00051	0.0105
Cluster of Keratin, type I cuticular Ha6 OS=Homo sapiens GN=KRT36 PE=1 SV=1 (O76013)	Keratin, type I cuticular Ha6 OS=Homo sapiens GN=KRT36 PE=1 SV=1	O76013,O76013-2	Uniprot_human_V1.fasta	52247	0.272	1	1	3	0.000765	0.0385
Cluster of Junction plakoglobin OS=Homo sapiens GN=JUP PE=1 SV=3 (P14923)	Junction plakoglobin OS=Homo sapiens GN=JUP PE=1 SV=3	P14923	Uniprot_human_V1.fasta	81745.9	1	6	6	6	0.00153	0.0993
Cluster of Galectin-7 OS=Homo sapiens GN=LGALS7 PE=1 SV=2 (P47929)	Galectin-7 OS=Homo sapiens GN=LGALS7 PE=1 SV=2	P47929	Uniprot_human_V1.fasta	15074.7	1	2	2	2	0.00051	0.184
Cluster of Keratin, type I cytoskeletal 9 OS=Homo sapiens GN=KRT9 PE=1 SV=3 (P35527)	Keratin, type I cytoskeletal 9 OS=Homo sapiens GN=KRT9 PE=1 SV=3	P35527	Uniprot_human_V1.fasta	62065.9	1	26	28	32	0.00816	0.621
Cluster of Keratin, type II cytoskeletal 2 epidermal OS=Homo sapiens GN=KRT2 PE=1 SV=2 (P35908)	Keratin, type II cytoskeletal 5 OS=Homo sapiens GN=KRT5 PE=1 SV=3	P13647	Uniprot_human_V1.fasta	62379.6	1	14	14	26	0.00663	0.369
Cluster of Keratin, type I cytoskeletal 10 OS=Homo sapiens GN=KRT10 PE=1 SV=6 (P13645)	Keratin, type I cytoskeletal 10 OS=Homo sapiens GN=KRT10 PE=1 SV=6	P13645	Uniprot_human_V1.fasta	58828.8	1	26	28	42	0.0107	0.462
Cluster of Vitronectin OS=Homo sapiens GN=VTN PE=1 SV=1 (P04004)	Vitronectin OS=Homo sapiens GN=VTN PE=1 SV=1	P04004	Uniprot_human_V1.fasta	54306.1	1	8	8	10	0.00255	0.203
Cluster of Keratin, type I cytoskeletal 16 OS=Homo sapiens GN=KRT16 PE=1 SV=4 (P08779)	Keratin, type I cytoskeletal 17 OS=Homo sapiens GN=KRT17 PE=1 SV=2	Q04695	Uniprot_human_V1.fasta	48106.7	0.999	1	1	15	0.00382	0.208
Cluster of Annexin (Fragment) OS=Homo sapiens GN=ANXA2 PE=3 SV=1 (H0YKL9)	Annexin (Fragment) OS=Homo sapiens GN=ANXA2 PE=3 SV=1	H0YKL9,H0YKS4,H0YKV8,H0YKX9,H0YKZ7,H0YLV6,H0YMD0,H0YMM1,H0YMT9,H0YMU9,H0YMW4,H0YN42,P07355,P07355-2	Uniprot_human_V1.fasta	12064.1	0.998	2	2	2	0.00051	0.173
Cluster of Latent-transforming growth factor beta-binding protein 4 OS=Homo sapiens GN=LTBP4 PE=4 SV=1 (E7EUU1)	Latent-transforming growth factor beta-binding protein 4 OS=Homo sapiens GN=LTBP4 PE=4 SV=1	E7EUU1,Q8N2S1-2	Uniprot_human_V1.fasta	165678	1	3	3	3	0.000765	0.0219
Cluster of Fibrinogen gamma chain OS=Homo sapiens GN=FGG PE=4 SV=1 (C9JC84)	Fibrinogen gamma chain OS=Homo sapiens GN=FGG PE=4 SV=1	C9JC84,C9JEU5,P02679,P02679-2	Uniprot_human_V1.fasta	52339.2	1	3	3	3	0.000765	0.0738
Cluster of Biglycan OS=Homo sapiens GN=BGN PE=2 SV=1 (A6NLG9)	Biglycan OS=Homo sapiens GN=BGN PE=2 SV=1	A6NLG9,P21810	Uniprot_human_V1.fasta	34877.2	1	2	2	2	0.00051	0.0749
Cluster of Apolipoprotein E OS=Homo sapiens GN=APOE PE=1 SV=1 (P02649)	Apolipoprotein E OS=Homo sapiens GN=APOE PE=1 SV=1	P02649	Uniprot_human_V1.fasta	36153.5	1	11	11	11	0.0028	0.347
Cluster of Apolipoprotein A-I OS=Homo sapiens GN=APOA1 PE=1 SV=1 (P02647)	Apolipoprotein A-I OS=Homo sapiens GN=APOA1 PE=1 SV=1	P02647	Uniprot_human_V1.fasta	30778.5	1	5	5	5	0.00127	0.225
Cluster of Actin, cytoplasmic 1 OS=Homo sapiens GN=ACTB PE=1 SV=1 (P60709)	Actin, cytoplasmic 1 OS=Homo sapiens GN=ACTB PE=1 SV=1	P60709,P63261	Uniprot_human_V1.fasta	41737.8	1	5	5	5	0.00127	0.181
Cluster of Haptoglobin beta chain (Fragment) OS=Homo sapiens GN=HP PE=3 SV=1 (J3QLC9)	Haptoglobin beta chain (Fragment) OS=Homo sapiens GN=HP PE=3 SV=1	J3QLC9,J3QR68,P00738,Q0VAC5	Uniprot_human_V1.fasta	40779.7	1	4	4	4	0.00102	0.164
Cluster of Caspase-14 OS=Homo sapiens GN=CASP14 PE=1 SV=2 (P31944)	Caspase-14 OS=Homo sapiens GN=CASP14 PE=1 SV=2	P31944	Uniprot_human_V1.fasta	27679.8	1	2	2	2	0.00051	0.0785
Cluster of Immunoglobulin lambda-like polypeptide 5 OS=Homo sapiens GN=IGLL5 PE=2 SV=2 (B9A064)	Ig lambda-7 chain C region OS=Homo sapiens GN=IGLC7 PE=1 SV=2	A0M8Q6	Uniprot_human_V1.fasta	11302.2	0.999	1	1	5	0.00127	0.349
Cluster of Glyceraldehyde-3-phosphate dehydrogenase OS=Homo sapiens GN=GAPDH PE=3 SV=1 (E7EUT4)	Glyceraldehyde-3-phosphate dehydrogenase OS=Homo sapiens GN=GAPDH PE=3 SV=1	E7EUT4,E7EUT5,P04406	Uniprot_human_V1.fasta	31548	1	2	2	2	0.00051	0.099
Cluster of Keratin, type I cytoskeletal 16 OS=Homo sapiens GN=KRT16 PE=1 SV=4 (P08779)	Keratin, type I cytoskeletal 16 OS=Homo sapiens GN=KRT16 PE=1 SV=4	P08779	Uniprot_human_V1.fasta	51269	1	8	8	26	0.00663	0.471
Cluster of Keratin, type II cytoskeletal 2 epidermal OS=Homo sapiens GN=KRT2 PE=1 SV=2 (P35908)	Keratin, type II cytoskeletal 1b OS=Homo sapiens GN=KRT77 PE=1 SV=3	Q7Z794	Uniprot_human_V1.fasta	61901.9	1	3	3	7	0.00178	0.0917
Cluster of Cathepsin D heavy chain (Fragment) OS=Homo sapiens GN=CTSD PE=3 SV=1 (H7C1V0)	Cathepsin D heavy chain (Fragment) OS=Homo sapiens GN=CTSD PE=3 SV=1	H7C1V0,H7C469,P07339	Uniprot_human_V1.fasta	20371.6	0.979	2	2	2	0.00051	0.101
Cluster of Collagen alpha-3(VI) chain OS=Homo sapiens GN=COL6A3 PE=4 SV=1 (E7ENL6)	Collagen alpha-3(VI) chain OS=Homo sapiens GN=COL6A3 PE=4 SV=1	E7ENL6,E9PCV6,E9PFQ6,P12111,P12111-2	Uniprot_human_V1.fasta	322186	1	18	18	18	0.00459	0.0746
Cluster of Collagen alpha-1(VI) chain OS=Homo sapiens GN=COL6A1 PE=1 SV=3 (P12109)	Collagen alpha-1(VI) chain OS=Homo sapiens GN=COL6A1 PE=1 SV=3	P12109	Uniprot_human_V1.fasta	108531	1	6	6	8	0.00204	0.0798
Cluster of Keratin, type II cytoskeletal 2 epidermal OS=Homo sapiens GN=KRT2 PE=1 SV=2 (P35908)	Keratin, type II cytoskeletal 2 epidermal OS=Homo sapiens GN=KRT2 PE=1 SV=2	P35908	Uniprot_human_V1.fasta	65433.9	1	24	28	45	0.0115	0.579
Cluster of Ig gamma-1 chain C region OS=Homo sapiens GN=IGHG1 PE=1 SV=1 (P01857)	Ig gamma-1 chain C region OS=Homo sapiens GN=IGHG1 PE=1 SV=1	P01857	Uniprot_human_V1.fasta	36105	1	13	13	16	0.00408	0.515
Cluster of Hemoglobin subunit beta OS=Homo sapiens GN=HBB PE=1 SV=2 (P68871)	Hemoglobin subunit beta OS=Homo sapiens GN=HBB PE=1 SV=2	P68871	Uniprot_human_V1.fasta	15998	1	6	8	19	0.00484	0.782
Cluster of Keratin, type II cytoskeletal 78 OS=Homo sapiens GN=KRT78 PE=2 SV=2 (Q8N1N4)	Keratin, type II cytoskeletal 78 OS=Homo sapiens GN=KRT78 PE=2 SV=2	Q8N1N4	Uniprot_human_V1.fasta	56866.4	0.998	2	2	2	0.00051	0.0442
Cluster of Desmocollin-1 OS=Homo sapiens GN=DSC1 PE=1 SV=2 (Q08554)	Desmocollin-1 OS=Homo sapiens GN=DSC1 PE=1 SV=2	Q08554,Q08554-2	Uniprot_human_V1.fasta	99988.1	1	2	3	3	0.000765	0.0302
Cluster of Hemoglobin subunit alpha OS=Homo sapiens GN=HBA1 PE=1 SV=2 (P69905)	Hemoglobin subunit alpha OS=Homo sapiens GN=HBA1 PE=1 SV=2	P69905	Uniprot_human_V1.fasta	15257.6	1	7	7	9	0.00229	0.627
Cluster of Clusterin OS=Homo sapiens GN=CLU PE=1 SV=1 (P10909)	Clusterin OS=Homo sapiens GN=CLU PE=1 SV=1	P10909,P10909-2,P10909-4,P10909-5	Uniprot_human_V1.fasta	52495	1	8	8	10	0.00255	0.236
Cluster of Fibrinogen alpha chain OS=Homo sapiens GN=FGA PE=1 SV=2 (P02671)	Fibrinogen alpha chain OS=Homo sapiens GN=FGA PE=1 SV=2	P02671,P02671-2	Uniprot_human_V1.fasta	94973.4	1	3	3	3	0.000765	0.0393
Cluster of Desmoglein-1 OS=Homo sapiens GN=DSG1 PE=1 SV=2 (Q02413)	Desmoglein-1 OS=Homo sapiens GN=DSG1 PE=1 SV=2	Q02413	Uniprot_human_V1.fasta	113749	1	3	3	3	0.000765	0.0439
Cluster of Keratin, type II cytoskeletal 2 epidermal OS=Homo sapiens GN=KRT2 PE=1 SV=2 (P35908)	Keratin, type II cytoskeletal 3 OS=Homo sapiens GN=KRT3 PE=3 SV=1	J3QST3,P12035	Uniprot_human_V1.fasta	64506	0.781	1	1	9	0.00229	0.11
Cluster of Peroxiredoxin-1 OS=Homo sapiens GN=PRDX1 PE=1 SV=1 (Q06830)	Peroxiredoxin-1 OS=Homo sapiens GN=PRDX1 PE=1 SV=1	Q06830	Uniprot_human_V1.fasta	22110.9	0.688	1	1	2	0.00051	0.106
Cluster of Dickkopf-related protein 3 OS=Homo sapiens GN=DKK3 PE=4 SV=2 (E7EUD0)	Dickkopf-related protein 3 OS=Homo sapiens GN=DKK3 PE=4 SV=2	E7EUD0,F6SYF8,Q9UBP4	Uniprot_human_V1.fasta	35314.3	1	3	3	3	0.000765	0.14
Cluster of Hemoglobin subunit beta OS=Homo sapiens GN=HBB PE=1 SV=2 (P68871)	Hemoglobin subunit delta OS=Homo sapiens GN=HBD PE=1 SV=2	P02042	Uniprot_human_V1.fasta	16055.2	1	3	3	11	0.0028	0.565
Cluster of Serum albumin OS=Homo sapiens GN=ALB PE=1 SV=2 (P02768)	Serum albumin OS=Homo sapiens GN=ALB PE=1 SV=2	P02768	Uniprot_human_V1.fasta	69366.9	1	25	25	25	0.00637	0.392
Cluster of Transthyretin OS=Homo sapiens GN=TTR PE=1 SV=1 (P02766)	Transthyretin OS=Homo sapiens GN=TTR PE=1 SV=1	P02766	Uniprot_human_V1.fasta	15886.9	1	2	2	2	0.00051	0.245
Cluster of Keratin, type II cytoskeletal 1 OS=Homo sapiens GN=KRT1 PE=1 SV=6 (P04264)	Keratin, type II cytoskeletal 1 OS=Homo sapiens GN=KRT1 PE=1 SV=6	P04264	Uniprot_human_V1.fasta	66040.3	1	35	35	51	0.013	0.559
Cluster of Ig heavy chain V-III region VH26 OS=Homo sapiens PE=1 SV=1 (P01764)	Ig heavy chain V-III region VH26 OS=Homo sapiens PE=1 SV=1	P01764	Uniprot_human_V1.fasta	12582.6	1	2	2	2	0.00051	0.128
Cluster of Fibrillin-1 OS=Homo sapiens GN=FBN1 PE=1 SV=3 (P35555)	Fibrillin-1 OS=Homo sapiens GN=FBN1 PE=1 SV=3	P35555	Uniprot_human_V1.fasta	312226	1	20	20	20	0.0051	0.0756
Cluster of Immunoglobulin lambda-like polypeptide 5 OS=Homo sapiens GN=IGLL5 PE=2 SV=2 (B9A064)	Immunoglobulin lambda-like polypeptide 5 OS=Homo sapiens GN=IGLL5 PE=2 SV=2	B9A064,P0CG04	Uniprot_human_V1.fasta	23062.9	1	2	3	10	0.00255	0.252
Cluster of Keratin, type II cytoskeletal 2 epidermal OS=Homo sapiens GN=KRT2 PE=1 SV=2 (P35908)	Keratin, type II cytoskeletal 6A OS=Homo sapiens GN=KRT6A PE=1 SV=3	P02538	Uniprot_human_V1.fasta	60046.4	1	3	3	24	0.00612	0.367
Cluster of Keratin, type I cytoskeletal 16 OS=Homo sapiens GN=KRT16 PE=1 SV=4 (P08779)	Keratin, type I cytoskeletal 14 OS=Homo sapiens GN=KRT14 PE=1 SV=4	P02533	Uniprot_human_V1.fasta	51562.5	1	8	8	30	0.00765	0.564
Cluster of Keratin, type II cytoskeletal 2 epidermal OS=Homo sapiens GN=KRT2 PE=1 SV=2 (P35908)	Keratin, type II cytoskeletal 6B OS=Homo sapiens GN=KRT6B PE=1 SV=5	P04259	Uniprot_human_V1.fasta	60068.6	1	2	2	24	0.00612	0.351
Cluster of Desmoplakin OS=Homo sapiens GN=DSP PE=1 SV=3 (P15924)	Desmoplakin OS=Homo sapiens GN=DSP PE=1 SV=3	P15924	Uniprot_human_V1.fasta	331781	1	11	11	11	0.0028	0.0376
Cluster of Vimentin OS=Homo sapiens GN=VIM PE=3 SV=1 (B0YJC4)	Vimentin OS=Homo sapiens GN=VIM PE=3 SV=1	B0YJC4,P08670	Uniprot_human_V1.fasta	49654.4	1	12	12	12	0.00306	0.325
Cluster of Apolipoprotein A-IV OS=Homo sapiens GN=APOA4 PE=1 SV=3 (P06727)	Apolipoprotein A-IV OS=Homo sapiens GN=APOA4 PE=1 SV=3	P06727	Uniprot_human_V1.fasta	45399.4	1	32	34	38	0.00969	0.601
Cluster of Collagen alpha-2(VI) chain OS=Homo sapiens GN=COL6A2 PE=1 SV=4 (P12110)	Collagen alpha-2(VI) chain OS=Homo sapiens GN=COL6A2 PE=1 SV=4	P12110,P12110-2,P12110-3	Uniprot_human_V1.fasta	108581	0.998	2	2	2	0.00051	0.0177
Cluster of Peroxiredoxin-1 OS=Homo sapiens GN=PRDX1 PE=1 SV=1 (Q06830)	Peroxiredoxin-2 OS=Homo sapiens GN=PRDX2 PE=1 SV=5	P32119	Uniprot_human_V1.fasta	21892.4	0.48	1	1	2	0.00051	0.101
Cluster of Serum amyloid P-component OS=Homo sapiens GN=APCS PE=1 SV=2 (P02743)	Serum amyloid P-component OS=Homo sapiens GN=APCS PE=1 SV=2	P02743	Uniprot_human_V1.fasta	25387.7	1	7	7	8	0.00204	0.247

[truncated: 56 more sheets: training-11, training-12, training-13, training14, training15, training16, training17, training18, training19, training20, control-1, control-2, control-3, control-4, control-5, control-6, control-7, control-8, control-9, control-10 …]
